# Supplementary material for: Reconstruction of Oryza sativa indica Genome Scale Metabolic Model and Its Responses to Varying RuBisCO Activity, Light Intensity, and Enzymatic Cost Conditions
Source: Front Plant Sci. 2017 Nov 30;8:2060. doi: 10.3389/fpls.2017.02060 (PMC5715477; doi:10.3389/fpls.2017.02060)
Supplement: Supplementary file 4 [file Data_Sheet_2.XLS]

## Sheet: Sheet1
1st column: GI number of the protein sequences of indica
2nd column: EC number
3rd column: Uniprot ID corresponding the GI number
4th column: Gene names obtained from Uniprot database
GI number	EC Number	Uniprot ID	Gene names
125531204	1.1.1.1	A2Z585_ORYSI	OsI_32807
218200042	1.1.1.1	B8B8N3_ORYSI	OsI_26910
218200041	1.1.1.1	B8B8N2_ORYSI	OsI_26909
218192232	1.1.1.1	B8APR3_ORYSI	OsI_10323
218192231	1.1.1.1	B8APR2_ORYSI	OsI_10321
125540432	1.1.1.1	A2X7L7_ORYSI	OsI_08208
125533786	1.1.1.1	A2ZCK0_ORYSI	OsI_35503
125533787,221327773	1.1.1.1	A2ZCK1_ORYSI	OSI9Ba083O10_092B13-3 OsI_35504
296248164	1.1.1.1	D7PPL2_ORYSI	adh1
296248142	1.1.1.1	D7PPK1_ORYSI	adh1
296248136	1.1.1.1	D7PPJ8_ORYSI	adh1
296248134	1.1.1.1	D7PPJ7_ORYSI	adh1
296248120	1.1.1.1	D7PPJ0_ORYSI	adh1
296248118	1.1.1.1	D7PPI9_ORYSI	adh1
296248106	1.1.1.1	D7PPI3_ORYSI	adh1
296248100	1.1.1.1	D7PPI0_ORYSI	adh1
296248098	1.1.1.1	D7PPH9_ORYSI	adh1
296248096	1.1.1.1	D7PPH8_ORYSI	adh1
221327774,67845941	1.1.1.1	B9V0M0_ORYSI	OSI9Ba083O10_092B13-4
67845939	1.1.1.1	Q4R1E9_ORYSI	Adh2
125533783,210142236,210142234,221327775,34787335	1.1.1.1	B6F2B9_ORYSI	ADH1 OSI9Ba083O10_092B13-5
20169,75339814	1.1.1.1	ADH2_ORYSI	ADH2
20165,75326550	1.1.1.1	ADH1_ORYSI	ADH1 OsI_034290
218195744	6.3.1.2	B8AVN6_ORYSI	OsI_17756
218193634	6.3.1.2	B8AQE3_ORYSI	OsI_13264
218192361	6.3.1.2	B8AJN3_ORYSI	OsI_10575
218191527	6.3.1.2	B8AI28_ORYSI	OsI_08842
116310855	6.3.1.2	Q01HZ7_ORYSA	OSIGBa0132E09-OSIGBa0108L24.11
125532268	2.7.1.26	A2Z899_ORYSI	OsI_33938
125531419	2.7.1.26	A2Z5V0_ORYSI	OsI_33028
218185029	3.2.1.2	B8BIA3_ORYSI	OsI_34681
125532277	3.2.1.2	A2Z8A8_ORYSI	OsI_33946
218202663	3.2.1.2	B8BEN8_ORYSI	OsI_32458
218199795	3.2.1.2	B8B797_ORYSI	OsI_26370
125558692	3.2.1.2	A2YMB7_ORYSI	OsI_26372
125542346	3.2.1.2	A2XCC5_ORYSI	OsI_09956
125537939	3.2.1.2	A2X0H4_ORYSI	OsI_05709
218184937	6.3.2.19	B8BI11_ORYSI	OsI_34467
218184640	6.3.2.19	B8BH65_ORYSI	OsI_33825
149391588	6.3.2.19	A6N0N4_ORYSI
149391459	6.3.2.19	A6N0H7_ORYSI
218201921	6.3.2.19	B8BEJ0_ORYSI	OsI_30867
218201861	6.3.2.19	B8BE02_ORYSI	OsI_30763
218201858	6.3.2.19	B8BDZ9_ORYSI	OsI_30757
218201071	6.3.2.19	B8BAA3_ORYSI	OsI_29037
218199151	6.3.2.19	B8B7L6_ORYSI	OsI_25030
218197251	6.3.2.19	B8AWH8_ORYSI	OsI_20940
218196378	6.3.2.19	B8AZQ0_ORYSI	OsI_19067
218196214	6.3.2.19	B8AYY8_ORYSI	OsI_18725
218192667	6.3.2.19	B8AMH5_ORYSI	OsI_11252
218192664	6.3.2.19	B8AMH2_ORYSI	OsI_11245
218189284	6.3.2.19	B8ABB5_ORYSI	OsI_04224
218188838	6.3.2.19	B8A7K2_ORYSI	OsI_03255
218188827	6.3.2.19	B8A797_ORYSI	OsI_03230
218188784	6.3.2.19	B8A6V8_ORYSI	OsI_03131
218187823	6.3.2.19	B8AB20_ORYSI	OsI_01043
218187313	6.3.2.19	B8BN69_ORYSI	OsI_39266
125556356	6.3.2.19	A2YFV1_ORYSI	OsI_23994
125555498	6.3.2.19	A2YDE3_ORYSI	OsI_23134
125554386	6.3.2.19	A2YA81_ORYSI	OsI_21994
125553272	6.3.2.19	A2Y7C1_ORYSI	OsI_20939
125552611	6.3.2.19	A2Y5G0_ORYSI	OsI_20228
125550147	6.3.2.19	A2XYQ9_ORYSI	OsI_17840
125549448	6.3.2.19	A2XWR0_ORYSI	OsI_17093
125546000	6.3.2.19	A2XMS9_ORYSI	OsI_13850
125542190	6.3.2.19	A2XBW9_ORYSI	OsI_09788
125538883	6.3.2.19	A2X368_ORYSI	OsI_06649
125537855	6.3.2.19	A2X090_ORYSI	OsI_05630
125528935	6.3.2.19	A2WYK3_ORYSI	OsI_05005
125528325	6.3.2.19	A2WWU3_ORYSI	OsI_04373
125526761	6.3.2.19	A2WSC9_ORYSI	OsI_02764
125525360	6.3.2.19	A2WNC8_ORYSI	OsI_01354
125525042	6.3.2.19	A2WMG0_ORYSI	OsI_01029
116308863,90399233	6.3.2.19	Q259X8_ORYSA	B0811B10.8 H1005F08.29
83306206	6.3.2.19	Q2WEA9_ORYSI	ubc4
218184709	2.4.1.12	B8BHD7_ORYSI	OsI_33963
218199503	2.4.1.12	B8B5I2_ORYSI	OsI_25789
218199385	2.4.1.12	B8B4T1_ORYSI	OsI_25542
125557649	2.4.1.12	A2YJC4_ORYSI	OsI_25338
294979134	2.4.1.12	D4QEZ7_ORYSI	CesA9
125551023,171769903	2.4.1.12	CESA1_ORYSI	CESA1 OsI_017965
218189052,172044097	2.4.1.12	CESA4_ORYSI	CESA4 OsI_03742
125563759,171769930	2.4.1.12	CESA9_ORYSI	CESA9 OsI_030371
125546137,171769910	2.4.1.12	CESA2_ORYSI	CESA2 OsI_013509
125546353,171769909	2.4.1.12	CESA5_ORYSI	CESA5 OsI_013725
125532328,317376140	4.2.1.104	CYNS_ORYSI	CYN OsI_33997
218192020	3.6.1.15	B8AME0_ORYSI	OsI_09852
218184744	1.1.1.37	B8BHG9_ORYSI	OsI_34036
218195333	1.1.1.37	B8ASX9_ORYSI	OsI_16901
218187302	1.1.1.37	B8BN58_ORYSI	OsI_39238
125561648	1.1.1.37	A2YVI5_ORYSI	OsI_29345
125553415	1.1.1.37	A2Y7R4_ORYSI	OsI_21084
125545870	1.1.1.37	A2XME9_ORYSI	OsI_13699
125538784	1.1.1.37	A2X2W9_ORYSI	OsI_06537
125528248	1.1.1.37	A2WWL6_ORYSI	OsI_04294
125527066	1.1.1.37	A2WT84_ORYSI	OsI_03070
116310134	1.1.1.37	Q01JC3_ORYSA	OSIGBa0122F23.7
125553718,125553717	1.1.1.27	A2Y8B2_ORYSI	OsI_21291 OsI_21292
125537711	1.1.1.27	A2WZU6_ORYSI	OsI_05489
218201257	1.5.99.12	B8BBB8_ORYSI	OsI_29488
218198416	1.5.99.12	B8B3V2_ORYSI	OsI_23446
218190328	1.5.99.12	B8AE82_ORYSI	OsI_06398
218187685	1.5.99.12	B8ADR5_ORYSI	OsI_00771
125552098	1.5.99.12	A2Y3Z7_ORYSI	OsI_19727
125538647	1.5.99.12	A2X2I2_ORYSI	OsI_06399
125535808	1.5.99.12	A2ZI62_ORYSI	OsI_37507
125529054	1.5.99.12	A2WYX2_ORYSI	OsI_05138
125527897	1.5.99.12	A2WVL5_ORYSI	OsI_03936
125524722	1.5.99.12	A2WLJ0_ORYSI	OsI_00707
125549071,116310941,296439544	1.5.99.12	CKX8_ORYSI	CKX8 OsI_16693 OSIGBa0153E02-OSIGBa0093I20.7
125549433	4.4.1.14	A2XWP5_ORYSI	OsI_17075
125524754	4.4.1.14	A2WLM2_ORYSI	OsI_00740
116309684	4.4.1.14	Q01KI9_ORYSA	H0404F02.8
3288564	4.4.1.14	O24220_ORYSA	acs5
125545583,294704,294702,148886763	4.4.1.14	1A11_ORYSI	ACC1 OsI_012955
218196223	2.7.1.1	B8AYW1_ORYSI	OsI_18744
218187664	2.7.1.1	B8ADP4_ORYSI	OsI_00720
125558170	2.7.1.1	A2YKU5_ORYSI	OsI_25838
125557582	2.7.1.1	A2YJ57_ORYSI	OsI_25263
125553095	2.7.1.1	A2Y6U4_ORYSI	OsI_20748
125553030	2.7.1.1	A2Y6M9_ORYSI	OsI_20669
125552102	2.7.1.1	A2Y401_ORYSI	OsI_19731
125529055	2.7.1.1	A2WYX3_ORYSI	OsI_05139
125527661	2.7.1.1	A2WUX9_ORYSI	OsI_03691
125527545	2.7.1.1	A2WUL3_ORYSI	OsI_03566
218184804	3.2.1.22	B8BHM9_ORYSI	OsI_34152
218184802	3.2.1.22	B8BHM7_ORYSI	OsI_34149
218200260	3.2.1.22	B8B656_ORYSI	OsI_27343
125558188	3.2.1.22	A2YKW3_ORYSI	OsI_25855
218184807	1.2.1.38	B8BHN2_ORYSI	OsI_34159
218193315	1.2.1.38	B8AMJ8_ORYSI	OsI_12624
125550239	1.3.1.33	A2XZ01_ORYSI	OsI_17934
90399045,90398977	1.3.1.33	Q259D2_ORYSA	H0801D08.7 H0402C08.17
149392739	1.2.1.70	A6N1Q2_ORYSI
125532547,2920320,158513651	1.2.1.70	HEM1_ORYSI	OsI_033071
218187513	5.3.1.1	B8AD93_ORYSI	OsI_00389
125564498	5.3.1.1	A2Z3G7_ORYSI	OsI_32171
125528336	5.3.1.1	A2WWV4_ORYSI	OsI_04384
125531870	3.1.1.11	A2Z751_ORYSI	OsI_33526
149391993	3.1.1.11	A6N0X1_ORYSI
218202672	3.1.1.11	B8BEU1_ORYSI	OsI_32473
218202557	3.1.1.11	B8BE33_ORYSI	OsI_32252
218200666	3.1.1.11	B8BBW3_ORYSI	OsI_28228
218200243	3.1.1.11	B8B5V1_ORYSI	OsI_27314
218200170	3.1.1.11	B8B5E1_ORYSI	OsI_27157
218199993	3.1.1.11	B8B8C0_ORYSI	OsI_26811
218197119	3.1.1.11	B8B011_ORYSI	OsI_20666
218195205	3.1.1.11	B8ARR6_ORYSI	OsI_16624
218191700	3.1.1.11	B8AJK1_ORYSI	OsI_09190
218188722	3.1.1.11	B8ACB4_ORYSI	OsI_02978
218188078	3.1.1.11	B8A748_ORYSI	OsI_01594
218187082	3.1.1.11	B8BMI9_ORYSI	OsI_38743
125563831	3.1.1.11	A2Z1K0_ORYSI	OsI_31486
125561737	3.1.1.11	A2YVS4_ORYSI	OsI_29431
125561736	3.1.1.11	A2YVS3_ORYSI	OsI_29430
125560576	3.1.1.11	A2YSG3_ORYSI	OsI_28269
125559693	3.1.1.11	A2YQ68_ORYSI	OsI_27427
125559437	3.1.1.11	A2YPG2_ORYSI	OsI_27154
125552007	3.1.1.11	A2Y3Q6_ORYSI	OsI_19639
125549932	3.1.1.11	A2XY44_ORYSI	OsI_17629
125549281	3.1.1.11	A2XW93_ORYSI	OsI_16919
125548569	3.1.1.11	A2XU81_ORYSI	OsI_16158
125548566	3.1.1.11	A2XU78_ORYSI	OsI_16156
125548399	3.1.1.11	A2XTR1_ORYSI	OsI_15995
125544212	3.1.1.11	A2XHP1_ORYSI	OsI_11933
39653369,125543585	3.1.1.11	Q7XAB4_ORYSI	OsI_11262
125543518	3.1.1.11	A2XFP7_ORYSI	OsI_11188
125539015	3.1.1.11	A2X3K0_ORYSI	OsI_06789
125535244	3.1.1.11	A2ZGQ8_ORYSI	OsI_36964
125535195	3.1.1.11	A2ZGK9_ORYSI	OsI_36916
125535192	3.1.1.11	A2ZGK6_ORYSI	OsI_36913
125534817	3.1.1.11	A2ZFI1_ORYSI	OsI_36536
125533708	3.1.1.11	A2ZCC2_ORYSI	OsI_35428
125533563	3.1.1.11	A2ZBX7_ORYSI	OsI_35283
125528593	3.1.1.11	A2WXL1_ORYSI	OsI_04662
125527989	3.1.1.11	A2WVV7_ORYSI	OsI_04029
125527665	3.1.1.11	A2WUY3_ORYSI	OsI_03695
125525601	3.1.1.11	A2WP19_ORYSI	OsI_01593
125525537	3.1.1.11	A2WNV5_ORYSI	OsI_01540
116310790	3.1.1.11	Q01I60_ORYSA	H0315A08.12
116310406	3.1.1.11	Q01IM5_ORYSA	OSIGBa0143N19.9
116310053	3.1.1.11	Q01JK0_ORYSA	OSIGBa0097P08.5
90399222	3.1.1.11	Q259Y4_ORYSA	B0414F07.5
90399101	3.1.1.11	Q9FSR2_ORYSA	H0423H10.1
218184883	1.5.5.1	B8BHV8_ORYSI	OsI_34318
218193091	2.7.1.107	B8AK66_ORYSI	OsI_12126
218187130	2.7.1.107	B8BMN7_ORYSI	OsI_38855
218186607	2.7.1.107	B8BNP3_ORYSI	OsI_37845
218184915	2.5.1.18	B8BHY9_ORYSI	OsI_34397
218184912	2.5.1.18	B8BHY6_ORYSI	OsI_34392
125532745	2.5.1.18	A2Z9M6_ORYSI	OsI_34436
125532742	2.5.1.18	A2Z9M3_ORYSI	OsI_34433
125532741	2.5.1.18	A2Z9M2_ORYSI	OsI_34432
125532740	2.5.1.18	A2Z9M1_ORYSI	OsI_34431
125532738	2.5.1.18	A2Z9L9_ORYSI	OsI_34429
125532737	2.5.1.18	A2Z9L8_ORYSI	OsI_34428
125532736	2.5.1.18	A2Z9L7_ORYSI	OsI_34427
125532735	2.5.1.18	A2Z9L6_ORYSI	OsI_34426
125532734	2.5.1.18	A2Z9L5_ORYSI	OsI_34425
125532732	2.5.1.18	A2Z9L3_ORYSI	OsI_34423
125532731	2.5.1.18	A2Z9L2_ORYSI	OsI_34422
125532727	2.5.1.18	A2Z9K8_ORYSI	OsI_34418
125532726	2.5.1.18	A2Z9K7_ORYSI	OsI_34417
125532723	2.5.1.18	A2Z9K4_ORYSI	OsI_34414
125532722	2.5.1.18	A2Z9K3_ORYSI	OsI_34413
125532720	2.5.1.18	A2Z9K1_ORYSI	OsI_34411
125532718	2.5.1.18	A2Z9J9_ORYSI	OsI_34399
125532717	2.5.1.18	A2Z9J8_ORYSI	OsI_34398
125532711	2.5.1.18	A2Z9J2_ORYSI	OsI_34391
125532558	2.5.1.18	A2Z939_ORYSI	OsI_34229
125531797	2.5.1.18	A2Z6X8_ORYSI	OsI_33448
125532729,33304610	2.5.1.18	Q6WSC3_ORYSI	OsI_34420
149392151	2.5.1.18	A6N115_ORYSI
149391391	2.5.1.18	A6N0E3_ORYSI
146230674	2.5.1.18	A5H9K2_ORYSI	GST
218193252	2.5.1.18	B8ALP6_ORYSI	OsI_12484
218190996	2.5.1.18	B8ADZ2_ORYSI	OsI_07693
218190329	2.5.1.18	B8AE83_ORYSI	OsI_06401
218189735	2.5.1.18	B8A963_ORYSI	OsI_05205
218189734	2.5.1.18	B8A962_ORYSI	OsI_05201
218188241	2.5.1.18	B8A893_ORYSI	OsI_01972
218188176	2.5.1.18	B8A7V2_ORYSI	OsI_01840
218186587	2.5.1.18	B8BNM3_ORYSI	OsI_37808
125564566	2.5.1.18	A2Z3N5_ORYSI	OsI_32245
125564044	2.5.1.18	A2Z263_ORYSI	OsI_31697
125563447	2.5.1.18	A2Z0G6_ORYSI	OsI_31090
125562470	2.5.1.18	A2YXV7_ORYSI	OsI_30172
125560803	2.5.1.18	A2YT40_ORYSI	OsI_28488
125558267	2.5.1.18	A2YL42_ORYSI	OsI_25933
125557369	2.5.1.18	A2YIJ4_ORYSI	OsI_25040
125552334	2.5.1.18	A2Y4N3_ORYSI	OsI_19958
125550848	2.5.1.18	A2Y0E7_ORYSI	OsI_18462
125545040	2.5.1.18	A2XK19_ORYSI	OsI_12788
125542290	2.5.1.18	A2XC69_ORYSI	OsI_09893
125542289	2.5.1.18	A2XC68_ORYSI	OsI_09892
125542288	2.5.1.18	A2XC67_ORYSI	OsI_09891
125542283	2.5.1.18	A2XC62_ORYSI	OsI_09885
125536099	2.5.1.18	A2ZJ03_ORYSI	OsI_37809
125535012	2.5.1.18	A2ZG26_ORYSI	OsI_36725
125533947	2.5.1.18	A2ZD11_ORYSI	OsI_35674
125529117	2.5.1.18	A2WZ35_ORYSI	OsI_05203
125529114	2.5.1.18	A2WZ32_ORYSI	OsI_05200
125529113	2.5.1.18	A2WZ31_ORYSI	OsI_05199
125529001	2.5.1.18	A2WYR9_ORYSI	OsI_05077
125527815	2.5.1.18	A2WVD3_ORYSI	OsI_03848
125527334	2.5.1.18	A2WU02_ORYSI	OsI_03349
125527333	2.5.1.18	A2WU01_ORYSI	OsI_03348
125526411	2.5.1.18	A2WRC9_ORYSI	OsI_02415
125525983	2.5.1.18	A2WQ51_ORYSI	OsI_01983
125525968	2.5.1.18	A2WQ36_ORYSI	OsI_01970
125525960	2.5.1.18	A2WQ28_ORYSI	OsI_01962
125525959	2.5.1.18	A2WQ27_ORYSI	OsI_01961
125525953	2.5.1.18	A2WQ21_ORYSI	OsI_01955
125532730,33304612,317452862	2.5.1.18	Q6WSC2_ORYSI	gstu4 OsI_34421
294991861	2.5.1.18	D6PVA8_ORYSI
125545953,2944088,158512925	2.5.1.18	GSTU1_ORYSI	GSTU1 GST1 OsI_013325
125532701	3.1.4.4	A2Z9I2_ORYSI	OsI_34382
218202551	3.1.4.4	B8BE27_ORYSI	OsI_32238
218199398	3.1.4.4	B8B515_ORYSI	OsI_25571
218198504	3.1.4.4	B8B4D2_ORYSI	OsI_23625
218196631	3.1.4.4	B8AX48_ORYSI	OsI_19623
218194071	3.1.4.4	B8AN68_ORYSI	OsI_14257
218191975	3.1.4.4	B8ALW4_ORYSI	OsI_09757
218188074	3.1.4.4	B8A6S5_ORYSI	OsI_01583
218187597	3.1.4.4	B8ADH7_ORYSI	OsI_00588
125563751	3.1.4.4	A2Z1C0_ORYSI	OsI_31401
125551001	3.1.4.4	A2Y0V0_ORYSI	OsI_18631
125544168	3.1.4.4	A2XHJ7_ORYSI	OsI_11882
8699602	3.1.4.4	Q9LKM1_ORYSI	RPLD5
125555984,8699600	3.1.4.4	Q9LKM2_ORYSI	RPLD4 OsI_23624
125555983,8699598	3.1.4.4	Q9LKM3_ORYSI	RPLD3 OsI_23623
218184896	3.2.1.28	B8BHX0_ORYSI	OsI_34354
218189669	2.7.6.2	B8A8S1_ORYSI	OsI_05056
218188192	1.7.7.1	B8A7W8_ORYSI	OsI_01871
218199184	2.7.7.3	B8B7Y9_ORYSI	OsI_25114
218190003	2.7.7.3	B8AHG4_ORYSI	OsI_05748
125532997	1.11.1.7	A2ZAC8_ORYSI	OsI_34695
125532781	1.11.1.7	A2Z9R2_ORYSI	OsI_34475
125532780	1.11.1.7	A2Z9R1_ORYSI	OsI_34474
125530922	1.11.1.7	A2Z4F3_ORYSI	OsI_32530
125530920	1.11.1.7	A2Z4F1_ORYSI	OsI_32528
125530912	1.11.1.7	A2Z4E3_ORYSI	OsI_32519
154795603	1.11.1.7	A7LBL0_ORYSI	LOC_Os06g48030
149391381	1.11.1.7	A6N0D8_ORYSI
218202306	1.11.1.7	B8BCP0_ORYSI	OsI_31721
218201932	1.11.1.7	B8BEG2_ORYSI	OsI_30885
218201513	1.11.1.7	B8B937_ORYSI	OsI_30025
218200377	1.11.1.7	B8BA60_ORYSI	OsI_27578
218200257	1.11.1.7	B8B653_ORYSI	OsI_27330
218200254	1.11.1.7	B8B5W7_ORYSI	OsI_27325
218200253	1.11.1.7	B8B5W6_ORYSI	OsI_27324
218200100	1.11.1.7	B8B530_ORYSI	OsI_27042
218200097	1.11.1.7	B8B527_ORYSI	OsI_27034
218199669	1.11.1.7	B8B6E4_ORYSI	OsI_26103
218198991	1.11.1.7	B8B6S0_ORYSI	OsI_24670
218198950	1.11.1.7	B8B6J1_ORYSI	OsI_24583
218198815	1.11.1.7	B8B272_ORYSI	OsI_24308
218198814	1.11.1.7	B8B271_ORYSI	OsI_24304
218198763	1.11.1.7	B8B1H3_ORYSI	OsI_24196
218198353	1.11.1.7	B8B3L5_ORYSI	OsI_23305
218197958	1.11.1.7	B8B0K1_ORYSI	OsI_22509
218196046	1.11.1.7	B8AXN5_ORYSI	OsI_18358
218196043	1.11.1.7	B8AXU8_ORYSI	OsI_18352
218195872	1.11.1.7	B8ARU5_ORYSI	OsI_18021
218195871	1.11.1.7	B8ARU4_ORYSI	OsI_18019
218195870	1.11.1.7	B8ARU3_ORYSI	OsI_18017
218195717	1.11.1.7	B8AVM7_ORYSI	OsI_17703
218192906	1.11.1.7	B8AQ75_ORYSI	OsI_11725
218192794	1.11.1.7	B8APG4_ORYSI	OsI_11488
218192793	1.11.1.7	B8APG3_ORYSI	OsI_11487
218191986	1.11.1.7	B8ALX5_ORYSI	OsI_09777
218191985	1.11.1.7	B8ALX4_ORYSI	OsI_09774
218189789	1.11.1.7	B8A9K9_ORYSI	OsI_05316
218189428	1.11.1.7	B8A6X3_ORYSI	OsI_04549
218188949	1.11.1.7	B8A8N2_ORYSI	OsI_03489
218188809	1.11.1.7	B8A775_ORYSI	OsI_03192
218188409	1.11.1.7	B8A9Q6_ORYSI	OsI_02331
218188253	1.11.1.7	B8A8A8_ORYSI	OsI_02005
218188114	1.11.1.7	B8A755_ORYSI	OsI_01679
218188112	1.11.1.7	B8A753_ORYSI	OsI_01672
218187712	1.11.1.7	B8A6K4_ORYSI	OsI_00829
218186985	1.11.1.7	B8BM92_ORYSI	OsI_38572
218186156	1.11.1.7	B8BLQ0_ORYSI	OsI_36924
125564307	1.11.1.7	A2Z2X6_ORYSI	OsI_31969
125563233	1.11.1.7	A2YZV2_ORYSI	OsI_30884
125562230	1.11.1.7	A2YX67_ORYSI	OsI_29935
125559711	1.11.1.7	A2YQ86_ORYSI	OsI_27449
125559602	1.11.1.7	A2YPX7_ORYSI	OsI_27331
125559600	1.11.1.7	A2YPX5_ORYSI	OsI_27329
125559597	1.11.1.7	A2YPX2_ORYSI	OsI_27326
125559326	1.11.1.7	A2YP51_ORYSI	OsI_27041
125559323	1.11.1.7	A2YP48_ORYSI	OsI_27038
125559322	1.11.1.7	A2YP47_ORYSI	OsI_27037
125559321	1.11.1.7	A2YP46_ORYSI	OsI_27036
125558613	1.11.1.7	A2YM38_ORYSI	OsI_26291
125557286	1.11.1.7	A2YIB1_ORYSI	OsI_24947
125557285	1.11.1.7	A2YIB0_ORYSI	OsI_24946
125556945	1.11.1.7	A2YHC0_ORYSI	OsI_24586
125556944	1.11.1.7	A2YHB9_ORYSI	OsI_24585
125556943	1.11.1.7	A2YHB8_ORYSI	OsI_24584
125556609	1.11.1.7	A2YGK4_ORYSI	OsI_24309
125556607	1.11.1.7	A2YGK2_ORYSI	OsI_24307
125556606	1.11.1.7	A2YGK1_ORYSI	OsI_24306
125555674	1.11.1.7	A2YDW9_ORYSI	OsI_23303
125555673	1.11.1.7	A2YDW8_ORYSI	OsI_23302
125555553	1.11.1.7	A2YDJ8_ORYSI	OsI_23187
125555552	1.11.1.7	A2YDJ7_ORYSI	OsI_23186
125555550	1.11.1.7	A2YDJ5_ORYSI	OsI_23185
125555549	1.11.1.7	A2YDJ4_ORYSI	OsI_23184
125555548	1.11.1.7	A2YDJ3_ORYSI	OsI_23183
125555546	1.11.1.7	A2YDJ1_ORYSI	OsI_23181
125555398	1.11.1.7	A2YD43_ORYSI	OsI_23038
125555316	1.11.1.7	A2YCW1_ORYSI	OsI_22951
125555057	1.11.1.7	A2YC52_ORYSI	OsI_22684
125554918	1.11.1.7	A2YBR3_ORYSI	OsI_22542
125554697	1.11.1.7	A2YB42_ORYSI	OsI_22319
125552869	1.11.1.7	A2Y668_ORYSI	OsI_20491
125552868	1.11.1.7	A2Y667_ORYSI	OsI_20490
125551432	1.11.1.7	A2Y231_ORYSI	OsI_19063
125550947	1.11.1.7	A2Y0P6_ORYSI	OsI_18569
125550753	1.11.1.7	A2Y052_ORYSI	OsI_18359
125550762,125550750	1.11.1.7	A2Y049_ORYSI	OsI_18356 OsI_18369
125550746	1.11.1.7	A2Y045_ORYSI	OsI_18350
125550745	1.11.1.7	A2Y044_ORYSI	OsI_18349
125550744	1.11.1.7	A2Y043_ORYSI	OsI_18348
125550743	1.11.1.7	A2Y042_ORYSI	OsI_18347
125550319	1.11.1.7	A2XZ81_ORYSI	OsI_18020
125550317	1.11.1.7	A2XZ79_ORYSI	OsI_18018
125550051	1.11.1.7	A2XYG3_ORYSI	OsI_17739
125549843	1.11.1.7	A2XXV5_ORYSI	OsI_17531
125548897	1.11.1.7	A2XV59_ORYSI	OsI_16496
125548636	1.11.1.7	A2XUE8_ORYSI	OsI_16228
125548313	1.11.1.7	A2XTH5_ORYSI	OsI_15908
125548311	1.11.1.7	A2XTH3_ORYSI	OsI_15906
125545811	1.11.1.7	A2XM90_ORYSI	OsI_13637
125545810	1.11.1.7	A2XM89_ORYSI	OsI_13636
125544528	1.11.1.7	A2XIK7_ORYSI	OsI_12268
125544436	1.11.1.7	A2XIB5_ORYSI	OsI_12176
125544033	1.11.1.7	A2XH62_ORYSI	OsI_11737
125544032	1.11.1.7	A2XH61_ORYSI	OsI_11736
125544030	1.11.1.7	A2XH59_ORYSI	OsI_11734
125544029	1.11.1.7	A2XH58_ORYSI	OsI_11733
125544026	1.11.1.7	A2XH55_ORYSI	OsI_11730
125544024	1.11.1.7	A2XH53_ORYSI	OsI_11729
125544023	1.11.1.7	A2XH52_ORYSI	OsI_11727
125544022	1.11.1.7	A2XH51_ORYSI	OsI_11726
125543026	1.11.1.7	A2XEA5_ORYSI	OsI_10661
125543025	1.11.1.7	A2XEA4_ORYSI	OsI_10660
125543023	1.11.1.7	A2XEA2_ORYSI	OsI_10658
125542441	1.11.1.7	A2XCM0_ORYSI	OsI_10053
125542177	1.11.1.7	A2XBV6_ORYSI	OsI_09775
125541756	1.11.1.7	A2XBE1_ORYSI	OsI_09586
125541081	1.11.1.7	A2X9G6_ORYSI	OsI_08884
125538756	1.11.1.7	A2X2U1_ORYSI	OsI_06506
125538754	1.11.1.7	A2X2T9_ORYSI	OsI_06504
125538753	1.11.1.7	A2X2T8_ORYSI	OsI_06503
125538747	1.11.1.7	A2X2T2_ORYSI	OsI_06497
125538746	1.11.1.7	A2X2T1_ORYSI	OsI_06496
125538745	1.11.1.7	A2X2T0_ORYSI	OsI_06495
125538188	1.11.1.7	A2X173_ORYSI	OsI_05954
125536027	1.11.1.7	A2ZIT1_ORYSI	OsI_37734
125535535	1.11.1.7	A2ZHD9_ORYSI	OsI_37207
125535203	1.11.1.7	A2ZGL7_ORYSI	OsI_36925
125533780	1.11.1.7	A2ZCJ4_ORYSI	OsI_35498
125533145	1.11.1.7	A2ZAQ9_ORYSI	OsI_34840
125533143	1.11.1.7	A2ZAQ7_ORYSI	OsI_34838
125529222	1.11.1.7	A2WZE0_ORYSI	OsI_05318
125529221	1.11.1.7	A2WZD9_ORYSI	OsI_05317
125529218	1.11.1.7	A2WZD6_ORYSI	OsI_05314
125527983	1.11.1.7	A2WVV1_ORYSI	OsI_04022
125526325	1.11.1.7	A2WR43_ORYSI	OsI_02330
125525691	1.11.1.7	A2WPA9_ORYSI	OsI_01682
125525685	1.11.1.7	A2WPA3_ORYSI	OsI_01678
125525684	1.11.1.7	A2WPA2_ORYSI	OsI_01677
125525683	1.11.1.7	A2WPA1_ORYSI	OsI_01676
125525682	1.11.1.7	A2WPA0_ORYSI	OsI_01675
125525504	1.11.1.7	A2WNS2_ORYSI	OsI_01506
125525502	1.11.1.7	A2WNS0_ORYSI	OsI_01504
125525500	1.11.1.7	A2WNR8_ORYSI	OsI_01501
125525499	1.11.1.7	A2WNR7_ORYSI	OsI_01500
125525498	1.11.1.7	A2WNR6_ORYSI	OsI_01498
125525497	1.11.1.7	A2WNR5_ORYSI	OsI_01497
125525347	1.11.1.7	A2WNB5_ORYSI	OsI_01340
125525283	1.11.1.7	A2WN51_ORYSI	OsI_01277
125525281	1.11.1.7	A2WN49_ORYSI	OsI_01276
125525256	1.11.1.7	A2WN24_ORYSI	OsI_01248
125524611	1.11.1.7	A2WL79_ORYSI	OsI_00589
116312057,116312014	1.11.1.7	Q00RG2_ORYSA	H0303G06.10 OSIGBa0117N13.15
116311982	1.11.1.7	Q00RN3_ORYSA	H0814G11.7
116310124	1.11.1.7	Q01JD4_ORYSA	OSIGBa0130P02.5
116309644	1.11.1.7	Q01KM6_ORYSA	OSIGBa0158D24.3
116309410	1.11.1.7	Q01L85_ORYSA	OSIGBa0076I14.7
116311964,90399368	1.11.1.7	Q25AM6_ORYSA	H0212B02.16 OSIGBa0113E10.6
116311981,90399027	1.11.1.7	Q259L6_ORYSA	H0701F11.13 H0814G11.6
116311980,90399026	1.11.1.7	Q259L7_ORYSA	H0701F11.12 H0814G11.5
116311979,90399025	1.11.1.7	Q9ST81_ORYSA	q3037.16 H0701F11.11 H0814G11.4
116311978,90399024	1.11.1.7	Q259L9_ORYSA	H0701F11.10 H0814G11.3
221327777	1.11.1.7	B9V0M3_ORYSI	OSI9Ba083O10_092B13-7
8901180	1.11.1.7	Q9LKY9_ORYSA
2429294	1.11.1.7	O22442_ORYSA	POX3006
218200255,2429292	1.11.1.7	B8B5W8_ORYSI	OsI_27327
2429290	1.11.1.7	O22440_ORYSA	POX5.1
2429288	1.11.1.7	O22439_ORYSA	POX8.1
2429286	1.11.1.7	O22438_ORYSA	POX22.3
218198892,258644662	1.11.1.7	B8B2I9_ORYSI	K0155E09.17 OsI_24482
158513657	1.11.1.7	PER2_ORYSI	PRX112 POXGX9 OsI_026366
218184489	3.6.1.1	B8BGR4_ORYSI	OsI_33514
218195974	3.6.1.1	B8AXA3_ORYSI	OsI_18190
218195868	3.6.1.1	B8ARU1_ORYSI	OsI_18011
218190921	3.6.1.1	B8AJF2_ORYSI	OsI_07556
218189841	3.6.1.1	B8A9Z0_ORYSI	OsI_05422
125556248	3.6.1.1	A2YFJ3_ORYSI	OsI_23875
125554291	3.6.1.1	A2Y9Y6_ORYSI	OsI_21891
125552482	3.6.1.1	A2Y531_ORYSI	OsI_20104
125550914	3.6.1.1	A2Y0L3_ORYSI	Chalk5 OsI_18536
125541505	3.6.1.1	A2XAP0_ORYSI	OsI_09320
125541275	3.6.1.1	A2XA10_ORYSI	OsI_09082
125528495	3.6.1.1	A2WXB3_ORYSI	OsI_04559
125527526	3.6.1.1	A2WUJ4_ORYSI	OsI_03545
125526711	3.6.1.1	A2WS79_ORYSI	OsI_02715
125525749	3.6.1.1	A2WPG7_ORYSI	OsI_01741
90399018	3.6.1.1	Q259L2_ORYSA	H0701F11.4
125540818,2570501,158512873	3.6.1.1	IPYR_ORYSI	IPP OsI_008446
125532872	2.6.1.42	A2ZA03_ORYSI	OsI_34568
218197253	2.6.1.42	B8AWI0_ORYSI	OsI_20943
218195362	2.6.1.42	B8ASX0_ORYSI	OsI_16961
125542999	2.6.1.42	A2XE78_ORYSI	OsI_10629
125542062	2.6.1.42	A2XBJ1_ORYSI	OsI_09649
116311125	2.6.1.42	Q01H95_ORYSA	B0103C08-B0602B01.8
149391259	2.7.4.6	A6N077_ORYSI
218191001	2.7.4.6	B8ADZ7_ORYSI	OsI_07703
125536940	2.7.4.6	A2ZLE4_ORYSI	OsI_38642
125532983	2.5.1.54	A2ZAB4_ORYSI	OsI_34677
218194526	2.5.1.54	B8ARY1_ORYSI	OsI_15236
125561952	2.5.1.54	A2YWD9_ORYSI	OsI_29650
125559215	2.5.1.54	A2YNU0_ORYSI	OsI_26913
125544157	2.5.1.54	A2XHI6_ORYSI	OsI_11871
218191436	2.7.1.48	B8AHA3_ORYSI	OsI_08637
218185054	2.7.1.40	B8BIC8_ORYSI	OsI_34729
218199187	2.7.1.40	B8B7Z2_ORYSI	OsI_25125
218189386	2.7.1.40	B8ACE9_ORYSI	OsI_04452
218187972	2.7.1.40	B8ACJ0_ORYSI	OsI_01382
218186432	2.7.1.40	KPYC2_ORYSI	OsI_37456
218185457	2.7.1.40	B8BJP8_ORYSI	OsI_35538
218185248	2.7.1.40	KPYC1_ORYSI	OsI_35105
125550231	2.7.1.40	A2XYZ3_ORYSI	OsI_17926
125545206	2.7.1.40	A2XKI5_ORYSI	OsI_12966
90399037	2.7.1.40	Q259K4_ORYSA	H0402C08.9
125541741	2.7.1.39	A2XBC6_ORYSI	OsI_09571
218198523	4.1.2.13	B8B4J4_ORYSI	OsI_23662
218196772	4.1.2.13	B8AY35_ORYSI	OsI_19907
125559975	4.1.2.13	A2YQR2_ORYSI	OsI_27635
125548604	4.1.2.13	A2XUB6_ORYSI	OsI_16195
125533557	4.1.2.13	A2ZBX1_ORYSI	OsI_35277
218200214	1.15.1.1	B8B5M4_ORYSI	OsI_27243
218199316	1.15.1.1	B8B8G3_ORYSI	OsI_25396
218197542	1.15.1.1	B8B2C9_ORYSI	OsI_21593
218197449	1.15.1.1	B8B1M4_ORYSI	OsI_21381
218196558	1.15.1.1	B8AWM4_ORYSI	OsI_19472
218192832	1.15.1.1	B8APH0_ORYSI	OsI_11574
125562572	1.15.1.1	A2YY59_ORYSI	OsI_30285
601871	1.15.1.1	Q43803_ORYSA	rmsod2
66775540,158513198	1.15.1.1	SODC1_ORYSI	SODCC1 SODCC.1 OsI_011239
125545442	3.1.1.4	A2XL71_ORYSI	OsI_13216
125541738	3.1.1.4	A2XBC3_ORYSI	OsI_09568
125534703	3.1.1.4	A2ZF67_ORYSI	OsI_36430
218202291	4.2.1.1	B8BCM5_ORYSI	OsI_31683
218201293	4.2.1.1	B8BBK8_ORYSI	OsI_29556
125561855	4.2.1.1	A2YW42_ORYSI	OsI_29552
125561590	4.2.1.1	A2YVC7_ORYSI	OsI_29285
125561589	4.2.1.1	A2YVC6_ORYSI	OsI_29284
125527007	4.2.1.1	A2WT25_ORYSI	OsI_03015
5917783	4.2.1.1	Q40628_ORYSA
218201757	4.1.1.48	B8BDF0_ORYSI	OsI_30567
218200934	4.1.1.48	B8B9Q2_ORYSI	OsI_28767
218195015	4.1.1.48	B8AV46_ORYSI	OsI_16244
116310356,116309729	4.1.1.48	Q01IS1_ORYSA	OSIGBa0128P10.3 OSIGBa0115M15.12
258644642	4.1.1.48	C8TFG9_ORYSI	K0155C03.28
218190570	4.2.1.10	B8AG77_ORYSI	OsI_06912
218200990	2.7.2.4	B8B9V9_ORYSI	OsI_28878
218194118	2.7.2.4	B8ANP4_ORYSI	OsI_14341
218191893	2.7.2.4	B8AKZ6_ORYSI	OsI_09598
218189658	2.7.2.4	B8A8I6_ORYSI	OsI_05030
218191100	1.1.1.3	B8AES5_ORYSI	OsI_07919
218186352	1.1.1.3	B8BLT4_ORYSI	OsI_37318
218184697	4.99.1.1	B8BHC5_ORYSI	OsI_33935
218196638	4.99.1.1	B8AXD8_ORYSI	OsI_19638
152032525	4.99.1.1	HEMH_ORYSI	HEMH OsI_018948
218201004	2.7.1.90	B8B9Z2_ORYSI	PFP-ALPHA OsI_28900
218198082	2.7.1.90	B8B1A6_ORYSI	PFP-ALPHA OsI_22776
218191459	2.7.1.90	B8AHL5_ORYSI	PFP-ALPHA OsI_08678
125554746	2.7.1.90	A2YB91_ORYSI	PFP-BETA OsI_22368
218197128	2.7.1.11	B8B024_ORYSI	PFK OsI_20679
218189021	2.7.1.11	B8A9G5_ORYSI	PFK OsI_03669
125524745	2.7.1.11	A2WLL3_ORYSI	PFK OsI_00730
262344414,262344410	2.7.7.27	D0TZC9_ORYSI	AGPsma
110808312	2.7.7.27	A7IZE4_ORYSI
262344422,262344420,262344418,262344416,262344412,262344408,218201871	2.7.7.27	B8BE16_ORYSI	AGPsma OsI_30783
218193706	2.7.7.27	B8AR31_ORYSI	OsI_13419
125561204	2.7.7.27	A2YU91_ORYSI	OsI_28901
125557819	2.7.7.27	A2YJU4_ORYSI	OsI_25494
262344394,262344392,262344390,262344388,262344386,262344384,262344382,262344380,125553462	2.7.7.27	A2Y7W1_ORYSI	AGPlar OsI_21129
291212883	2.7.7.27	D4AIA3_ORYSI	OsAGPS2
217075940	2.7.7.27	B8XEF2_ORYSI	AGPase
217075936	2.7.7.27	B8XEF0_ORYSI	AGPase
217075934	2.7.7.27	B8XEE9_ORYSI	AGPase
217075924,217075918	2.7.7.27	B8XEE1_ORYSI	AGPase
217075916,217075914	2.7.7.27	B8XED9_ORYSI	AGPase
217075910	2.7.7.27	B8XED7_ORYSI	AGPase
215981489	2.7.7.27	B8XED5_ORYSI	AGPase
215981483	2.7.7.27	B8XED2_ORYSI	AGPase
215981481	2.7.7.27	B8XED1_ORYSI	AGPase
215981477	2.7.7.27	B8XEC9_ORYSI	AGPase
262344366,262344364,262344362,262344360,262344358,262344356,262344354,262344352,218188716,2149019,215981485,215981471	2.7.7.27	P93430_ORYSI	AGPiso AGPase OsI_02968
215981469	2.7.7.27	B8XEC5_ORYSI	AGPase
215981463	2.7.7.27	B8XEC2_ORYSI	AGPase
215981461	2.7.7.27	B8XEC1_ORYSI	AGPase
27948554	4.1.1.31	Q84XH0_ORYSI	PEPC
218190390	4.1.1.31	B8AEX3_ORYSI	OsI_06526
125563186	4.1.1.31	A2YZQ5_ORYSI	OsI_30839
125561305	4.1.1.31	A2YUJ2_ORYSI	OsI_28997
125527770	4.1.1.31	A2WV88_ORYSI	OsI_03803
125527682	4.1.1.31	A2WV00_ORYSI	OsI_03712
125524860	4.1.1.31	A2WLX8_ORYSI	OsI_00846
218202485	5.1.3.2	B8BDM3_ORYSI	OsI_32110
218202484	5.1.3.2	B8BDM2_ORYSI	OsI_32109
218201928	5.1.3.2	B8BEF8_ORYSI	OsI_30878
125561347	5.1.3.2	A2YUN4_ORYSI	OsI_29040
125553562	5.1.3.2	A2Y861_ORYSI	OsI_21235
218196720	2.7.1.23	B8AXU5_ORYSI	OsI_19811
218189762	2.7.1.23	B8A9I2_ORYSI	OsI_05264
218185405	2.7.1.23	B8BJJ6_ORYSI	OsI_35426
125531918	2.3.1.48	A2Z799_ORYSI	OsI_33575
218201983	2.3.1.48	B8BEQ1_ORYSI	OsI_30998
218190015	2.3.1.48	B8AHD6_ORYSI	OsI_05772
125559242	2.3.1.48	A2YNW7_ORYSI	OsI_26946
125556680	2.3.1.48	A2YGS5_ORYSI	OsI_24386
125548774	2.3.1.48	A2XUT6_ORYSI	OsI_16373
116310479,90265118	2.3.1.48	Q01IF8_ORYSA	H0805A05.12 H0811E11.1
125529284	1.1.1.8	A2WZK2_ORYSI	OsI_05386
218202009	5.4.4.2	B8BET1_ORYSI	OsI_31053
149391157	2.1.1.43	A6N026_ORYSI
218202612	2.1.1.43	B8BED6_ORYSI	OsI_32352
218202015	2.1.1.43	B8BET7_ORYSI	OsI_31060
218201888	2.1.1.43	B8BE77_ORYSI	OsI_30811
218201707	2.1.1.43	B8BD65_ORYSI	OsI_30479
218201622	2.1.1.43	B8B9M4_ORYSI	OsI_30315
218201221	2.1.1.43	B8BBB4_ORYSI	OsI_29393
218201112	2.1.1.43	B8BAJ1_ORYSI	OsI_29152
218200574	2.1.1.43	B8BBD3_ORYSI	OsI_28046
218197961	2.1.1.43	B8B0K4_ORYSI	OsI_22514
218195903	2.1.1.43	B8AS58_ORYSI	OsI_18069
218195645	2.1.1.43	B8AUU6_ORYSI	OsI_17540
218195644	2.1.1.43	B8AUU5_ORYSI	OsI_17537
218195308	2.1.1.43	B8ASM5_ORYSI	OsI_16848
218194855	2.1.1.43	B8ATS7_ORYSI	OsI_15918
218192666	2.1.1.43	B8AMH4_ORYSI	OsI_11249
218191440	2.1.1.43	B8AHA7_ORYSI	OsI_08641
218191189	2.1.1.43	B8AFI2_ORYSI	OsI_08112
218191149	2.1.1.43	B8AFD7_ORYSI	OsI_08033
218190961	2.1.1.43	B8AJE9_ORYSI	OsI_07633
218189799	2.1.1.43	B8A9M3_ORYSI	OsI_05333
218189651	2.1.1.43	B8A8H4_ORYSI	OsI_05022
218189129	2.1.1.43	B8AA57_ORYSI	OsI_03909
218188776	2.1.1.43	B8A6V0_ORYSI	OsI_03117
218187758	2.1.1.43	B8AAL0_ORYSI	OsI_00917
218187240	2.1.1.43	B8BMZ6_ORYSI	OsI_39097
218186017	2.1.1.43	B8BLA8_ORYSI	OsI_36654
218185169	2.1.1.43	B8BIW1_ORYSI	OsI_34964
125560527	2.1.1.43	A2YSB4_ORYSI	OsI_28216
125558133	2.1.1.43	A2YKQ8_ORYSI	OsI_25806
125552806	2.1.1.43	A2Y605_ORYSI	OsI_20427
125537874	2.1.1.43	A2X0A9_ORYSI	OsI_05649
125535660	2.1.1.43	A2ZHR4_ORYSI	OsI_37343
125528115	2.1.1.43	A2WW83_ORYSI	OsI_04165
116309320	2.1.1.43	Q01LG5_ORYSA	OSIGBa0093L02.2
116312063,90399291	2.1.1.43	Q25A43_ORYSA	H0323C08.3 H0303G06.16
29565495	2.1.1.43	Q84UI6_ORYSI	ez1
218184182	4.2.1.11	B8BFV2_ORYSI	OsI_32842
218197519	4.2.1.11	B8B2A2_ORYSI	OsI_21538
218192500	4.2.1.11	B8AKN2_ORYSI	OsI_10877
218192440	4.2.1.11	B8AK24_ORYSI	OsI_10758
125563499	4.2.1.11	A2Z0L8_ORYSI	OsI_31140
125563598	5.3.1.8	A2Z0W7_ORYSI	OsI_31243
125534942	5.3.1.8	A2ZFV6_ORYSI	OsI_36663
125563769	4.1.1.50	A2Z1D8_ORYSI	OsI_31419
125550797	4.1.1.50	A2Y096_ORYSI	OsI_18408
125540256	4.1.1.50	A2X741_ORYSI	OsI_08032
90265128	4.1.1.50	I7HIN8_ORYSA	H0711G06.2
62199789,125548896,158513182	4.1.1.50	DCAM_ORYSI	SAMDC OsI_015951
218202242	6.3.4.3	B8BCI1_ORYSI	OsI_31573
218202254	1.14.17.4	B8BCI9_ORYSI	OsI_31599
218196096	1.14.17.4	B8AY41_ORYSI	OsI_18467
125541295	1.14.17.4	A2XA30_ORYSI	OsI_09105
125533680	1.14.17.4	A2ZC94_ORYSI	OsI_35404
125563950,755773,148886766	1.14.17.4	ACCO1_ORYSI	ACO1 OsI_030562
218201300,114329478	1.14.13.93	B8BBL9_ORYSI	OsI_29568
125563993,152126081	1.14.13.93	ABAH3_ORYSI	CYP707A7 ABA8OX3 OsI_030605
125540809,114329476,122166104	1.14.13.93	ABAH1_ORYSI	CYP707A5 ABA8OX1 OsI_008437
122166103	1.14.13.93	ABAH2_ORYSI	CYP707A6 ABA8OX2 OsI_028552
218202276	3.2.1.1	B8BCL1_ORYSI	OsI_31647
218201301	3.2.1.1	B8BBM0_ORYSI	OsI_29570
125563996	3.2.1.1	A2Z215_ORYSI	OsI_31649
125563995	3.2.1.1	A2Z214_ORYSI	OsI_31648
125561875	3.2.1.1	A2YW62_ORYSI	OsI_29572
125561873	3.2.1.1	A2YW60_ORYSI	OsI_29569
125541259	3.2.1.1	A2X9Z4_ORYSI	OsI_09066
148886781	3.2.1.1	AMYC1_ORYSI	AMYC AMY1B OsI_001836
125556737,20173,148886780	3.2.1.1	AMY2A_ORYSI	AMYC2 AMY1.5 AMY2A OsI_023575
218202294	5.3.1.9	B8BCM8_ORYSI	OsI_31689
218197916	5.3.1.9	B8B0B0_ORYSI	OsI_22416
218193835	5.3.1.9	B8AKL0_ORYSI	OsI_13718
125561917	5.3.1.9	A2YWA4_ORYSI	OsI_29615
218202296	6.3.2.6	B8BCN0_ORYSI	OsI_31696
125564062	2.4.2.29	A2Z281_ORYSI	OsI_31716
218184335	3.2.1.23	B8BGB0_ORYSI	OsI_33138
218184317	3.2.1.23	B8BG92_ORYSI	OsI_33101
218202538	3.2.1.23	B8BE55_ORYSI	OsI_32205
218201568	3.2.1.23	B8B9D8_ORYSI	OsI_30162
218197179	3.2.1.23	B8AW61_ORYSI	OsI_20800
218196839	3.2.1.23	B8AYI0_ORYSI	OsI_20049
218192153	3.2.1.23	B8ANX7_ORYSI	OsI_10152
218189749	3.2.1.23	B8A982_ORYSI	OsI_05227
218189464	3.2.1.23	B8A713_ORYSI	OsI_04635
218188525	3.2.1.23	B8AAQ6_ORYSI	OsI_02561
218188392	3.2.1.23	B8A9N7_ORYSI	OsI_02284
125556152	3.2.1.23	A2YF97_ORYSI	OsI_23787
125555810	3.2.1.23	A2YEA5_ORYSI	OsI_23450
125543160	3.2.1.23	A2XEN9_ORYSI	OsI_10800
125536446	3.2.1.23	A2ZK00_ORYSI	OsI_38151
156106159	3.2.1.23	A7UF34_ORYSI
183604889	3.2.1.23	B2Z6M9_ORYSI	Bgal6
125538642,152013361	3.2.1.23	BGAL4_ORYSI	OsI_006270
218201443	1.1.1.34	B8BCC8_ORYSI	OsI_29857
218191458	1.1.1.34	B8AHL4_ORYSI	OsI_08675
125564213	1.1.1.34	A2Z2N2_ORYSI	OsI_31874
1171364	1.1.1.34	Q7DMK0_ORYSI	HMGR
1154889	1.1.1.34	Q42466_ORYSA
455459,158513199	1.1.1.34	HMDH1_ORYSI	HMG1 OsI_008506
218192168	5.1.3.1	B8APA6_ORYSI	OsI_10180
125564291	5.1.3.1	A2Z2W0_ORYSI	OsI_31954
116311131	3.2.1.51	Q01H89_ORYSA	B0103C08-B0602B01.14
218191973	2.3.3.10	B8ALW2_ORYSI	OsI_09754
125564412	2.3.3.10	A2Z381_ORYSI	OsI_32080
125562415	2.3.3.10	A2YXQ2_ORYSI	OsI_30125
218202494	3.1.1.31	B8BDS9_ORYSI	OsI_32125
152126071	3.1.1.31	6PGL4_ORYSI	OsI_031067
218201561,152126070	3.1.1.31	6PGL3_ORYSI	OsI_30141
125559099,158513646	3.1.1.31	6PGL2_ORYSI	OsI_025867
125544325,158513209	3.1.1.31	6PGL1_ORYSI	OsI_011697
218202514	2.7.1.33	B8BDU9_ORYSI	OsI_32156
218197779	2.7.1.33	B8B3X4_ORYSI	OsI_22093
125564529	4.2.3.4	A2Z3J8_ORYSI	OsI_32204
114848914	2.7.7.9	A4KC21_ORYSI
88866516,218202595	2.7.7.9	A3QQQ3_ORYSI	UGP OsI_32322
218189925	2.7.7.9	B8AGI4_ORYSI	OsI_05593
218187935	2.7.7.9	B8AC68_ORYSI	OsI_01290
218187932	2.7.7.9	B8AC65_ORYSI	OsI_01283
7417426	2.7.7.9	Q9M4X0_ORYSI	UDPGase
218202598	2.4.2.19	B8BEC2_ORYSI	OsI_32326
218202624	4.1.2.25	B8BEF2_ORYSI	OsI_32385
125562518	4.1.2.25	A2YY05_ORYSI	OsI_30221
125564749	1.6.5.4	A2Z468_ORYSI	OsI_32437
125540834	1.6.5.4	A2X8R9_ORYSI	OsI_08631
218200479,296511909,296511725	1.6.5.4	B8BAQ6_ORYSI	OsI_27818
125562536,296511891,296511707	1.6.5.4	A2YY23_ORYSI	OsI_30244
149391151	1.2.1.12	A6N023_ORYSI
218191114	1.2.1.12	B8AF09_ORYSI	OsI_07948
218190154	1.2.1.12	B8AII9_ORYSI	OsI_06028
125556399	1.2.1.12	A2YFZ4_ORYSI	OsI_24036
125548785	1.2.1.12	A2XUU7_ORYSI	OsI_16384
90265255	1.2.1.12	G3PC2_ORYSJ	GAPC2 GAPDH Os04g0486600 LOC_Os04g40950 H0302E05.3 OJ000223_09.15
125560000,152032492	1.2.1.12	G3PC_ORYSI	GAPC GPC OsI_026680
218193906	4.2.1.20	B8ALB1_ORYSI	OsI_13902
125560064	4.2.1.20	A2YR01_ORYSI	OsI_27728
125557458	4.2.1.20	A2YIT3_ORYSI	OsI_25135
125556163	4.2.1.20	A2YFA8_ORYSI	OsI_23796
125546046	4.2.1.20	A2XMX5_ORYSI	OsI_13901
125546045	4.2.1.20	A2XMX4_ORYSI	OsI_13900
125546044	4.2.1.20	A2XMX3_ORYSI	OsI_13899
218197433	1.1.1.44	B8B1K3_ORYSI	OsI_21345
125534395	1.1.1.44	A2ZEA9_ORYSI	OsI_36123
125560205	2.1.1.76	A2YRE2_ORYSI	OsI_27880
218200594	4.2.1.3	B8BBF3_ORYSI	OsI_28098
218192045	4.2.1.3	B8AMU2_ORYSI	OsI_09921
125560417	6.3.4.13	A2YS04_ORYSI	OsI_28100
125536060	6.3.4.13	A2ZIW4_ORYSI	OsI_37769
218196491	4.4.1.5	B8AW52_ORYSI	OsI_19332
125560421	4.4.1.5	A2YS08_ORYSI	OsI_28106
125538981	4.4.1.5	A2X3G6_ORYSI	OsI_06754
125544371	1.14.19.2	A2XI50_ORYSI	OsI_12110
125560484,313471486	1.14.19.2	STAD6_ORYSI	OsI_28171
125548002,313471483	1.14.19.2	STAD5_ORYSI	OsI_15603
125560489,313471480	1.14.19.2	STAD7_ORYSI	OsI_28174
218190812,313471478	1.14.19.2	STAD3_ORYSI	OsI_07337
125528886,313471474	1.14.19.2	STAD2_ORYSI	SSI2 OsI_04956
218189473,313471473	1.14.19.2	STAD1_ORYSI	OsI_04666
125561726	6.2.1.12	A2YVR3_ORYSI	OsI_29419
125560727	6.2.1.12	A2YSW4_ORYSI	OsI_28412
125560726	6.2.1.12	A2YSW3_ORYSI	OsI_28410
125556329	6.2.1.12	A2YFS4_ORYSI	OsI_23962
125540773	6.2.1.12	A2X8K8_ORYSI	OsI_08569
125538312	6.2.1.12	A2X1J7_ORYSI	OsI_06077
218191426	2.1.3.3	B8AH93_ORYSI	OsI_08616
125560751	2.1.3.2	A2YSY8_ORYSI	OsI_28439
218189618	2.4.1.14	B8A8E2_ORYSI	OsI_04951
125561032	2.4.1.14	A2YTR9_ORYSI	OsI_28718
258644657,258644444	2.4.1.14	C8TEV8_ORYSI	K0031E03.46 K0155E09.7
988270,158513190	2.4.1.14	SPSA1_ORYSI	SPS1 OsI_004842
218200912	2.7.1.137	B8B9J6_ORYSI	OsI_28732
218200952	6.3.5.2	B8B9S4_ORYSI	OsI_28793
218193962	6.6.1.1	CHLD_ORYSI	CHLD CHL1 OsI_14020
125544530	6.6.1.1	CHLI_ORYSI	CHLI CHL9 OsI_12270
218194996	1.2.1.8	B8AV58_ORYSI	OsI_16212
218200228	5.3.1.5	B8B5T6_ORYSI	OsI_27268
125553918	4.1.1.19	A2Y8W3_ORYSI	OsI_21492
125546953	4.1.1.19	A2XPL5_ORYSI	OsI_14579
116310897	4.1.1.19	Q01HV9_ORYSA	B0616E02-H0507E05.13
125527818	5.4.99.5	A2WVD6_ORYSI	OsI_03851
125561721	1.1.1.95	A2YVQ8_ORYSI	OsI_29415
125556326	1.1.1.95	A2YFS1_ORYSI	OsI_23958
125550010	1.1.1.95	A2XYC2_ORYSI	OsI_17701
116311962,90399366	1.1.1.95	Q25AL6_ORYSA	H0212B02.14 OSIGBa0113E10.4
218194937	4.1.1.15	B8AUD4_ORYSI	OsI_16074
218193660	4.1.1.15	B8AQQ2_ORYSI	OsI_13319
125561822	4.1.1.15	A2YW09_ORYSI	OsI_29517
125548479	4.1.1.15	A2XTZ1_ORYSI	OsI_16070
125543034	4.1.1.15	A2XEB3_ORYSI	OsI_10669
116310182	4.1.1.15	Q01J81_ORYSA	OSIGBa0152K17.6
116310178	4.1.1.15	Q01J85_ORYSA	OSIGBa0152K17.2
74100120,89280753	1.9.3.1	Q2F9A2_ORYSI	cox3
74100073,89280706	1.9.3.1	Q2F979_ORYSI	cox2
74100117,89280750,285026186	1.9.3.1	Q2F958_ORYSI	cox1 cox1-1 cox1-2
285026180,285026165	1.9.3.1	D3DF24_ORYSI	cox2
285026151	1.9.3.1	D3DF10_ORYSI	cox3
804815,13217,117070	1.9.3.1	COX3_ORYSI	COX3
218196454	2.1.2.2	B8B059_ORYSI	OsI_19244
125562066	2.1.2.2	A2YWQ3_ORYSI	OsI_29770
218201421	1.13.11.12	B8BCA6_ORYSI	OsI_29815
218196513	1.13.11.12	B8AWC1_ORYSI	OsI_19383
218190241	1.13.11.12	B8AJB1_ORYSI	OsI_06220
218187072	1.13.11.12	B8BMH9_ORYSI	OsI_38719
218187068	1.13.11.12	B8BMH5_ORYSI	OsI_38715
218185974	1.13.11.12	B8BL65_ORYSI	OsI_36563
125562120	1.13.11.12	A2YWV7_ORYSI	OsI_29820
125548478	1.13.11.12	A2XTZ0_ORYSI	OsI_16069
125545658	1.13.11.12	A2XLT7_ORYSI	OsI_13441
125545393	1.13.11.12	A2XL22_ORYSI	OsI_13165
125545390	1.13.11.12	A2XL19_ORYSI	OsI_13162
125545382	1.13.11.12	A2XL11_ORYSI	OsI_13155
125542639	1.13.11.12	A2XD68_ORYSI	OsI_10254
116310177	1.13.11.12	Q01J86_ORYSA	OSIGBa0152K17.1
190606635	1.13.11.12	B3VA21_ORYSI
18448903	1.13.11.12	Q8W0X0_ORYSI	Lox
187940686,187940688	1.13.11.12	B2ZUL4_ORYSI	LOX-3
161137615	1.13.11.12	A9QVF7_ORYSI
71154129	1.11.1.6	Q45RE7_ORYSI
218198913	1.11.1.6	B8B2L5_ORYSI	OsI_24526
218192022	1.11.1.6	B8AME2_ORYSI	OsI_09857
218189918	1.11.1.6	B8AGH7_ORYSI	OsI_05576
283050393	1.11.1.6	A3REN3_ORYSI	CatA
66968812,152013381	1.11.1.6	CATA2_ORYSI	CATB OsI_023657
20192,152013380	1.11.1.6	CATA1_ORYSI
218201512	5.4.3.8	B8B936_ORYSI	OsI_30021
218188450	3.5.1.88	B8AA31_ORYSI	OsI_02402
125562526	2.1.1.77	A2YY13_ORYSI	OsI_30232
125548747	2.1.1.77	A2XUQ9_ORYSI	OsI_16346
116309849,90265055	2.1.1.77	Q25AK0_ORYSA	H0510A06.5 OSIGBa0158F13.16
149391079	4.2.1.9	A6MZY7_ORYSI
125562556	4.2.1.9	A2YY43_ORYSI	OsI_30268
218198942	2.7.1.130	B8B6I3_ORYSI	OsI_24572
218190486	1.18.1.2	B8AFL4_ORYSI	OsI_06742
125557237	1.18.1.2	A2YI62_ORYSI	OsI_24896
125553745	1.18.1.2	A2Y8E0_ORYSI	OsI_21320
125545944	1.18.1.2	A2XMM3_ORYSI	OsI_13788
125537696	1.18.1.2	A2WZT1_ORYSI	OsI_05475
125557363	6.3.5.1	NADE_ORYSI	OsI_25032
125524645	1.14.11.15	A2WLB3_ORYSI	OsI_00624
15005015	1.14.11.15	Q94IE4_ORYSA	OsGA3ox2 D18
218199177	5.3.1.6	B8B7P6_ORYSI	OsI_25096
116309106,116308924	5.3.1.6	Q01M03_ORYSA	OSIGBa0096F13.7 OSIGBa0125J07.2
218199226	2.2.1.7	B8B7Y6_ORYSI	OsI_25196
218197541	2.2.1.7	B8B2C8_ORYSI	OsI_21592
218196788	2.2.1.7	B8AY88_ORYSI	OsI_19939
218199255	5.4.2.3	B8B864_ORYSI	OsI_25249
125546109	2.5.1.21	A2XN38_ORYSI	OsI_13969
218193955	2.1.1.41	B8ALT8_ORYSI	OsI_13994
125557636	2.1.1.41	A2YJB1_ORYSI	OsI_25325
218199295	2.4.1.119	B8B8E2_ORYSI	OsI_25342
218197117	2.4.1.119	B8B009_ORYSI	OsI_20658
125550210	2.4.1.119	A2XYX2_ORYSI	OsI_17905
90399055	2.4.1.119	Q259H1_ORYSA	H0103C06.8
218199468	2.5.1.16	B8B5H6_ORYSI	OsI_25717
218198315	2.5.1.16	B8B3A5_ORYSI	OsI_23221
218190429	2.5.1.16	B8AF89_ORYSI	OsI_06609
125538748	2.5.1.16	A2X2T3_ORYSI	OsI_06498
218184055	3.1.3.2	B8BFG7_ORYSI	OsI_32568
218200829	3.1.3.2	B8B909_ORYSI	OsI_28583
218198636	3.1.3.2	B8B0P6_ORYSI	OsI_23873
218194104	3.1.3.2	B8ANS7_ORYSI	OsI_14321
218187314	3.1.3.2	B8BN70_ORYSI	OsI_39267
218186443	3.1.3.2	B8BM28_ORYSI	OsI_37481
218185258	3.1.3.2	B8BJ49_ORYSI	OsI_35135
125560904	3.1.3.2	A2YTE1_ORYSI	OsI_28582
125548199	3.1.3.2	A2XT61_ORYSI	OsI_15799
125544561	3.1.3.2	A2XIP0_ORYSI	OsI_12303
125543049	3.1.3.2	A2XEC8_ORYSI	OsI_10684
125537551	3.1.3.2	A2ZN55_ORYSI	OsI_39269
125537550	3.1.3.2	A2ZN54_ORYSI	OsI_39268
125535786	3.1.3.2	A2ZI40_ORYSI	OsI_37483
125534717	3.1.3.2	A2ZF81_ORYSI	OsI_36444
125534716	3.1.3.2	A2ZF80_ORYSI	OsI_36442
125527907	3.1.3.2	A2WVM5_ORYSI	OsI_03945
116310141	3.1.3.2	Q01JB9_ORYSA	H0717B12.3
218199552	6.3.2.2	B8B5S6_ORYSI	OsI_25896
218196020,189042529	6.3.2.2	GSH1A_ORYSI	GSH1-1 OsI_18304
189042527	6.3.2.2	GSH1B_ORYSI	GSH1-2 OsI_025000
17529621,158513179	2.5.1.6	METK1_ORYSI	SAM1 SAMS OsI_017696
29826070	2.5.1.6	Q84P57_ORYSI
218199613	2.4.2.7	B8B626_ORYSI	OsI_26014
218191163	2.4.2.7	B8AFF1_ORYSI	OsI_08056
125548942	2.4.2.7	A2XVA4_ORYSI	OsI_16544
125537242	2.4.2.7	A2ZM96_ORYSI	OsI_38949
125537221	2.4.2.7	A2ZM75_ORYSI	OsI_38931
218199746	2.4.2.7	B8B6W9_ORYSI	OsI_26281
149392551	4.1.3.1	A6N1F8_ORYSI
125558706	5.3.3.2	A2YMD1_ORYSI	OsI_26387
125552337	5.3.3.2	A2Y4N6_ORYSI	OsI_19961
125558773	5.3.3.2	A2YMJ8_ORYSI	OsI_26450
218196803	1.10.99.1	B8AYA3_ORYSI	OsI_19972
218195979	3.2.1.52	B8AXA8_ORYSI	OsI_18203
125558904	3.2.1.52	A2YMX9_ORYSI	OsI_26587
218199920	3.2.1.52	B8B7U7_ORYSI	OsI_26654
125544415	2.3.1.1	A2XI94_ORYSI	OsI_12155
218194456	2.3.1.1	B8AR85_ORYSI	OsI_15088
218192801	2.4.1.13	B8APD5_ORYSI	OsI_11498
125559177	2.4.1.13	A2YNQ2_ORYSI	OsI_26874
125554396	2.4.1.13	A2YA91_ORYSI	OsI_22003
125544232	2.4.1.13	A2XHR1_ORYSI	OsI_11950
116309540	2.4.1.13	Q01KW8_ORYSA	H0211A12.6
218200202	2.4.1.13	B8B5K7_ORYSI	OsI_27219
218200064	2.4.1.25	B8B4V9_ORYSI	OsI_26949
149391021	2.4.1.25	A6MZV8_ORYSI
218190919	1.11.1.15	B8AJ36_ORYSI	OsI_07554
125556133	1.11.1.15	A2YF78_ORYSI	OsI_23767
125538439	1.11.1.15	A2X1X4_ORYSI	OsI_06200
125527234	1.11.1.15	A2WTQ2_ORYSI	OsI_03241
116310804	1.11.1.15	Q01I46_ORYSA	OSIGBa0092M08.6
218200095,158517776	1.11.1.15	REHYA_ORYSI	OsI_27030
218197740,158517782	1.11.1.15	PRXQ_ORYSI	OsI_22010
125559317,158517778	1.11.1.15	REHYB_ORYSI	OsI_026085
125559330	2.7.4.9	A2YP55_ORYSI	OsI_27045
218200182	1.4.7.1	B8B5I7_ORYSI	OsI_27183
218192662	2.5.1.43	B8AMH0_ORYSI	OsI_11242
125543565,11176990,4586378,158513194	2.5.1.43	NAS1_ORYSI	NAS1 OsI_010937
125559683,11176988,158513658	2.5.1.43	NAS3_ORYSI	NAS3 OsI_026451
11176991,11176986,158513195	2.5.1.43	NAS2_ORYSI	NAS2 OsI_010938
125559703	3.5.4.6	A2YQ78_ORYSI	OsI_27440
218194753	1.2.4.2	B8AT82_ORYSI	OsI_15669
116309350	1.2.4.2	Q01LD8_ORYSA	OSIGBa0096P03.7
218197395	1.13.11.5	B8B197_ORYSI	OsI_21275
125555269	1.3.3.6	A2YCR4_ORYSI	OsI_22900
125553705	1.3.3.6	A2Y8A0_ORYSI	OsI_21277
125551070	1.3.3.6	A2Y119_ORYSI	OsI_18704
218190622	1.14.13.79	B8AGM0_ORYSI	OsI_07000
163943849	1.14.13.79	D0PQ38_ORYSI	KAO
149390955	3.2.2.9	A6MZS5_ORYSI
125553777	3.2.2.9	A2Y8H2_ORYSI	OsI_21350
125553933	2.2.1.1	A2Y8X8_ORYSI	OsI_21507
125547501	2.2.1.1	A2XR63_ORYSI	OsI_15126
116309154	2.2.1.1	Q01LW1_ORYSA	OSIGBa0139I12.3
125553934	2.5.1.19	A2Y8X9_ORYSI	EPSPS OsI_21508
125553969	4.2.1.47	A2Y914_ORYSI	OsI_21549
218184665	4.2.2.2	B8BH93_ORYSI	OsI_33884
218198444	4.2.2.2	B8B435_ORYSI	OsI_23497
218194283	4.2.2.2	B8AV17_ORYSI	OsI_14719
125560938	4.2.2.2	A2YTH5_ORYSI	OsI_28615
125554021	4.2.2.2	A2Y966_ORYSI	OsI_21605
125554016	4.2.2.2	A2Y961_ORYSI	OsI_21600
125538608	4.2.2.2	A2X2E3_ORYSI	OsI_06363
116317811	4.2.2.2	Q01N16_ORYSA	OSIGBa0147B06.7
218197308	6.3.4.2	B8AWV2_ORYSI	OsI_21073
218197298	6.3.4.2	B8AWT8_ORYSI	OsI_21048
218188770	6.3.4.2	B8A6U4_ORYSI	OsI_03106
218187058	6.3.4.2	B8BMG5_ORYSI	OsI_38700
125526860	6.3.4.2	A2WSM8_ORYSI	OsI_02872
149392216	2.5.1.47	A6N135_ORYSI
218198394	2.5.1.47	B8B3T0_ORYSI	OsI_23400
218198393	2.5.1.47	B8B3S9_ORYSI	OsI_23398
218198392	2.5.1.47	B8B3S8_ORYSI	OsI_23397
218197590	2.5.1.47	B8B2R6_ORYSI	OsI_21687
218190337	2.5.1.47	B8AEL2_ORYSI	OsI_06412
218189270	2.5.1.47	B8ABA1_ORYSI	OsI_04195
125554100	2.5.1.47	A2Y9E5_ORYSI	OsI_21686
55233175,125547187	2.5.1.47	Q5UJF9_ORYSI	CAS OsI_14808
90265116	2.5.1.47	I7HIN6_ORYSA	H0806H05.11
218192783	4.1.1.37	B8AP06_ORYSI	OsI_11473
218188685	4.1.1.37	B8ABY1_ORYSI	OsI_02909
125525046	1.1.1.23	A2WMG4_ORYSI	OsI_01033
218198748	1.1.1.31	B8B1F8_ORYSI	OsI_24154
125554826	3.6.1.7	A2YBH1_ORYSI	OsI_22456
125554825	3.6.1.7	A2YBH0_ORYSI	OsI_22455
218197933	6.3.5.4	B8B0C7_ORYSI	OsI_22459
218192596	6.3.5.4	B8ALL8_ORYSI	OsI_11112
218198639	1.2.1.2	B8B0P9_ORYSI	OsI_23877
218198209	1.2.1.2	B8B2F2_ORYSI	OsI_23019
125555380	1.2.1.2	A2YD25_ORYSI	OsI_23021
125532407	2.6.1.1	A2Z8N8_ORYSI	OsI_34080
218198356	2.6.1.1	B8B3J3_ORYSI	OsI_23308
218191750	2.6.1.1	B8AEH4_ORYSI	OsI_09291
218190372	2.6.1.1	B8AEL7_ORYSI	OsI_06490
125528532	2.6.1.1	A2WXF0_ORYSI	OsI_04601
125527788	2.6.1.1	A2WVA6_ORYSI	OsI_03821
125555739	1.13.99.1	A2YE34_ORYSI	OsI_23379
9255932	3.1.3.16	Q9LKF8_ORYSI	PP2A
218184959	3.1.3.16	B8BI33_ORYSI	OsI_34528
218184950	3.1.3.16	B8BI24_ORYSI	OsI_34505
149391525	3.1.3.16	A6N0L0_ORYSI
218201831	3.1.3.16	B8BDS5_ORYSI	OsI_30712
218199687	3.1.3.16	B8B6G2_ORYSI	OsI_26135
218198894	3.1.3.16	B8B2J1_ORYSI	OsI_24486
218198667	3.1.3.16	B8B110_ORYSI	OsI_23932
218198486	3.1.3.16	B8B4B4_ORYSI	OsI_23583
218198309	3.1.3.16	B8B364_ORYSI	OsI_23211
218198308	3.1.3.16	B8B363_ORYSI	OsI_23210
218197699	3.1.3.16	B8B3G9_ORYSI	OsI_21897
218197307	3.1.3.16	B8AWV1_ORYSI	OsI_21069
218197172	3.1.3.16	B8AW54_ORYSI	OsI_20785
218196729	3.1.3.16	B8AXY9_ORYSI	OsI_19829
218195541	3.1.3.16	B8ATX1_ORYSI	OsI_17335
218195148	3.1.3.16	B8ARA8_ORYSI	OsI_16516
218194949	3.1.3.16	B8AUF1_ORYSI	OsI_16110
218194942	3.1.3.16	B8AUD9_ORYSI	OsI_16091
218194325	3.1.3.16	B8AV11_ORYSI	OsI_14820
218194034	3.1.3.16	B8AMR5_ORYSI	OsI_14190
218193795	3.1.3.16	B8AK89_ORYSI	OsI_13628
218193405	3.1.3.16	B8ANI2_ORYSI	OsI_12812
218192643	3.1.3.16	B8AM35_ORYSI	OsI_11197
218192529	3.1.3.16	B8AKR5_ORYSI	OsI_10943
218192243	3.1.3.16	B8AQ17_ORYSI	OsI_10348
218192162	3.1.3.16	B8APA0_ORYSI	OsI_10169
218191374	3.1.3.16	B8AGR1_ORYSI	OsI_08504
218191135	3.1.3.16	B8AF35_ORYSI	OsI_08002
218191134	3.1.3.16	B8AF29_ORYSI	OsI_08001
218191133	3.1.3.16	B8AF28_ORYSI	OsI_07998
218191109	3.1.3.16	B8AF04_ORYSI	OsI_07933
218191107	3.1.3.16	B8AF34_ORYSI	OsI_07930
218191106	3.1.3.16	B8AF33_ORYSI	OsI_07929
218191012	3.1.3.16	B8AEC6_ORYSI	OsI_07726
218190717	3.1.3.16	B8AHJ8_ORYSI	OsI_07171
218190324	3.1.3.16	B8AE78_ORYSI	OsI_06381
218190188	3.1.3.16	B8AIW8_ORYSI	OsI_06098
218190065	3.1.3.16	B8AHS3_ORYSI	OsI_05861
218189463	3.1.3.16	B8A712_ORYSI	OsI_04634
218189363	3.1.3.16	B8AC29_ORYSI	OsI_04415
218188887	3.1.3.16	B8A802_ORYSI	OsI_03347
218188781	3.1.3.16	B8A6V5_ORYSI	OsI_03122
218188669	3.1.3.16	B8ABW5_ORYSI	OsI_02880
218188536	3.1.3.16	B8AAR7_ORYSI	OsI_02579
218188446	3.1.3.16	B8AA22_ORYSI	OsI_02395
218188404	3.1.3.16	B8A9P9_ORYSI	OsI_02318
218188323	3.1.3.16	B8A8Y0_ORYSI	OsI_02161
218187260	3.1.3.16	B8BN16_ORYSI	OsI_39138
218187149	3.1.3.16	B8BMQ6_ORYSI	OsI_38886
218186570	3.1.3.16	B8BNK6_ORYSI	OsI_37776
218185830	3.1.3.16	B8BKS1_ORYSI	OsI_36281
218185510	3.1.3.16	B8BJV1_ORYSI	OsI_35657
125564679	3.1.3.16	A2Z3Z8_ORYSI	OsI_32363
125564007	3.1.3.16	A2Z226_ORYSI	OsI_31661
125563243	3.1.3.16	A2YZW2_ORYSI	OsI_30895
125563183	3.1.3.16	A2YZQ2_ORYSI	OsI_30836
125562160	3.1.3.16	A2YWZ7_ORYSI	OsI_29859
125559689	3.1.3.16	A2YQ64_ORYSI	OsI_27423
125558831	3.1.3.16	A2YMQ6_ORYSI	OsI_26509
125557014	3.1.3.16	A2YHI9_ORYSI	OsI_24661
125556625	3.1.3.16	A2YGM0_ORYSI	OsI_24328
125553547	3.1.3.16	A2Y846_ORYSI	OsI_21218
125553515	3.1.3.16	A2Y814_ORYSI	OsI_21182
125552586	3.1.3.16	A2Y5D5_ORYSI	OsI_20203
125551991	3.1.3.16	A2Y3P0_ORYSI	OsI_19622
125551205	3.1.3.16	A2Y1F4_ORYSI	OsI_18833
125550740	3.1.3.16	A2Y039_ORYSI	OsI_18344
125550563	3.1.3.16	A2XZL2_ORYSI	OsI_18171
125550076	3.1.3.16	A2XYI8_ORYSI	OsI_17761
125549482	3.1.3.16	A2XWU4_ORYSI	OsI_17129
125548161	3.1.3.16	A2XT23_ORYSI	OsI_15760
125547748	3.1.3.16	A2XRW0_ORYSI	OsI_15356
125546235	3.1.3.16	A2XNG4_ORYSI	OsI_14103
125546150	3.1.3.16	A2XN79_ORYSI	OsI_14010
125546148	3.1.3.16	A2XN77_ORYSI	OsI_14009
125544190	3.1.3.16	A2XHL9_ORYSI	OsI_11907
125544056	3.1.3.16	A2XH85_ORYSI	OsI_11759
125543447	3.1.3.16	A2XFH6_ORYSI	OsI_11115
125543302	3.1.3.16	A2XF31_ORYSI	OsI_10948
125543258	3.1.3.16	A2XEY7_ORYSI	OsI_10903
125542837	3.1.3.16	A2XDR6_ORYSI	OsI_10462
125542318	3.1.3.16	A2XC97_ORYSI	OsI_09922
125541489	3.1.3.16	A2XAM4_ORYSI	OsI_09304
125540739	3.1.3.16	A2X8H4_ORYSI	OsI_08534
125540415	3.1.3.16	A2X7K0_ORYSI	OsI_08187
125540162	3.1.3.16	A2X6U7_ORYSI	OsI_07938
125538845	3.1.3.16	A2X330_ORYSI	OsI_06613
125538667	3.1.3.16	A2X2K2_ORYSI	OsI_06419
125535907	3.1.3.16	A2ZIG1_ORYSI	OsI_37609
125535513	3.1.3.16	A2ZHB7_ORYSI	OsI_37184
125533125	3.1.3.16	A2ZAN9_ORYSI	OsI_34819
125529324	3.1.3.16	A2WZP2_ORYSI	OsI_05432
125527977	3.1.3.16	A2WVU5_ORYSI	OsI_04016
125525506	3.1.3.16	A2WNS4_ORYSI	OsI_01508
125524548	3.1.3.16	A2WL16_ORYSI	OsI_00528
116310860	3.1.3.16	Q01I02_ORYSA	OSIGBa0132E09-OSIGBa0108L24.16
116310173	3.1.3.16	Q01J89_ORYSA	H0815C01.7
116310073	3.1.3.16	Q01JH2_ORYSA	H0818E04.11
116309246	3.1.3.16	Q01LN1_ORYSA	OSIGBa0097I24.2
116310753,90265142	3.1.3.16	Q01I93_ORYSA	H0311C03.1 H0711G06.16
90265077	3.1.3.16	Q25AI4_ORYSA	H0702G05.9
3328364	3.1.3.16	O81444_ORYSA	kapp
5231210,158513200	3.1.3.16	PP2A3_ORYSI	PP2A3 OsI_006256
4530611,125546111,158513176	3.1.3.16	PP2A2_ORYSI	PP2A2 OsI_013483
56787114,56787112,223635524	3.1.3.16	P2C34_ORYSI	BIPP2C2 OsI_013174
5714762,158517785	3.1.3.16	PP2A4_ORYSI	PP2A4
125555819,1218054,3859548,158513157	3.1.3.16	PP2A1_ORYSI	PP2A1 OsI_022657
47525231,75124044	3.1.3.16	BIP2C_ORYSI	BIPP2C1
42416979	1.4.4.2	Q6RS61_ORYSI	GDC
125556045	1.4.4.2	A2YEZ0_ORYSI	OsI_23687
125527457	1.4.4.2	A2WUC5_ORYSI	OsI_03474
218191460	2.7.6.1	B8AHL6_ORYSI	OsI_08681
218189973	2.7.6.1	B8AGZ8_ORYSI	OsI_05689
125556072	2.7.6.1	A2YF17_ORYSI	OsI_23708
125542023	2.7.6.1	A2XBF2_ORYSI	OsI_09602
125527554	2.7.6.1	A2WUM2_ORYSI	OsI_03574
125556307	1.1.1.271	A2YFQ2_ORYSI	OsI_23938
125556305	1.1.1.271	A2YFQ0_ORYSI	OsI_23937
218195178	1.1.1.42	B8ARN5_ORYSI	OsI_16579
218187884	1.1.1.42	B8ABR1_ORYSI	OsI_01162
125553404	1.1.1.42	A2Y7Q3_ORYSI	OsI_21072
125527107	1.1.1.42	A2WTC5_ORYSI	OsI_03110
116310770	1.1.1.42	Q01I76_ORYSA	OSIGBa0101P20.6
218198744	3.2.1.20	B8B1F4_ORYSI	OsI_24144
218198742	3.2.1.20	B8B1F2_ORYSI	OsI_24141
125556464	3.2.1.20	A2YG59_ORYSI	OsI_24149
218198825	1.14.15.7	B8B239_ORYSI	OsI_24336
218193649	4.1.3.27	B8AQP1_ORYSI	OsI_13300
218192487	4.1.3.27	B8AKD7_ORYSI	OsI_10855
125548612	4.1.3.27	A2XUC4_ORYSI	OsI_16204
125546274	4.1.3.27	ASA1_ORYSI	ASA1 OsI_14147
90265199	4.1.3.27	Q25A90_ORYSA	B0812A04.8
125556678	4.2.1.24	A2YGS3_ORYSI	OsI_24384
262345583,262345581,262345579,262345577,262345575,262345573,262345571,262345569	2.4.1.18	D0TZL2_ORYSI	SBE4
262345553,262345551,262345547	2.4.1.18	D0TZK1_ORYSI	SBE3
262345527,262345525,262345523,262345521,262345519,262345517,262345515,262345513	2.4.1.18	D0TZI4_ORYSI	SBE1
218198910	2.4.1.18	B8B2L2_ORYSI	OsI_24520
218194810	2.4.1.18	B8ATS0_ORYSI	OsI_15790
262345555,262345549,262345545,262345543,262345541,125539715	2.4.1.18	A2X5K0_ORYSI	SBE3 OsI_07480
116309426	2.4.1.18	Q9SXI9_ORYSA	RBE4 H0321H01.10
42521626	2.5.1.32	Q6ED64_ORYSI
218202607	2.5.1.32	B8BED1_ORYSI	OsI_32341
125537487	2.5.1.32	A2ZMZ1_ORYSI	OsI_39199
125556830,264665560,264665558	2.5.1.32	A2YH75_ORYSI	PSY1 OsI_24538
85720671	2.5.1.32	B0KYU9_ORYSI	PSY3
125531169	5.2.1.8	A2Z550_ORYSI	OsI_32776
149391313	5.2.1.8	A6N0A4_ORYSI
149390653	5.2.1.8	A6MZC4_ORYSI
94420699	5.2.1.8	Q1KL26_ORYSI
218202534	5.2.1.8	B8BDX4_ORYSI	OsI_32189
218201860	5.2.1.8	B8BE01_ORYSI	OsI_30760
218201641	5.2.1.8	B8BCS8_ORYSI	OsI_30352
218201484	5.2.1.8	B8B8V4_ORYSI	OsI_29964
218201081	5.2.1.8	B8BAB3_ORYSI	OsI_29072
218199633	5.2.1.8	B8B677_ORYSI	OsI_26047
218199589	5.2.1.8	B8B5Z8_ORYSI	OsI_25973
218199221	5.2.1.8	B8B7Y1_ORYSI	OsI_25185
218199183	5.2.1.8	B8B7Q2_ORYSI	OsI_25113
218198725	5.2.1.8	B8B172_ORYSI	OsI_24063
218198724	5.2.1.8	B8B171_ORYSI	OsI_24062
218197804	5.2.1.8	B8B3Z9_ORYSI	OsI_22166
218195767	5.2.1.8	B8AVY9_ORYSI	OsI_17801
218194934	5.2.1.8	B8AUD1_ORYSI	OsI_16064
218194645	5.2.1.8	B8ASJ6_ORYSI	OsI_15470
218193968	5.2.1.8	B8AM85_ORYSI	OsI_14027
218192902	5.2.1.8	B8AQ71_ORYSI	OsI_11710
218192274	5.2.1.8	B8AQ52_ORYSI	OsI_10414
218191617	5.2.1.8	B8AIU6_ORYSI	OsI_09026
218191591	5.2.1.8	B8AIS0_ORYSI	OsI_08960
218190774	5.2.1.8	B8AI01_ORYSI	OsI_07270
218190280	5.2.1.8	B8ADU8_ORYSI	OsI_06299
218190261	5.2.1.8	B8ADS9_ORYSI	OsI_06261
218190144	5.2.1.8	B8AII0_ORYSI	OsI_06011
218189924	5.2.1.8	B8AGI3_ORYSI	OsI_05592
218189360	5.2.1.8	B8AC26_ORYSI	OsI_04405
218188476	5.2.1.8	B8AAA3_ORYSI	OsI_02450
218188475	5.2.1.8	B8AAA2_ORYSI	OsI_02448
218188004	5.2.1.8	B8ACM2_ORYSI	OsI_01440
218186430	5.2.1.8	B8BM15_ORYSI	OsI_37454
218186014	5.2.1.8	B8BLA5_ORYSI	OsI_36647
218185246	5.2.1.8	B8BIF6_ORYSI	OsI_35103
125564779	5.2.1.8	A2Z498_ORYSI	OsI_32475
125564261	5.2.1.8	A2Z2T0_ORYSI	OsI_31925
125562703	5.2.1.8	A2YYC2_ORYSI	OsI_30350
125562555	5.2.1.8	A2YY42_ORYSI	OsI_30265
125562384	5.2.1.8	A2YXM1_ORYSI	OsI_30091
125559665	5.2.1.8	A2YQ40_ORYSI	OsI_27400
125557143	5.2.1.8	A2YHW8_ORYSI	OsI_24792
125556707	5.2.1.8	A2YGV2_ORYSI	OsI_24414
125556706	5.2.1.8	A2YGV1_ORYSI	OsI_24413
125554575	5.2.1.8	A2YAS0_ORYSI	OsI_22186
149392647,125553912	5.2.1.8	A2Y8V7_ORYSI	OsI_21487
125550497	5.2.1.8	A2XZE6_ORYSI	OsI_18093
125545446	5.2.1.8	A2XL75_ORYSI	OsI_13220
125541213	5.2.1.8	A2X9U8_ORYSI	OsI_09019
149392587,149391937,94420697,125537860	5.2.1.8	Q1KL27_ORYSI	OsI_05635
125528839	5.2.1.8	A2WYA7_ORYSI	OsI_04911
125526567	5.2.1.8	A2WRT5_ORYSI	OsI_02575
125526188	5.2.1.8	A2WQQ6_ORYSI	OsI_02191
125524131	5.2.1.8	A2WJU9_ORYSI	OsI_00098
116310238	5.2.1.8	Q01J28_ORYSA	OSIGBa0140O07.15
116317920,116308872	5.2.1.8	Q01MK7_ORYSA	H0613H07.6 H0716A07.1
218196920,76057837	5.2.1.8	Q3MST6_ORYSI	ppiase OsI_20211
300626183,259431432,30172151	5.2.1.8	Q84LW7_ORYSI	ppiase
125550509	6.3.5.3	A2XZF8_ORYSI	OsI_18107
125528653	6.3.5.3	A2WXS1_ORYSI	OsI_04723
218195928	2.1.1.12	B8AWY8_ORYSI	OsI_18110
125527151	4.1.3.36	A2WTG9_ORYSI	OsI_03152
218200314	3.1.4.11	B8B6B4_ORYSI	OsI_27447
218196017	3.1.4.11	B8AXK3_ORYSI	OsI_18294
218192591	3.1.4.11	B8ALK9_ORYSI	OsI_11098
125537031	3.1.4.11	A2ZLN5_ORYSI	OsI_38731
12698878	3.1.4.11	Q9AXF1_ORYSA
218196143	1.8.1.4	B8AYE1_ORYSI	OsI_18555
218196132	1.8.1.4	B8AYG2_ORYSI	OsI_18533
125525752	1.8.1.4	A2WPH0_ORYSI	OsI_01744
125525704	1.8.1.4	A2WPC2_ORYSI	OsI_01694
125552976	1.14.11.13	A2Y6H5_ORYSI	OsI_20614
125527760	1.14.11.13	A2WV78_ORYSI	OsI_03793
218198430	1.1.5.3	B8B421_ORYSI	OsI_23475
116309146	1.1.5.3	Q01LW8_ORYSA	OSIGBa0101A01.3
38261493	1.1.1.40	Q6SZS7_ORYSI
218188979	1.1.1.40	B8A8R6_ORYSI	OsI_03572
125551105	1.1.1.40	A2Y154_ORYSI	OsI_18741
125527668	1.1.1.40	A2WUY6_ORYSI	OsI_03698
125524727	1.1.1.40	A2WLJ5_ORYSI	OsI_00711
129562652	2.5.1.62	A4GUA1_ORYSI
218196592	2.5.1.62	B8AX06_ORYSI	OsI_19554
218188871	2.1.2.9	B8A7N8_ORYSI	OsI_03318
218196763	5.3.1.16	B8AY22_ORYSI	OsI_19895
218196777	2.7.9.1	B8AYC1_ORYSI	OsI_19920
125544423	2.7.9.1	A2XIA2_ORYSI	OsI_12162
3550549	2.7.9.1	O82032_ORYSI	PPDK
218191209	4.3.1.24	B8AFQ7_ORYSI	OsI_08144
125552417	4.3.1.24	A2Y4W6_ORYSI	OsI_20044
125549041	4.3.1.24	A2XVK3_ORYSI	OsI_16660
125549039	4.3.1.24	A2XVK1_ORYSI	OsI_16658
125540370	4.3.1.24	A2X7F5_ORYSI	OsI_08145
116310306,116310222	4.3.1.24	Q01J43_ORYSA	OSIGBa0145M07.14 OSIGBa0102I15.3
116310219	4.3.1.24	Q01J46_ORYSA	OSIGBa0145M07.11
125540372,871494,158512872	4.3.1.24	PAL2_ORYSI	ZB8 OsI_008000
218196843	2.1.2.1	B8AYI4_ORYSI	OsI_20056
218193723	2.1.2.1	B8AJX7_ORYSI	OsI_13440
125555254	2.1.2.1	A2YCP9_ORYSI	OsI_22888
125534271	2.1.2.1	A2ZDY5_ORYSI	OsI_35999
125528561	2.1.2.1	A2WXH9_ORYSI	OsI_04630
125552442	2.4.2.14	A2Y4Z1_ORYSI	OsI_20066
125528549	2.4.2.14	A2WXG7_ORYSI	OsI_04619
218197215	2.1.1.103	B8AWA2_ORYSI	OsI_20868
218196884	2.3.2.8	B8AYR5_ORYSI	OsI_20147
218196908	2.4.2.9	B8AYT9_ORYSI	OsI_20192
218200308	4.1.1.1	B8B6A8_ORYSI	OsI_27437
218192604	4.1.1.1	B8AM29_ORYSI	OsI_11123
125552671,296523808	4.1.1.1	A2Y5M0_ORYSI	OsI_20291
125524520,296523806	4.1.1.1	A2WKY8_ORYSI	OsI_00500
476284,158513659	4.1.1.1	PDC3_ORYSI	PDC3 OsI_026469
1777455,1009710,158513193	4.1.1.1	PDC2_ORYSI	PDC2 OsI_010826
125552670,1098559,476286,296524286,158512930	4.1.1.1	PDC1_ORYSI	PDC1 OsI_019612
218201310	5.4.2.1	B8BBV1_ORYSI	OsI_29592
218196991	5.4.2.1	B8AZB8_ORYSI	OsI_20375
218191592	5.4.2.1	B8AIS1_ORYSI	OsI_08962
218189276	5.4.2.1	B8ABA7_ORYSI	OsI_04213
218186396	5.4.2.1	B8BLY1_ORYSI	OsI_37392
218185204	5.4.2.1	B8BIZ9_ORYSI	OsI_35025
125543725	5.4.2.1	A2XGA4_ORYSI	OsI_11413
125536893	5.4.2.1	A2ZL97_ORYSI	OsI_38597
125535704	5.4.2.1	A2ZHV8_ORYSI	OsI_37393
125533318	5.4.2.1	A2ZB82_ORYSI	OsI_35027
125526360	5.4.2.1	A2WR78_ORYSI	OsI_02365
218197008	1.6.2.2	B8AZH2_ORYSI	OsI_20413
218187601	1.6.2.2	B8ADI1_ORYSI	OsI_00602
125528147	1.6.2.2	A2WWB5_ORYSI	OsI_04196
218202112	2.4.1.15	B8BF84_ORYSI	OsI_31278
218202062	2.4.1.15	B8BF02_ORYSI	OsI_31155
218201150	2.4.1.15	B8BAS6_ORYSI	TPS7 OsI_29236
218197106	2.4.1.15	B8AZZ8_ORYSI	TPS6 OsI_20637
218192365	2.4.1.15	B8AJN7_ORYSI	TPS4 OsI_10580
218189050	2.4.1.15	B8A9F5_ORYSI	OsI_03737
218188998	2.4.1.15	B8A908_ORYSI	OsI_03616
125563790	2.4.1.15	A2Z1F9_ORYSI	OsI_31442
125561713	2.4.1.15	A2YVQ0_ORYSI	TPS8 OsI_29408
125553006	2.4.1.15	A2Y6K5_ORYSI	OsI_20647
125541419	2.4.1.15	A2XAF4_ORYSI	OsI_09233
125553100	2.3.1.30	A2Y6U9_ORYSI	OsI_20754
125542762	2.3.1.30	A2XDJ1_ORYSI	OsI_10380
125542680	2.3.1.30	A2XDA9_ORYSI	OsI_10292
125542277	2.3.1.30	A2XC56_ORYSI	OsI_09878
125538524	2.3.1.30	A2X259_ORYSI	OsI_06287
125527529	2.3.1.30	A2WUJ7_ORYSI	OsI_03548
218197218	4.2.3.1	B8AWH3_ORYSI	OsI_20875
218188892	4.2.3.1	B8A807_ORYSI	OsI_03360
149391385	1.1.1.86	A6N0E0_ORYSI
218197310	1.1.1.86	B8AWV4_ORYSI	OsI_21076
125527088	1.1.1.86	A2WTA6_ORYSI	OsI_03093
218190720	1.1.1.193	B8AHK1_ORYSI	OsI_07177
218194431	3.5.4.26	B8AR56_ORYSI	OsI_15040
218191968	3.5.4.26	B8ALV7_ORYSI	OsI_09744
218197066	2.3.1.129	B8AZS1_ORYSI	OsI_20542
218194708	1.1.1.100	B8AT02_ORYSI	OsI_15572
218190807	1.1.1.100	B8AIB8_ORYSI	OsI_07326
218186643	1.1.1.100	B8BP22_ORYSI	OsI_37933
99079643	2.2.1.6	A5X301_ORYSI	ALS
99079639	2.2.1.6	A5X2Z9_ORYSI	ALS
99079637	2.2.1.6	A5X2Z8_ORYSI	ALS
218191142	2.2.1.6	B8AFH3_ORYSI	OsI_08011
218185538	2.2.1.6	B8BJX9_ORYSI	OsI_35716
125548071	2.2.1.6	A2XST3_ORYSI	OsI_15666
125548066	2.2.1.6	A2XSS8_ORYSI	OsI_15664
116309349	2.2.1.6	Q01LD9_ORYSA	OSIGBa0096P03.6
313662299	2.2.1.6	E5FWX8_ORYSI	ALS
313662297	2.2.1.6	E5FWX7_ORYSI	ALS
313662295	2.2.1.6	E5FWX6_ORYSI	ALS
313662293	2.2.1.6	E5FWX5_ORYSI	ALS
189031231,189031229	2.2.1.6	B3U3M8_ORYSI	ALS
99079641,189031227,189031225	2.2.1.6	A5X300_ORYSI	ALS
99079645	2.2.1.6	A5X302_ORYSI	ALS
125548497	1.14.13.90	A2XU09_ORYSI	OsI_16086
116310192,116310069	1.14.13.90	Q01J71_ORYSA	OSIGBa0152K17.16 H0818E04.7
218191904	4.1.1.65	B8AL07_ORYSI	OsI_09619
218189776	4.1.1.65	B8A9J6_ORYSI	PSD2 OsI_05287
125548789	2.3.3.9	A2XUV1_ORYSI	OsI_16388
90265259	2.3.3.9	J3JRU9_ORYSA	H0302E05.7
218187013	2.5.1.9	B8BMC0_ORYSI	OsI_38616
125548888	2.5.1.9	A2XV50_ORYSI	OsI_16488
116310717,116310699	2.5.1.9	Q01IC6_ORYSA	OSIGBa0092E01.9 H0306B06.13
218201755	3.2.1.26	B8BDE8_ORYSI	OsI_30564
218195769	3.2.1.26	B8AVZ1_ORYSI	OsI_17809
218195280	3.2.1.26	B8ASN8_ORYSI	OsI_16783
218194820	3.2.1.26	B8ATN8_ORYSI	OsI_15821
218189806	3.2.1.26	B8A9V0_ORYSI	OsI_05346
125537717	3.2.1.26	A2WZV2_ORYSI	OsI_05495
116310466,116310092	3.2.1.26	Q01IH0_ORYSA	OSIGBa0159I10.15 H0502G05.3
293651178	3.2.1.26	D5L5X1_ORYSI	gif1
293651176	3.2.1.26	D5L5X0_ORYSI	gif1
293651162	3.2.1.26	D5L5W3_ORYSI	gif1
293651160	3.2.1.26	D5L5W2_ORYSI	gif1
293651148	3.2.1.26	D5L5V6_ORYSI	gif1
293651138	3.2.1.26	D5L5V1_ORYSI	gif1
293651276	3.2.1.26	D5L620_ORYSI	cin1
293651262	3.2.1.26	D5L613_ORYSI	cin1
293651260	3.2.1.26	D5L612_ORYSI	cin1
293651248	3.2.1.26	D5L606_ORYSI	cin1
218194819,29124959	3.2.1.26	B8ATN7_ORYSI	OsI_15820
33694264,158563896	3.2.1.26	INV3_ORYSI	CIN3 INV4 OsI_015274 OSIGBa0134P10.8
33694260,158563895	3.2.1.26	INV2_ORYSI	CIN2 OsI_015276 OSIGBa0134P10.9
5052007,158513653	3.2.1.26	INV7_ORYSI	CIN7 INV1 OsI_029544
33694262,158513202	3.2.1.26	INV1_ORYSI	CIN1 OsI_007390
125557276	1.13.11.51	A2YIA1_ORYSI	OsI_24937
125545054	1.13.11.51	A2XK33_ORYSI	OsI_12802
125537423	1.13.11.51	A2ZMS7_ORYSI	OsI_39134
218201346	3.6.3.4	B8BBV4_ORYSI	OsI_29667
218198708	3.6.3.4	B8B185_ORYSI	OsI_24030
218190249	3.6.3.4	B8ADR7_ORYSI	OsI_06234
218190158	3.6.3.4	B8AIJ3_ORYSI	OsI_06035
125549298	3.6.3.4	A2XWB0_ORYSI	OsI_16937
218189064	2.4.1.182	B8A9H4_ORYSI	OsI_03760
125546319	2.7.1.6	A2XNP8_ORYSI	OsI_14192
218195552	4.2.3.19	B8AU43_ORYSI	OsI_17356
125549688	4.2.3.19	A2XXF0_ORYSI	OsI_17355
218190252	2.3.1.41	B8ADS0_ORYSI	OsI_06237
125559172	2.3.1.41	A2YNP7_ORYSI	OsI_26869
125548464	2.3.1.41	A2XTX6_ORYSI	OsI_16057
116310231	2.3.1.41	Q01J35_ORYSA	OSIGBa0140O07.8
90399352,90399127	2.7.1.30	Q25A09_ORYSA	H0821G03.7 H0811D08.16
125550102	3.5.4.16	A2XYL4_ORYSI	OsI_17791
125550166	2.7.1.100	A2XYS8_ORYSI	OsI_17859
125550165	2.7.1.100	A2XYS7_ORYSI	OsI_17858
90399160	2.7.1.100	Q259N8_ORYSA	H0818H01.11
90399159	2.7.1.100	Q259N9_ORYSA	H0818H01.10
218184310	2.7.7.41	B8BG85_ORYSI	OsI_33080
218189085	2.7.7.41	B8A9S4_ORYSI	OsI_03804
218195845	5.4.2.8	B8ARV5_ORYSI	OsI_17966
90399073,122195780	5.4.2.8	PMM_ORYSI	PMM H0124B04.12 OsI_017323
125542117	2.7.1.21	A2XBP6_ORYSI	OsI_09708
125542309	2.1.1.143	A2XC88_ORYSI	OsI_09914
218193583	6.3.4.4	B8AQ03_ORYSI	PURA OsI_13153
125542606,308154377	6.3.4.4	PURA_ORYSI	PURA OsI_10220
125531969	2.1.1.10	A2Z7F0_ORYSI	OsI_33628
218192354	2.1.1.10	B8AQV5_ORYSI	OsI_10560
218189133	2.1.1.10	B8AA61_ORYSI	OsI_03916
125537333	2.1.1.10	A2ZMI7_ORYSI	OsI_39039
218192221	4.2.1.75	B8APQ2_ORYSI	OsI_10298
125531652	5.5.1.4	A2Z6I3_ORYSI	OsI_33266
125542734	5.5.1.4	A2XDG3_ORYSI	OsI_10350
165940477	3.1.3.11	B0LSR2_ORYSI
218198703	3.1.3.11	B8B117_ORYSI	OsI_24019
218196867	3.1.3.11	B8AYU2_ORYSI	OsI_20105
125543244,125543243	3.1.3.11	A2XEX2_ORYSI	OsI_10887 OsI_10888
218189431,152032435	3.1.3.11	F16P2_ORYSI	OsI_04558
218192569	2.7.8.5	B8ALI7_ORYSI	OsI_11056
218192626	2.3.1.39	B8AM13_ORYSI	OsI_11164
218192623	2.3.1.39	B8AM10_ORYSI	OsI_11159
125543610	4.3.2.2	A2XFY9_ORYSI	OsI_11289
218193034	1.1.1.49	B8AJR1_ORYSI	OsI_12025
218192705	1.1.1.49	B8AN00_ORYSI	OsI_11322
218191112	1.1.1.49	B8AF07_ORYSI	OsI_07937
125558036	1.1.1.49	A2YKG1_ORYSI	OsI_25709
90265122	1.1.1.49	I7HIN7_ORYSA	H0811E11.5
218192786	4.2.1.2	B8AP09_ORYSI	OsI_11478
125531824	2.5.1.48	A2Z705_ORYSI	OsI_33476
125531822	2.5.1.48	A2Z703_ORYSI	OsI_33474
125531821	2.5.1.48	A2Z702_ORYSI	OsI_33473
218197877	2.5.1.48	B8B4G5_ORYSI	OsI_22339
218192925	2.5.1.48	B8AQ99_ORYSI	OsI_11784
125545103	1.1.1.85	A2XK82_ORYSI	OsI_12854
218200183	2.7.1.68	B8B5I8_ORYSI	OsI_27184
218193606	2.7.1.68	B8AQB0_ORYSI	OsI_13203
218193591	2.7.1.68	B8AQD4_ORYSI	OsI_13176
218192854	2.7.1.68	B8APT7_ORYSI	OsI_11616
218192810	2.7.1.68	B8APE4_ORYSI	OsI_11530
218192475	2.7.1.68	B8AKC1_ORYSI	OsI_10834
218186417	2.7.1.68	B8BM02_ORYSI	OsI_37431
218185238	2.7.1.68	B8BJ30_ORYSI	OsI_35084
125541672	2.7.1.68	A2XB57_ORYSI	OsI_09497
218184299	3.2.1.21	B8BG74_ORYSI	OsI_33062
218202445	3.2.1.21	B8BDH9_ORYSI	OsI_32015
218202444	3.2.1.21	B8BDH8_ORYSI	OsI_32014
218202366	3.2.1.21	B8BCW5_ORYSI	OsI_31851
218201426	3.2.1.21	B8BCB1_ORYSI	OsI_29822
218201425	3.2.1.21	B8BCB0_ORYSI	OsI_29821
218198074	3.2.1.21	B8B155_ORYSI	OsI_22753
218196718	3.2.1.21	B8AXU3_ORYSI	OsI_19808
218196653	3.2.1.21	B8AXF3_ORYSI	OsI_19672
218196652	3.2.1.21	B8AXF2_ORYSI	OsI_19671
218195207	3.2.1.21	B8ARR8_ORYSI	OsI_16626
218195204	3.2.1.21	B8ARR5_ORYSI	OsI_16623
218195040	3.2.1.21	B8AVF1_ORYSI	OsI_16289
218195037	3.2.1.21	B8AVE8_ORYSI	OsI_16285
218193754	3.2.1.21	B8AJW3_ORYSI	OsI_13516
218193596	3.2.1.21	B8AQA0_ORYSI	OsI_13187
218192323	3.2.1.21	B8AQS4_ORYSI	OsI_10506
218189666	3.2.1.21	B8A8R8_ORYSI	OsI_05051
218189530	3.2.1.21	B8A7Q2_ORYSI	OsI_04787
218189265	3.2.1.21	B8AB96_ORYSI	OsI_04187
218186737	3.2.1.21	B8BPB6_ORYSI	OsI_38122
125564193	3.2.1.21	A2Z2L2_ORYSI	OsI_31852
125559446	3.2.1.21	A2YPH1_ORYSI	OsI_27163
125552182	3.2.1.21	A2Y481_ORYSI	OsI_19809
125548692	3.2.1.21	A2XUK4_ORYSI	OsI_16286
125539716	3.2.1.21	A2X5K1_ORYSI	OsI_07481
125526130	3.2.1.21	A2WQJ8_ORYSI	OsI_02124
116310833	3.2.1.21	Q01I20_ORYSA	OSIGBa0140J09.1
116310287	3.2.1.21	Q01IX2_ORYSA	OSIGBa0106G07.1
218195039,116309770	3.2.1.21	BGL12_ORYSI	BGLU12 OsI_16288 OSIGBa0135C13.7
116309769	3.2.1.21	Q01KB3_ORYSA	OSIGBa0135C13.6
116309768	3.2.1.21	Q01KB4_ORYSA	OSIGBa0135C13.5
116309765	3.2.1.21	Q01KA9_ORYSA	OSIGBa0135C13.2
194267709	3.2.1.21	B5ABY0_ORYSI
218185442	2.7.1.67	B8BJN3_ORYSI	OsI_35496
221327779	2.7.1.67	B9V0M5_ORYSI	OSI9Ba083O10_092B13-9
218193698	1.17.1.2	B8AR23_ORYSI	OsI_13396
125545617	1.17.1.2	A2XLP6_ORYSI	OsI_13397
149392699	2.4.1.1	A6N1N2_ORYSI
218193783	2.4.1.1	B8AK73_ORYSI	OsI_13605
218189392	2.4.1.1	B8ACF5_ORYSI	OsI_04460
218193794	1.2.1.11	B8AK88_ORYSI	OsI_13624
125545840	4.2.1.92	A2XMB9_ORYSI	OsI_13668
125542964	4.2.1.92	A2XE43_ORYSI	OsI_10591
125538638	4.2.1.92	A2X2H3_ORYSI	OsI_06390
125538637	4.2.1.92	A2X2H2_ORYSI	OsI_06389
218193848	1.1.1.205	B8AKW1_ORYSI	OsI_13758
218193844	1.1.1.205	B8AKM3_ORYSI	OsI_13742
125546221,158512880	5.5.1.6	CFI_ORYSI	CHI CFI OsI_013593
218194031	6.3.3.1	B8AMR2_ORYSI	OsI_14182
218194863	2.4.2.11	B8AU33_ORYSI	OsI_15928
218194057	2.4.2.11	B8AN97_ORYSI	OsI_14231
116309325,116309305	2.4.2.11	Q01LG0_ORYSA	OSIGBa0093L02.7 B0222C05.1
218189957	2.7.8.11	B8AGY2_ORYSI	OsI_05656
218189963	4.2.1.33	B8AGY8_ORYSI	OsI_05669
125540544	4.2.1.33	A2X7X9_ORYSI	OsI_08324
218184349	1.10.3.2	B8BGC4_ORYSI	OsI_33164
218202030	1.10.3.2	B8BEW5_ORYSI	OsI_31082
218196325	1.10.3.2	B8AZE5_ORYSI	OsI_18967
218196322	1.10.3.2	B8AZE2_ORYSI	OsI_18964
218192627	1.10.3.2	B8AM14_ORYSI	OsI_11166
218192526	1.10.3.2	B8AKR2_ORYSI	OsI_10938
218191585	1.10.3.2	B8AIR4_ORYSI	OsI_08946
218189385	1.10.3.2	B8ACE8_ORYSI	OsI_04450
218189384	1.10.3.2	B8ACE7_ORYSI	OsI_04449
218189358	1.10.3.2	B8AC24_ORYSI	OsI_04403
218189353	1.10.3.2	B8AC19_ORYSI	OsI_04394
218189350	1.10.3.2	B8AC16_ORYSI	OsI_04389
218189305	1.10.3.2	B8ABM4_ORYSI	OsI_04280
218188244	1.10.3.2	B8A896_ORYSI	OsI_01989
218186654	1.10.3.2	B8BP33_ORYSI	OsI_37963
125555774	1.10.3.2	A2YE69_ORYSI	OsI_23413
125552602	1.10.3.2	A2Y5F1_ORYSI	OsI_20219
125554077,150383776	1.10.3.2	LAC20_ORYSI	LAC20 OsI_020915
125542457,150383721	1.10.3.2	LAC18_ORYSI	LAC18 OsI_009829
125554080,150383722	1.10.3.2	LAC19_ORYSI	LAC19 OsI_020918
218190134	6.3.4.15	B8AIK4_ORYSI	OsI_05994
218190140	1.13.11.27	B8AIH6_ORYSI	OsI_06005
218190145	2.5.1.61	B8AII1_ORYSI	OsI_06012
125531360	1.1.1.195	A2Z5P1_ORYSI	OsI_32967
218202121	1.1.1.195	B8BF56_ORYSI	OsI_31294
218202120	1.1.1.195	B8BF55_ORYSI	OsI_31293
218186132	1.1.1.195	B8BLM6_ORYSI	OsI_36879
125563653	1.1.1.195	A2Z122_ORYSI	OsI_31295
125563650	1.1.1.195	A2Z119_ORYSI	OsI_31292
125560859	1.1.1.195	A2YT96_ORYSI	OsI_28541
125549695	1.1.1.195	A2XXF7_ORYSI	OsI_17363
125538397	1.1.1.195	A2X1T2_ORYSI	OsI_06162
77819798,125538395	1.1.1.195	Q38G74_ORYSI	GH2 OsI_06159
218190251	3.7.1.2	B8ADR9_ORYSI	OsI_06236
218196389	4.2.1.119	B8AZU6_ORYSI	OsI_19089
218190488	5.5.1.13	B8AFL6_ORYSI	OsI_06748
125539970,47112765,75103309	5.5.1.13	CPS2_ORYSI	CPS2 CYC2 OsI_007598
218197836	2.7.1.71	B8B486_ORYSI	OsI_22231
218195681	2.7.1.71	B8AV75_ORYSI	OsI_17614
125541140	2.7.1.71	A2X9M5_ORYSI	OsI_08943
116310881	2.7.1.71	Q01HY3_ORYSA	OSIGBa0138H21-OSIGBa0138E01.13
218191125	1.17.7.1	B8AF20_ORYSI	OsI_07973
218199415	2.4.1.198	B8B502_ORYSI	OsI_25603
125545020	2.4.1.198	A2XJZ9_ORYSI	OsI_12767
218195221	2.7.1.20	B8AS20_ORYSI	OsI_16657
125540364	2.7.1.20	A2X7E9_ORYSI	OsI_08139
116310218	2.7.1.20	Q01J47_ORYSA	OSIGBa0145M07.10
125549258	2.7.2.8	A2XW70_ORYSI	OsI_16896
125540558	2.7.2.8	A2X7Z3_ORYSI	OsI_08341
116310128	2.7.2.8	Q01JC9_ORYSA	OSIGBa0122F23.1
218197851	2.7.1.4	B8B4A1_ORYSI	OsI_22272
218189518	2.7.1.4	B8A7T8_ORYSI	OsI_04762
125559927,158513662	2.7.1.4	SCRK2_ORYSI	FRK2 FKII OsI_026607
158512869	2.7.1.4	SCRK1_ORYSI	FRK1 FKI OsI_004651
146739165	2.7.11.1	A5JS88_ORYSI	SI-RLK2
146739163	2.7.11.1	A5JS87_ORYSI	SI-RLK1
89355889	2.7.11.1	Q206Y6_ORYSI
37726923	2.7.11.1	Q330Q4_ORYSI	ipk
204305898	2.7.11.1	B8QUJ4_ORYSI
204305892	2.7.11.1	B8QUJ1_ORYSI
204305890	2.7.11.1	B8QUJ0_ORYSI
204305886	2.7.11.1	B8QUI8_ORYSI
38679443	2.7.11.1	Q6S7F1_ORYSI	BISERK1
218185026	2.7.11.1	B8BIA0_ORYSI	OsI_34678
218185018	2.7.11.1	B8BI95_ORYSI	OsI_34659
218184972	2.7.11.1	B8BI46_ORYSI	OsI_34560
218184971	2.7.11.1	B8BI45_ORYSI	OsI_34557
218184945	2.7.11.1	B8BI19_ORYSI	OsI_34493
218184934	2.7.11.1	B8BI08_ORYSI	OsI_34461
218184929	2.7.11.1	B8BI03_ORYSI	OsI_34451
218184901	2.7.11.1	B8BHX5_ORYSI	OsI_34360
218184889	2.7.11.1	B8BHW3_ORYSI	OsI_34336
218184820	2.7.11.1	B8BHP5_ORYSI	OsI_34186
218184715	2.7.11.1	B8BHE3_ORYSI	OsI_33975
218184713	2.7.11.1	B8BHE1_ORYSI	OsI_33971
218184712	2.7.11.1	B8BHE0_ORYSI	OsI_33970
218184618	2.7.11.1	B8BH46_ORYSI	OsI_33788
218184616	2.7.11.1	B8BH44_ORYSI	OsI_33785
218184611	2.7.11.1	B8BH39_ORYSI	OsI_33776
218184577	2.7.11.1	B8BH02_ORYSI	OsI_33714
218184573	2.7.11.1	B8BGZ8_ORYSI	OsI_33706
218184444	2.7.11.1	B8BGL9_ORYSI	OsI_33412
218184408	2.7.11.1	B8BGI3_ORYSI	OsI_33296
218184376	2.7.11.1	B8BGF3_ORYSI	OsI_33210
218184315	2.7.11.1	B8BG90_ORYSI	OsI_33096
218184308	2.7.11.1	B8BG83_ORYSI	OsI_33078
218184285	2.7.11.1	B8BG60_ORYSI	OsI_33040
218184272	2.7.11.1	B8BG47_ORYSI	OsI_33019
218184233	2.7.11.1	B8BG08_ORYSI	OsI_32942
218184168	2.7.11.1	B8BFT8_ORYSI	OsI_32811
218184157	2.7.11.1	B8BFS5_ORYSI	OsI_32787
218184097	2.7.11.1	B8BFG6_ORYSI	OsI_32648
218184060	2.7.11.1	B8BFH2_ORYSI	OsI_32581
125532955	2.7.11.1	A2ZA86_ORYSI	OsI_34648
125532762	2.7.11.1	A2Z9P3_ORYSI	OsI_34456
125532747	2.7.11.1	A2Z9M8_ORYSI	OsI_34439
125532719	2.7.11.1	A2Z9K0_ORYSI	OsI_34410
125532638	2.7.11.1	A2Z9B9_ORYSI	OsI_34316
125532611	2.7.11.1	A2Z992_ORYSI	OsI_34285
125532354	2.7.11.1	A2Z8I5_ORYSI	OsI_34020
125532353	2.7.11.1	A2Z8I4_ORYSI	OsI_34019
125532319	2.7.11.1	A2Z8F0_ORYSI	OsI_33987
125532314	2.7.11.1	A2Z8E5_ORYSI	OsI_33982
125532308	2.7.11.1	A2Z8D9_ORYSI	OsI_33976
125532305	2.7.11.1	A2Z8D6_ORYSI	OsI_33973
125532298	2.7.11.1	A2Z8C9_ORYSI	OsI_33968
125532294	2.7.11.1	A2Z8C5_ORYSI	OsI_33964
125532138	2.7.11.1	A2Z7W9_ORYSI	OsI_33804
125532110	2.7.11.1	A2Z7U1_ORYSI	OsI_33777
125532056	2.7.11.1	A2Z7N7_ORYSI	OsI_33721
125531854	2.7.11.1	A2Z735_ORYSI	OsI_33509
125531816	2.7.11.1	A2Z6Z7_ORYSI	OsI_33468
125531793	2.7.11.1	A2Z6X4_ORYSI	OsI_33445
125531685	2.7.11.1	A2Z6L6_ORYSI	OsI_33294
125531535	2.7.11.1	A2Z666_ORYSI	OsI_33144
125531533	2.7.11.1	A2Z664_ORYSI	OsI_33142
125531516	2.7.11.1	A2Z647_ORYSI	OsI_33125
125531505	2.7.11.1	A2Z636_ORYSI	OsI_33114
125531326	2.7.11.1	A2Z5K7_ORYSI	OsI_32932
125531182,125531179	2.7.11.1	A2Z560_ORYSI	OsI_32786 OsI_32789
125531177	2.7.11.1	A2Z558_ORYSI	OsI_32785
125531120	2.7.11.1	A2Z501_ORYSI	OsI_32726
125531077	2.7.11.1	A2Z4V8_ORYSI	OsI_32683
125531076	2.7.11.1	A2Z4V7_ORYSI	OsI_32682
125531043	2.7.11.1	A2Z4S4_ORYSI	OsI_32650
125531042	2.7.11.1	A2Z4S3_ORYSI	OsI_32649
125530974	2.7.11.1	A2Z4K5_ORYSI	OsI_32579
125530946	2.7.11.1	A2Z4H7_ORYSI	OsI_32557
86361431	2.7.11.1	A1XFD8_ORYSI	Pi2_C101A51.15
63098478	2.7.11.1	A0PIA7_ORYSI	Xa21
63098486,63098484,63098482,63098480,63098476,63098474,63098470	2.7.11.1	A0PIA3_ORYSI	Xa21
63098472,63098468	2.7.11.1	A0PIA2_ORYSI	Xa21
62466335,62466327,62466325,62466323,86990862	2.7.11.1	A0PIG2_ORYSI
62466341,62466339,62466337,62466333,62466331,62466329,86990864,86990860	2.7.11.1	A0PIG5_ORYSI
86990758,86990756	2.7.11.1	A0SGU5_ORYSI	Xa21
86990760,86990754	2.7.11.1	A0SGU4_ORYSI	Xa21
149392615	2.7.11.1	A6N1J0_ORYSI
149392145	2.7.11.1	A6N114_ORYSI
149391429	2.7.11.1	A6N0G2_ORYSI
149391305	2.7.11.1	A6N0A0_ORYSI
149390711	2.7.11.1	A6MZF3_ORYSI
146230678	2.7.11.1	A5H9K4_ORYSI
87280662	2.7.11.1	Q2EZ09_ORYSI	TRKc
87280659	2.7.11.1	Q2EZ10_ORYSI	TRKb
87280657	2.7.11.1	Q2EZ12_ORYSI	TRKa
87280655	2.7.11.1	Q2EZ13_ORYSI	MRKc
87280653	2.7.11.1	Q2EZ15_ORYSI	MRKa
51873300,51873290,76364056	2.7.11.1	Q66QA2_ORYSI
51873299,51873288,76364055	2.7.11.1	Q66QA3_ORYSI
51873298,51873286,76364054	2.7.11.1	Q66QA4_ORYSI
51873297,76364053	2.7.11.1	Q66QA5_ORYSI
51873296,51873284,76364052	2.7.11.1	Q66QA6_ORYSI
51873295,51873282,76364051	2.7.11.1	Q66QA7_ORYSI
218202666	2.7.11.1	B8BEV3_ORYSI	OsI_32462
218202621	2.7.11.1	B8BEE5_ORYSI	OsI_32379
218202590	2.7.11.1	B8BEE9_ORYSI	OsI_32308
218202589	2.7.11.1	B8BEE8_ORYSI	OsI_32307
218202586	2.7.11.1	B8BE67_ORYSI	OsI_32304
218202585	2.7.11.1	B8BE66_ORYSI	OsI_32303
218202582	2.7.11.1	B8BE63_ORYSI	OsI_32299
218202581	2.7.11.1	B8BE62_ORYSI	OsI_32298
218202448	2.7.11.1	B8BDI2_ORYSI	OsI_32021
218202440	2.7.11.1	B8BDL3_ORYSI	OsI_32002
218202007	2.7.11.1	B8BES5_ORYSI	OsI_31048
218202004	2.7.11.1	B8BES2_ORYSI	OsI_31037
218202002	2.7.11.1	B8BES0_ORYSI	OsI_31027
218202001	2.7.11.1	B8BER9_ORYSI	OsI_31026
218201996	2.7.11.1	B8BER4_ORYSI	OsI_31016
218201995	2.7.11.1	B8BER3_ORYSI	OsI_31015
218201993	2.7.11.1	B8BER1_ORYSI	OsI_31012
218201991	2.7.11.1	B8BEQ9_ORYSI	OsI_31008
218201990	2.7.11.1	B8BEQ8_ORYSI	OsI_31006
218201987	2.7.11.1	B8BEQ5_ORYSI	OsI_31002
218201976	2.7.11.1	B8BEP4_ORYSI	OsI_30981
218201955	2.7.11.1	B8BEI5_ORYSI	OsI_30937
218201938	2.7.11.1	B8BEG8_ORYSI	OsI_30899
218201913	2.7.11.1	B8BEA2_ORYSI	OsI_30854
218201782	2.7.11.1	B8BDR5_ORYSI	OsI_30614
218201680	2.7.11.1	B8BCZ9_ORYSI	OsI_30427
218201539	2.7.11.1	B8B963_ORYSI	OsI_30082
218201530	2.7.11.1	B8B954_ORYSI	OsI_30063
218201446	2.7.11.1	B8BCD1_ORYSI	OsI_29867
218201405	2.7.11.1	B8BCD4_ORYSI	OsI_29777
218201364	2.7.11.1	B8BC15_ORYSI	OsI_29700
218201334	2.7.11.1	B8BBT7_ORYSI	OsI_29652
218201226	2.7.11.1	B8BB83_ORYSI	OsI_29411
218200992	2.7.11.1	B8B9W4_ORYSI	OsI_28882
218200937	2.7.11.1	B8B9Q5_ORYSI	OsI_28773
218200767	2.7.11.1	B8B8Q8_ORYSI	OsI_28446
218200761	2.7.11.1	B8B8Q2_ORYSI	OsI_28436
218200759	2.7.11.1	B8B8Q0_ORYSI	OsI_28433
218200720	2.7.11.1	B8BC69_ORYSI	OsI_28338
218200715	2.7.11.1	B8BC64_ORYSI	OsI_28328
49473450,218200693	2.7.11.1	Q6DTV6_ORYSI	MAPKKK32 OsI_28279
218200651	2.7.11.1	B8BBQ2_ORYSI	OsI_28201
218200650	2.7.11.1	B8BBQ1_ORYSI	OsI_28200
218200648	2.7.11.1	B8BBP9_ORYSI	OsI_28198
218200647	2.7.11.1	B8BBP8_ORYSI	OsI_28197
218200646	2.7.11.1	B8BBP7_ORYSI	OsI_28196
218200645	2.7.11.1	B8BBP6_ORYSI	OsI_28195
218200644	2.7.11.1	B8BBP5_ORYSI	OsI_28194
218200643	2.7.11.1	B8BBP4_ORYSI	OsI_28191
218200642	2.7.11.1	B8BBP3_ORYSI	OsI_28190
218200640	2.7.11.1	B8BBP1_ORYSI	OsI_28179
218200572	2.7.11.1	B8BBD1_ORYSI	OsI_28039
218200553	2.7.11.1	B8BB68_ORYSI	OsI_28003
218200416	2.7.11.1	B8BAE8_ORYSI	OsI_27656
218200415	2.7.11.1	B8BAE7_ORYSI	OsI_27654
218200334	2.7.11.1	B8B9Y1_ORYSI	OsI_27488
218200319	2.7.11.1	B8B6B9_ORYSI	OsI_27457
218200225	2.7.11.1	B8B5T3_ORYSI	OsI_27262
218200148	2.7.11.1	B8B5B5_ORYSI	OsI_27127
218200147	2.7.11.1	B8B5B4_ORYSI	OsI_27126
218200078	2.7.11.1	B8B4X3_ORYSI	OsI_26985
218200061	2.7.11.1	B8B4V6_ORYSI	OsI_26945
218200043	2.7.11.1	B8B8N4_ORYSI	OsI_26911
218200032	2.7.11.1	B8B8L9_ORYSI	OsI_26896
218200023	2.7.11.1	B8B8L0_ORYSI	OsI_26884
218200007	2.7.11.1	B8B8D9_ORYSI	OsI_26847
218199962	2.7.11.1	B8B834_ORYSI	OsI_26735
218199887	2.7.11.1	B8B7R0_ORYSI	OsI_26590
218199886	2.7.11.1	B8B7Q9_ORYSI	OsI_26589
218199885	2.7.11.1	B8B7Q8_ORYSI	OsI_26588
218199866	2.7.11.1	B8B7I5_ORYSI	OsI_26541
218199850	2.7.11.1	B8B7G9_ORYSI	OsI_26501
218199816	2.7.11.1	B8B784_ORYSI	OsI_26417
218199792	2.7.11.1	B8B714_ORYSI	OsI_26367
218199791	2.7.11.1	B8B713_ORYSI	OsI_26364
218199790	2.7.11.1	B8B712_ORYSI	OsI_26363
218199788	2.7.11.1	B8B710_ORYSI	OsI_26359
218199786	2.7.11.1	B8B708_ORYSI	OsI_26357
218199785	2.7.11.1	B8B707_ORYSI	OsI_26356
218199784	2.7.11.1	B8B706_ORYSI	OsI_26355
218199781	2.7.11.1	B8B703_ORYSI	OsI_26352
218199779	2.7.11.1	B8B701_ORYSI	OsI_26349
218199776	2.7.11.1	B8B6Z8_ORYSI	OsI_26346
218199770	2.7.11.1	B8B6Z2_ORYSI	OsI_26339
218199769	2.7.11.1	B8B6Z1_ORYSI	OsI_26338
218199765	2.7.11.1	B8B6Y7_ORYSI	OsI_26331
218199764	2.7.11.1	B8B6Y6_ORYSI	OsI_26329
218199763	2.7.11.1	B8B6Y5_ORYSI	OsI_26328
218199760	2.7.11.1	B8B6Y2_ORYSI	OsI_26323
218199758	2.7.11.1	B8B6Y0_ORYSI	OsI_26316
218199757	2.7.11.1	B8B6X9_ORYSI	OsI_26314
218199756	2.7.11.1	B8B6X8_ORYSI	OsI_26313
218199688	2.7.11.1	B8B6G3_ORYSI	OsI_26137
218199677	2.7.11.1	B8B6F2_ORYSI	OsI_26120
218199656	2.7.11.1	B8B6D1_ORYSI	OsI_26079
218199626	2.7.11.1	B8B670_ORYSI	OsI_26033
218199587	2.7.11.1	B8B5Z6_ORYSI	OsI_25968
218199579	2.7.11.1	B8B5Y8_ORYSI	OsI_25954
218199516	2.7.11.1	B8B5N5_ORYSI	OsI_25817
218199473	2.7.11.1	B8B5E8_ORYSI	OsI_25726
218199436	2.7.11.1	B8B567_ORYSI	OsI_25644
218199400	2.7.11.1	B8B4Y7_ORYSI	OsI_25577
218199382	2.7.11.1	B8B4S8_ORYSI	OsI_25539
218199251	2.7.11.1	B8B860_ORYSI	OsI_25240
218199210	2.7.11.1	B8B7X0_ORYSI	OsI_25172
218199175	2.7.11.1	B8B7P0_ORYSI	OsI_25094
218199164	2.7.11.1	B8B7M9_ORYSI	OsI_25061
218199095	2.7.11.1	B8B7B8_ORYSI	OsI_24914
218199084	2.7.11.1	B8B7A7_ORYSI	OsI_24881
218199040	2.7.11.1	B8B722_ORYSI	OsI_24784
218199039	2.7.11.1	B8B721_ORYSI	OsI_24781
218199038	2.7.11.1	B8B720_ORYSI	OsI_24777
218199037	2.7.11.1	B8B719_ORYSI	OsI_24775
218199036	2.7.11.1	B8B718_ORYSI	OsI_24774
218199033	2.7.11.1	B8B715_ORYSI	OsI_24765
218199011	2.7.11.1	B8B6U0_ORYSI	OsI_24717
218198962	2.7.11.1	B8B6K3_ORYSI	OsI_24605
218198914	2.7.11.1	B8B2L6_ORYSI	OsI_24527
218198905	2.7.11.1	B8B2K2_ORYSI	OsI_24506
218198904	2.7.11.1	B8B2K1_ORYSI	OsI_24505
218198881	2.7.11.1	B8B2H8_ORYSI	OsI_24450
218198803	2.7.11.1	B8B1V0_ORYSI	OsI_24279
218198801	2.7.11.1	B8B1U8_ORYSI	OsI_24277
218198800	2.7.11.1	B8B1U7_ORYSI	OsI_24276
218198799	2.7.11.1	B8B1U6_ORYSI	OsI_24274
218198788	2.7.11.1	B8B1T5_ORYSI	OsI_24255
218198786	2.7.11.1	B8B1T3_ORYSI	OsI_24251
218198770	2.7.11.1	B8B1V4_ORYSI	OsI_24212
218198746	2.7.11.1	B8B1F6_ORYSI	OsI_24148
218198701	2.7.11.1	B8B115_ORYSI	OsI_24017
218198692	2.7.11.1	B8B102_ORYSI	OsI_23995
218198649	2.7.11.1	B8B0Q9_ORYSI	OsI_23895
218198610	2.7.11.1	B8B0H3_ORYSI	OsI_23822
218198603	2.7.11.1	B8B0G6_ORYSI	OsI_23812
218198561	2.7.11.1	B8B4N2_ORYSI	OsI_23723
218198557	2.7.11.1	B8B4M8_ORYSI	OsI_23718
218198509	2.7.11.1	B8B4D7_ORYSI	OsI_23636
218198467	2.7.11.1	B8B458_ORYSI	OsI_23539
218198462	2.7.11.1	B8B453_ORYSI	OsI_23530
218198452	2.7.11.1	B8B443_ORYSI	OsI_23515
218198451	2.7.11.1	B8B442_ORYSI	OsI_23514
218198449	2.7.11.1	B8B440_ORYSI	OsI_23511
218198447	2.7.11.1	B8B438_ORYSI	OsI_23501
218198443	2.7.11.1	B8B434_ORYSI	OsI_23493
218198442	2.7.11.1	B8B433_ORYSI	OsI_23491
218198421	2.7.11.1	B8B3W0_ORYSI	OsI_23459
218198354	2.7.11.1	B8B3J1_ORYSI	OsI_23306
218198235	2.7.11.1	B8B2T2_ORYSI	OsI_23067
218198224	2.7.11.1	B8B2S1_ORYSI	OsI_23045
218198215	2.7.11.1	B8B2G1_ORYSI	OsI_23028
218198214	2.7.11.1	B8B2G0_ORYSI	OsI_23027
218198207	2.7.11.1	B8B2F0_ORYSI	OsI_23014
218198202	2.7.11.1	B8B2E5_ORYSI	OsI_23005
218198177	2.7.11.1	B8B220_ORYSI	OsI_22958
218198115	2.7.11.1	B8B1E3_ORYSI	OsI_22840
218198103	2.7.11.1	B8B1C7_ORYSI	OsI_22812
218198089	2.7.11.1	B8B1B3_ORYSI	OsI_22785
218197999	2.7.11.1	B8B0T7_ORYSI	OsI_22605
218197988	2.7.11.1	B8B0N5_ORYSI	OsI_22584
218197976	2.7.11.1	B8B0L9_ORYSI	OsI_22555
218197957	2.7.11.1	B8B0K0_ORYSI	OsI_22508
218197948	2.7.11.1	B8B0J1_ORYSI	OsI_22490
218197909	2.7.11.1	B8B0A3_ORYSI	OsI_22399
218197833	2.7.11.1	B8B483_ORYSI	OsI_22227
218197770	2.7.11.1	B8B3W5_ORYSI	OsI_22078
218197719	2.7.11.1	B8B3Q9_ORYSI	OsI_21950
218197704	2.7.11.1	B8B3H4_ORYSI	OsI_21914
218197667	2.7.11.1	B8B3A0_ORYSI	OsI_21831
218197657	2.7.11.1	B8B387_ORYSI	OsI_21819
218197654	2.7.11.1	B8B384_ORYSI	OsI_21805
218197646	2.7.11.1	B8B376_ORYSI	OsI_21792
218197640	2.7.11.1	B8B370_ORYSI	OsI_21783
218197534	2.7.11.1	B8B2B7_ORYSI	OsI_21572
218197531	2.7.11.1	B8B2B4_ORYSI	OsI_21568
218197494	2.7.11.1	B8B1Z7_ORYSI	OsI_21484
218197482	2.7.11.1	B8B1Y1_ORYSI	OsI_21455
218197377	2.7.11.1	B8AXH9_ORYSI	OsI_21242
218197369	2.7.11.1	B8AXH1_ORYSI	OsI_21224
218197358	2.7.11.1	B8AX94_ORYSI	OsI_21201
218197352	2.7.11.1	B8AX83_ORYSI	OsI_21190
218197351	2.7.11.1	B8AX82_ORYSI	OsI_21189
218197344	2.7.11.1	B8AX75_ORYSI	OsI_21169
218197223	2.7.11.1	B8AWE6_ORYSI	OsI_20886
218197209	2.7.11.1	B8AW96_ORYSI	OsI_20853
218197147	2.7.11.1	B8B075_ORYSI	OsI_20733
218197132	2.7.11.1	B8B091_ORYSI	OsI_20687
218197130	2.7.11.1	B8B089_ORYSI	OsI_20684
218197129	2.7.11.1	B8B088_ORYSI	OsI_20681
218197085	2.7.11.1	B8B015_ORYSI	OsI_20589
218197052	2.7.11.1	B8AZQ7_ORYSI	OsI_20511
218197024	2.7.11.1	B8AZI8_ORYSI	OsI_20442
218197021	2.7.11.1	B8AZI5_ORYSI	OsI_20437
218196998	2.7.11.1	B8AZK3_ORYSI	OsI_20397
218196996	2.7.11.1	B8AZC7_ORYSI	OsI_20395
218196983	2.7.11.1	B8AZB0_ORYSI	OsI_20362
218196973	2.7.11.1	B8AZA0_ORYSI	OsI_20330
218196958	2.7.11.1	B8AZ37_ORYSI	OsI_20299
218196947	2.7.11.1	B8AZ21_ORYSI	OsI_20273
218196870	2.7.11.1	B8AYQ1_ORYSI	OsI_20119
218196862	2.7.11.1	B8AYK6_ORYSI	OsI_20093
218196808	2.7.11.1	B8AYA8_ORYSI	OsI_19978
218196802	2.7.11.1	B8AYA2_ORYSI	OsI_19968
218196756	2.7.11.1	B8AY16_ORYSI	OsI_19878
218196663	2.7.11.1	B8AXG7_ORYSI	OsI_19711
218196573	2.7.11.1	B8AWP3_ORYSI	OsI_19502
218196548	2.7.11.1	B8AWL4_ORYSI	OsI_19455
218196544	2.7.11.1	B8AWL0_ORYSI	OsI_19445
218196543	2.7.11.1	B8AWK9_ORYSI	OsI_19444
218196519	2.7.11.1	B8AWC7_ORYSI	OsI_19395
218196440	2.7.11.1	B8B041_ORYSI	OsI_19224
218196438	2.7.11.1	B8B039_ORYSI	OsI_19220
218196433	2.7.11.1	B8B034_ORYSI	OsI_19213
218196432	2.7.11.1	B8B033_ORYSI	OsI_19211
218196431	2.7.11.1	B8B032_ORYSI	OsI_19210
218196424	2.7.11.1	B8B025_ORYSI	OsI_19195
218196414	2.7.11.1	B8AZX1_ORYSI	OsI_19151
218196403	2.7.11.1	B8AZW0_ORYSI	OsI_19122
218196383	2.7.11.1	B8AZX2_ORYSI	OsI_19077
218196367	2.7.11.1	B8AZN4_ORYSI	OsI_19047
218196301	2.7.11.1	B8AZ90_ORYSI	OsI_18915
218196270	2.7.11.1	B8AZ54_ORYSI	OsI_18852
218196252	2.7.11.1	B8AYZ4_ORYSI	OsI_18817
218196246	2.7.11.1	B8AYY4_ORYSI	OsI_18806
218196175	2.7.11.1	B8AYL1_ORYSI	OsI_18628
218196161	2.7.11.1	B8AYF9_ORYSI	OsI_18603
218196160	2.7.11.1	B8AYF8_ORYSI	OsI_18597
218196049	2.7.11.1	B8AXN8_ORYSI	OsI_18365
218196047	2.7.11.1	B8AXN6_ORYSI	OsI_18361
218196026	2.7.11.1	B8AXL2_ORYSI	OsI_18315
218196009	2.7.11.1	B8AXJ5_ORYSI	OsI_18275
218196008	2.7.11.1	B8AXJ4_ORYSI	OsI_18274
218195960	2.7.11.1	B8AWZ2_ORYSI	OsI_18165
218195925	2.7.11.1	B8AWY5_ORYSI	OsI_18105
218195908	2.7.11.1	B8AWI6_ORYSI	OsI_18076
218195874	2.7.11.1	B8ARU7_ORYSI	OsI_18023
218195866	2.7.11.1	B8ART9_ORYSI	OsI_18007
218195865	2.7.11.1	B8ART8_ORYSI	OsI_18006
218195853	2.7.11.1	B8ARS6_ORYSI	OsI_17977
218195826	2.7.11.1	B8ARG5_ORYSI	OsI_17923
218195822	2.7.11.1	B8ARG1_ORYSI	OsI_17914
218195749	2.7.11.1	B8AW09_ORYSI	OsI_17770
218195743	2.7.11.1	B8AVN5_ORYSI	OsI_17753
218195736	2.7.11.1	B8AVM0_ORYSI	OsI_17728
218195735	2.7.11.1	B8AVL9_ORYSI	OsI_17727
218195732	2.7.11.1	B8AVL6_ORYSI	OsI_17723
218195731	2.7.11.1	B8AVL5_ORYSI	OsI_17722
218195663	2.7.11.1	B8AUW8_ORYSI	OsI_17570
218195662	2.7.11.1	B8AUW7_ORYSI	OsI_17568
218195661	2.7.11.1	B8AUW6_ORYSI	OsI_17567
218195660	2.7.11.1	B8AUW5_ORYSI	OsI_17566
218195659	2.7.11.1	B8AUW0_ORYSI	OsI_17565
218195657	2.7.11.1	B8AUV8_ORYSI	OsI_17562
218195656	2.7.11.1	B8AUV7_ORYSI	OsI_17559
218195655	2.7.11.1	B8AUV6_ORYSI	OsI_17558
218195654	2.7.11.1	B8AUV5_ORYSI	OsI_17557
218195653	2.7.11.1	B8AUV4_ORYSI	OsI_17556
218195652	2.7.11.1	B8AUV3_ORYSI	OsI_17555
218195651	2.7.11.1	B8AUV2_ORYSI	OsI_17554
218195650	2.7.11.1	B8AUV1_ORYSI	OsI_17553
218195593	2.7.11.1	B8AUG0_ORYSI	OsI_17436
218195582	2.7.11.1	B8AU77_ORYSI	OsI_17412
218195581	2.7.11.1	B8AU76_ORYSI	OsI_17411
218195576	2.7.11.1	B8AU67_ORYSI	OsI_17399
218195438	2.7.11.1	B8ATC8_ORYSI	OsI_17131
218195436	2.7.11.1	B8ATC6_ORYSI	OsI_17127
218195411	2.7.11.1	B8AT63_ORYSI	OsI_17066
218195265	2.7.11.1	B8ASD6_ORYSI	OsI_16755
218195264	2.7.11.1	B8ASD5_ORYSI	OsI_16754
218195186	2.7.11.1	B8ARP3_ORYSI	OsI_16593
218195169	2.7.11.1	B8ARD3_ORYSI	OsI_16560
218195168	2.7.11.1	B8ARD2_ORYSI	OsI_16559
218195160	2.7.11.1	B8ARC0_ORYSI	OsI_16541
218195113	2.7.11.1	B8AVV9_ORYSI	OsI_16439
218195104	2.7.11.1	B8AVV0_ORYSI	OsI_16420
218195044	2.7.11.1	B8AVF5_ORYSI	OsI_16293
218195042	2.7.11.1	B8AVF3_ORYSI	OsI_16291
218194987	2.7.11.1	B8AUS3_ORYSI	OsI_16190
218194965	2.7.11.1	B8AUP7_ORYSI	OsI_16148
218194894	2.7.11.1	B8AU20_ORYSI	OsI_15990
218194866	2.7.11.1	B8ATZ2_ORYSI	OsI_15932
218194838	2.7.11.1	B8ATQ5_ORYSI	OsI_15879
218194837	2.7.11.1	B8ATQ4_ORYSI	OsI_15874
218194835	2.7.11.1	B8ASF5_ORYSI	OsI_15869
218194834	2.7.11.1	B8ATQ2_ORYSI	OsI_15867
218194813	2.7.11.1	B8ATS3_ORYSI	OsI_15794
218194768	2.7.11.1	B8ATA1_ORYSI	OsI_15700
218194765	2.7.11.1	B8AT94_ORYSI	OsI_15695
218194656	2.7.11.1	B8ASQ4_ORYSI	OsI_15487
218194647	2.7.11.1	B8ASJ8_ORYSI	OsI_15472
218194575	2.7.11.1	B8AS81_ORYSI	OsI_15327
218194566	2.7.11.1	B8AS72_ORYSI	OsI_15306
218194564	2.7.11.1	B8AS70_ORYSI	OsI_15300
218194562	2.7.11.1	B8AS68_ORYSI	OsI_15296
218194542	2.7.11.1	B8ARZ7_ORYSI	OsI_15261
218194537	2.7.11.1	B8ARZ2_ORYSI	OsI_15252
218194524	2.7.11.1	B8ARX9_ORYSI	OsI_15232
218194399	2.7.11.1	B8AVQ1_ORYSI	OsI_14969
218194309	2.7.11.1	B8AUZ5_ORYSI	OsI_14783
218194287	2.7.11.1	B8AUX3_ORYSI	OsI_14731
218194282	2.7.11.1	B8AV16_ORYSI	OsI_14717
218194279	2.7.11.1	B8AUN6_ORYSI	OsI_14711
218194274	2.7.11.1	B8AUN1_ORYSI	OsI_14704
218194261	2.7.11.1	B8AUL3_ORYSI	OsI_14685
218194217	2.7.11.1	B8AU95_ORYSI	OsI_14590
218194216	2.7.11.1	B8AU94_ORYSI	OsI_14588
218194215	2.7.11.1	B8AU93_ORYSI	OsI_14587
218194198	2.7.11.1	B8ATY7_ORYSI	OsI_14510
218194182	2.7.11.1	B8AP85_ORYSI	OsI_14473
218194178	2.7.11.1	B8AP81_ORYSI	OsI_14462
218194086	2.7.11.1	B8AN83_ORYSI	OsI_14289
218194027	2.7.11.1	B8AMQ8_ORYSI	OsI_14165
218194002	2.7.11.1	B8AMC3_ORYSI	OsI_14109
218193927	2.7.11.1	B8ALU2_ORYSI	OsI_13937
218193877	2.7.11.1	B8ALC3_ORYSI	OsI_13827
218193807	2.7.11.1	B8AKI2_ORYSI	OsI_13651
218193802	2.7.11.1	B8AKL5_ORYSI	OsI_13642
218193798	2.7.11.1	B8AK92_ORYSI	OsI_13634
218193789	2.7.11.1	B8AK79_ORYSI	OsI_13615
218193776	2.7.11.1	B8AK85_ORYSI	OsI_13553
218193647	2.7.11.1	B8AQN9_ORYSI	OsI_13294
218193630	2.7.11.1	B8AQD9_ORYSI	OsI_13260
218193598	2.7.11.1	B8AQA2_ORYSI	OsI_13190
218193597	2.7.11.1	B8AQA1_ORYSI	OsI_13188
218193545	2.7.11.1	B8AQ06_ORYSI	OsI_13081
218193376	2.7.11.1	B8AN32_ORYSI	OsI_12742
218193213	2.7.11.1	B8AL67_ORYSI	OsI_12386
218193184	2.7.11.1	B8AL38_ORYSI	OsI_12324
218193124	2.7.11.1	B8AKG6_ORYSI	OsI_12200
218193079	2.7.11.1	B8AK50_ORYSI	OsI_12106
218193022	2.7.11.1	B8AJP9_ORYSI	OsI_11987
218192965	2.7.11.1	B8AQM4_ORYSI	OsI_11876
218192796	2.7.11.1	B8APG6_ORYSI	OsI_11492
218192776	2.7.11.1	B8ANZ9_ORYSI	OsI_11455
218192765	2.7.11.1	B8ANY8_ORYSI	OsI_11431
218192762	2.7.11.1	B8ANY5_ORYSI	OsI_11426
218192755	2.7.11.1	B8AP14_ORYSI	OsI_11410
218192718	2.7.11.1	B8ANE1_ORYSI	OsI_11343
218192712	2.7.11.1	B8AN11_ORYSI	OsI_11332
218192512	2.7.11.1	B8AKP4_ORYSI	OsI_10907
218192509	2.7.11.1	B8AKP1_ORYSI	OsI_10899
218192502	2.7.11.1	B8AKN4_ORYSI	OsI_10880
218192486	2.7.11.1	B8AKD6_ORYSI	OsI_10854
218192449	2.7.11.1	B8AK95_ORYSI	OsI_10778
218192380	2.7.11.1	B8AJL6_ORYSI	OsI_10619
218192360	2.7.11.1	B8AQW5_ORYSI	OsI_10572
218192318	2.7.11.1	B8AQV8_ORYSI	OsI_10498
218192301	2.7.11.1	B8AQG5_ORYSI	OsI_10461
218192174	2.7.11.1	B8APB2_ORYSI	OsI_10191
218192130	2.7.11.1	B8ANV0_ORYSI	OsI_10100
218192012	2.7.11.1	B8AMD2_ORYSI	OsI_09829
218192005	2.7.11.1	B8AMF4_ORYSI	OsI_09813
218191987	2.7.11.1	B8ALX6_ORYSI	OsI_09780
218191957	2.7.11.1	B8ALY6_ORYSI	OsI_09719
218191873	2.7.11.1	B8AFJ8_ORYSI	OsI_09556
218191833	2.7.11.1	B8AF73_ORYSI	OsI_09473
218191809	2.7.11.1	B8AET9_ORYSI	OsI_09430
218191775	2.7.11.1	B8AEF8_ORYSI	OsI_09360
218191725	2.7.11.1	B8AE28_ORYSI	OsI_09241
218191716	2.7.11.1	B8AE19_ORYSI	OsI_09217
218191675	2.7.11.1	B8AJH2_ORYSI	OsI_09151
218191647	2.7.11.1	B8AJ55_ORYSI	OsI_09091
218191565	2.7.11.1	B8AIF3_ORYSI	OsI_08906
218191557	2.7.11.1	B8AIE5_ORYSI	OsI_08893
218191499	2.7.11.1	B8AI39_ORYSI	OsI_08784
218191268	2.7.11.1	B8AG12_ORYSI	OsI_08279
218191253	2.7.11.1	B8AFZ7_ORYSI	OsI_08231
218191245	2.7.11.1	B8AFU8_ORYSI	OsI_08219
218191234	2.7.11.1	B8AFT2_ORYSI	OsI_08194
218191215	2.7.11.1	B8AFR3_ORYSI	OsI_08160
218191204	2.7.11.1	B8AFQ2_ORYSI	OsI_08138
218191194	2.7.11.1	B8AFT9_ORYSI	OsI_08119
218191176	2.7.11.1	B8AFG4_ORYSI	OsI_08080
218191173	2.7.11.1	B8AFG1_ORYSI	OsI_08073
218191158	2.7.11.1	B8AFE6_ORYSI	OsI_08051
218191076	2.7.11.1	B8AEP6_ORYSI	OsI_07867
218191002	2.7.11.1	B8ADZ8_ORYSI	OsI_07708
218190958	2.7.11.1	B8AJE6_ORYSI	OsI_07629
218190957	2.7.11.1	B8AJE5_ORYSI	OsI_07628
218190950	2.7.11.1	B8AJD8_ORYSI	OsI_07615
218190942	2.7.11.1	B8AJD0_ORYSI	OsI_07602
218190876	2.7.11.1	B8AIY9_ORYSI	OsI_07476
218190763	2.7.11.1	B8AHY6_ORYSI	OsI_07246
218190615	2.7.11.1	B8AGL3_ORYSI	OsI_06987
218190533	2.7.11.1	B8AFW7_ORYSI	OsI_06846
218190500	2.7.11.1	B8AFM8_ORYSI	OsI_06771
218190380	2.7.11.1	B8AEZ9_ORYSI	OsI_06513
218190374	2.7.11.1	B8AEL9_ORYSI	OsI_06492
218190373	2.7.11.1	B8AEL8_ORYSI	OsI_06491
218190366	2.7.11.1	B8AEK6_ORYSI	OsI_06477
218190361	2.7.11.1	B8AEK1_ORYSI	OsI_06468
218190358	2.7.11.1	B8AEJ8_ORYSI	OsI_06463
218190331	2.7.11.1	B8AE88_ORYSI	OsI_06403
218190320	2.7.11.1	B8AE74_ORYSI	OsI_06374
218190319	2.7.11.1	B8AE73_ORYSI	OsI_06373
218190311	2.7.11.1	B8AE65_ORYSI	OsI_06357
218190308	2.7.11.1	B8AE62_ORYSI	OsI_06351
218190307	2.7.11.1	B8AE61_ORYSI	OsI_06350
218190299	2.7.11.1	B8AE87_ORYSI	OsI_06336
218190228	2.7.11.1	B8AJ94_ORYSI	OsI_06182
218190212	2.7.11.1	B8AJ78_ORYSI	OsI_06147
218190180	2.7.11.1	B8AIW0_ORYSI	OsI_06080
218190172	2.7.11.1	B8AIL1_ORYSI	OsI_06067
218190128	2.7.11.1	B8AI85_ORYSI	OsI_05981
218190099	2.7.11.1	B8AI52_ORYSI	OsI_05915
218190097	2.7.11.1	B8AI50_ORYSI	OsI_05913
218190096	2.7.11.1	B8AI49_ORYSI	OsI_05912
218190095	2.7.11.1	B8AI84_ORYSI	OsI_05910
218190092	2.7.11.1	B8AI81_ORYSI	OsI_05905
218190091	2.7.11.1	B8AHV3_ORYSI	OsI_05902
218190087	2.7.11.1	B8AHU9_ORYSI	OsI_05896
218190086	2.7.11.1	B8AHU8_ORYSI	OsI_05895
218190085	2.7.11.1	B8AHU7_ORYSI	OsI_05892
218190081	2.7.11.1	B8AHT9_ORYSI	OsI_05886
218190073	2.7.11.1	B8AHT1_ORYSI	OsI_05872
218190013	2.7.11.1	B8AHD4_ORYSI	OsI_05769
218189969	2.7.11.1	B8AGZ4_ORYSI	OsI_05678
218189934	2.7.11.1	B8AGJ3_ORYSI	OsI_05618
[truncated: 1,525 more rows]

## Sheet: Sheet2
EC No. and the corresponding reactions that are present in the model
Out of 1136 reactions present in the model 1026 reactions are provided with their respective EC numbers. This list does not include the transporters (there are 92 transporters in the model) and 18 other reactions (sheet 3).
The reactions provided here includes also the reactions that are present in multiple compartments. chl, chloroplast; mit, mitochondrion; per, peroxisome.
EC No.	Reaction Name
1.1.1.1	RXN-7700
1.1.1.1	RXN-7706
6.3.1.2	GLUTAMINESYN-RXN/chl_GLUTAMINESYN
2.7.1.26	RIBOFLAVINKIN-RXN
3.2.1.2	RXN-1827
6.3.2.19	UBIQUITIN--PROTEIN-LIGASE-RXN
2.4.1.12	CELLULOSE-SYNTHASE-UDP-FORMING-RXN
4.2.1.104	R524-RXN
3.6.1.15	NUCLEOSIDE-TRIPHOSPHATASE-RXN
1.1.1.37	MALATE-DEH-RXN/mit_MalDH
1.1.1.27	L-LACTATE-DEHYDROGENASE-RXN
1.5.99.12	RXN-4621
1.5.99.12	RXN-4641
1.5.99.12	RXN-4661
1.5.99.12	RXN-4662
1.5.99.12	RXN-4681
4.4.1.14	4.4.1.14-RXN
2.7.1.1	RXN-1685
2.7.1.1	HEXOKINASE-RXN
3.2.1.22	ALPHAGALACTOSID-RXN
1.2.1.38	N-ACETYLGLUTPREDUCT-RXN
1.3.1.33	RXN-5285
1.2.1.70	chl_GLUTRNAREDUCTRXN
1.1.1.25	SHIKIMATE-5-DEHYDROGENASE-RXN
5.3.1.1	TRIOSEPISOMERIZATION-RXN/chl_TPI
3.1.1.11	PECTINESTERASE-RXN
1.5.5.1	1.5.5.1-RXN
2.7.1.107	DIACYLGLYKIN-RXN
3.1.1.11	RXN-2102
2.5.1.18	GST-RXN
2.5.1.18	GSHTRAN-RXN
3.1.4.4	PHOSCHOL-RXN
4.2.1.51	PREPHENATEDEHYDRAT-RXN
3.2.1.28	TREHALA-RXN
2.7.6.2	THIAMIN-PYROPHOSPHOKINASE-RXN
1.7.7.1	chl_FERREDOXINNITRITEREDUCTASERXN
2.7.7.3	PANTEPADENYLYLTRAN-RXN
1.11.1.7	PEROXID-RXN
3.6.1.1	INORGPYROPHOSPHAT-RXN
2.6.1.42	BRANCHED-CHAINAMINOTRANSFERILEU-RXN
2.7.4.6	DADPKIN-RXN
2.7.4.6	DCDPKIN-RXN
2.7.4.6	DGDPKIN-RXN
2.7.4.6	DTDPKIN-RXN
2.7.4.6	DUDPKIN-RXN
2.7.4.6	NUCLEOSIDE-DIP-KIN-RXN
2.7.4.6	UDPKIN-RXN
2.5.1.54	DAHPSYN-RXN
2.7.1.48	URIDINEKIN-RXN
2.7.1.40	PEPDEPHOS-RXN/chl_PyrK
2.7.1.39	HOMOSERKIN-RXN
4.1.2.13	RXN-8631
4.1.2.13	F16ALDOLASE-RXN
4.1.2.13	chl_Ald1
4.1.2.13	chl_Ald2
1.15.1.1	SUPEROX-DISMUT-RXN/per_SUPEROX-DISMUT-RXN
1.1.1.1	ALCOHOL-DEHYDROG-RXN
1.1.1.1	R542-RXN
1.1.1.1	RXN-6021
1.1.1.1	RXN-7657
1.1.1.1	RXN-7693
1.1.1.1	RXN-7694
3.1.1.4	RXN-1501
3.1.1.4	PHOSPHOLIPASE-A2-RXN
4.2.1.1	CARBODEHYDRAT-RXN
4.1.1.48	IGPSYN-RXN
4.2.1.10	3-DEHYDROQUINATE-DEHYDRATASE-RXN
2.7.2.4	ASPARTATEKIN-RXN
1.1.1.3	HOMOSERDEHYDROG-RXN-(NADP)/HOMOSERDEHYDROG-RXN-(NAD)
4.99.1.1	PROTOHEMEFERROCHELAT-RXN
2.7.1.90	2.7.1.90-RXN
2.7.1.11	6PFRUCTPHOS-RXN
2.7.7.27	chl_G1P_ADPTrans
2.7.1.48	URKI-RXN
4.1.1.31	PEPCARBOX-RXN
5.1.3.2	UDPGLUCEPIM-RXN
2.7.1.23	NAD-KIN-RXN/NADH-KINASE-RXN
2.3.1.48	HISTONE-ACETYLTRANSFERASE-RXN
1.1.1.8	1.1.1.8-RXN
5.4.4.2	ISOCHORSYN-RXN
2.1.1.43	HISTONE-LYSINE-N-METHYLTRANSFERASE-RXN
4.2.1.11	2PGADEHYDRAT-RXN
5.3.1.8	MANNPISOM-RXN
2.1.1.127	2.1.1.127-RXN
4.1.1.50	SAMDECARB-RXN
6.3.4.3	FORMATETHFLIG-RXN
1.14.17.4	ETHYL-RXN
1.14.13.93	1.14.13.93-RXN
3.2.1.1	ALPHA-AMYL-RXN
3.2.1.1	RXN-1823
3.2.1.1	RXN0-5181
5.3.1.9	PGLUCISOM-RXN/chl_PGI
5.3.1.9	RXN-6182
6.3.2.6	SAICARSYN-RXN
2.4.2.29	QUEUOSINE-TRNA-RIBOSYLTRANSFERASE-RXN
3.2.1.23	BETAGALACTOSID-RXN
3.2.1.23	KETOLACTOSE-RXN
1.1.1.34	1.1.1.34-RXN
1.14.13.8	RXN66-81
5.1.3.1	RIBULP3EPIM-RXN
3.2.1.51	ALPHA-L-FUCOSIDASE-RXN
2.3.3.10	HYDROXYMETHYLGLUTARYL-COA-SYNTHASE-RXN
3.1.1.31	6PGLUCONOLACT-RXN
2.7.1.33	PANTOTHENATE-KIN-RXN
4.2.3.4	3-DEHYDROQUINATE-SYNTHASE-RXN
2.7.7.9	GLUC1PURIDYLTRANS-RXN
2.4.2.19	QUINOPRIBOTRANS-RXN
4.1.2.25	H2NEOPTERINALDOL-RXN
1.6.5.4	RXN-3522
1.2.1.12	GAPOXNPHOSPHN-RXN
4.2.1.122	RXN0-2382
4.2.1.20	TRYPSYN-RXN
1.1.1.44	6PGLUCONDEHYDROG-RXN
2.1.1.76	QUERCETIN-3-O-METHYLTRANSFERASE-RXN
4.2.1.3	mit_AconDHatase
4.2.1.3	mit_AconHydr
6.3.4.13	GLYRIBONUCSYN-RXN
4.4.1.5	GLYOXI-RXN
1.14.19.2	RXN-7903
3.5.4.10	IMPCYCLOHYDROLASE-RXN
2.1.2.3	AICARTRANSFORM-RXN
6.2.1.12	4-COUMARATE--COA-LIGASE-RXN
6.2.1.12	RXN-1122
6.2.1.12	RXN-1126
2.1.3.3	RXN-9
2.1.3.2	ASPCARBTRANS-RXN
2.4.1.14	SUCROSE-PHOSPHATE-SYNTHASE-RXN
2.7.1.137	1-PHOSPHATIDYLINOSITOL-3-KINASE-RXN
6.3.5.2	GMP-SYN-GLUT-RXN
6.6.1.1	chl_RXN1F20
1.2.1.8	BADH-RXN
5.3.1.5	GLUCISOM-RXN
4.1.1.19	ARGDECARBOX-RXN
5.4.99.5	CHORISMATEMUT-RXN
1.1.1.95	PGLYCDEHYDROG-RXN
4.1.1.15	GLUTDECARBOX-RXN
1.9.3.1	CYTOCHROME-C-OXIDASE-RXN
2.1.2.2	GART-RXN
1.13.11.12	LIPOXYGENASE-RXN
1.13.11.12	RXN-1321
1.11.1.6	per_CATRXN
5.4.3.8	chl_GSAAMINOTRANSRXN
3.5.1.88	3.5.1.88-RXN
2.1.1.77	2.1.1.77-RXN
1.11.1.6	RXN66-1
4.2.1.9	DIHYDROXYISOVALDEHYDRAT-RXN
2.7.1.130	TETRAACYLDISACC4KIN-RXN
1.18.1.2	1.18.1.2-RXN
6.3.5.1	NAD-SYNTH-GLN-RXN/GLUTAMIN-RXN
1.14.11.15	RXN1F-170
5.3.1.6	RIB5PISOM-RXN
1.2.1.27	1.2.1.27-RXN
2.2.1.7	chl_DXSRXN
5.4.2.3	PHOSACETYLGLUCOSAMINEMUT-RXN
2.5.1.21	2.5.1.21-RXN
2.5.1.21	RXN66-281
2.1.1.41	RXN-4021
2.1.1.41	RXN3O-178
2.4.1.119	2.4.1.119-RXN
2.5.1.16	SPERMIDINESYN-RXN
3.1.3.2	ACID-PHOSPHATASE-RXN
6.3.2.2	GLUTCYSLIG-RXN
2.5.1.6	S-ADENMETSYN-RXN
2.4.2.7	ADENPRIBOSYLTRAN-RXN
1.1.99.5	RXN-6841
4.1.3.1	ISOCIT-CLEAV-RXN
5.3.3.2	chl_IPPISOMRXN
1.10.99.1	PLASTOQUINOL--PLASTOCYANIN-REDUCTASE-RXN
3.2.1.52	3.2.1.52-RXN
2.5.1.29	chl_FARNESYLTRANSTRANSFERASERXN
2.3.1.1	N-ACETYLTRANSFER-RXN
2.4.1.13	RXN-6222
2.4.1.13	SUCROSE-SYNTHASE-RXN
2.4.1.25	AMYLOMALT-RXN
1.11.1.15	1.11.1.15-RXN
2.7.4.9	DTMPKI-RXN
1.4.7.1	chl_GLUTAMATESYN_FERREDOXIN
2.5.1.43	2.5.1.43-RXN
3.5.4.6	AMP-DEAMINASE-RXN
1.2.4.2	2OXOGLUTDECARB-RXN
1.13.11.5	HOMOGENTISATE-12-DIOXYGENASE-RXN
1.3.3.6	ACYL-COA-OXIDASE-RXN
1.14.13.79	1.14.13.79-RXN
1.14.13.79	RXN1F-160
1.14.13.79	RXN1F-161
1.1.1.44	RXN-3341
3.2.2.9	ADENOSYLHOMOCYSTEINE-NUCLEOSIDASE-RXN
2.1.1.11	chl_RXNMGPROTOPORPHYRINMETHYLESTERSYN
2.2.1.1	1TRANSKETO-RXN/chl_TKL1
2.2.1.1	2TRANSKETO-RXN/chl_TKL2
2.5.1.19	2.5.1.19-RXN
4.2.1.47	GDPMANDEHYDRA-RXN
4.2.2.2	4.2.2.2-RXN
6.3.4.2	CTPSYN-RXN
2.5.1.47	ACSERLY-RXN
3.6.1.15	ADENOSINETRIPHOSPHATASE-RXN
4.1.1.37	chl_UROGENDECARBOXRXN
1.1.1.23	RXN-8001
1.1.1.31	3-HYDROXYISOBUTYRATE-DEHYDROGENASE-RXN
3.6.1.7	ACYLPHOSPHATASE-RXN
6.3.5.4	ASNSYNB-RXN
1.2.1.2	1.2.1.2-RXN
2.6.1.1	3-SULFINOALANINE-AMINOTRANSFERASE-RXN
2.6.1.1	ASPAMINOTRANS-RXN
1.13.99.1	MYO-INOSITOL-OXYGENASE-RXN
1.5.1.2	PYRROLINECARBREDUCT-RXN-(NADP)/PYRROLINECARBREDUCT-RXN-(NAD)
3.1.3.16	3.1.3.16-RXN
1.4.4.2	mit_GCVMULTI
2.7.6.1	PRPPSYN-RXN
1.1.1.271	1.1.1.271-RXN
1.1.1.42	mit_IsoCitDH/ISOCITDEH-RXN
3.2.1.20	MALTODEXGLUCOSID-RXN
3.2.1.20	RXN-2141
3.2.1.20	RXN0-5183
1.14.15.7	RXN1F-357
4.1.3.27	ANTHRANSYN-RXN
4.2.1.24	chl_PORPHOBILSYNTHRXN
2.4.1.18	GLYCOGEN-BRANCH-RXN
2.4.1.18	RXN-7669
2.4.1.18	RXN-7710
2.5.1.32	2.5.1.32-RXN
2.5.1.32	RXN1F-144
5.2.1.8	PEPTIDYLPROLYL-ISOMERASE-RXN
6.3.5.3	FGAMSYN-RXN
2.1.1.12	METHIONINE-S-METHYLTRANSFERASE-RXN
4.1.3.36	NAPHTHOATE-SYN-RXN
3.1.4.11	3.1.4.11-RXN
1.8.1.4	DIHYDLIPOXN-RXN
1.8.1.4	RXN-7716
1.8.1.4	RXN-7719
1.8.1.4	RXN-8629
1.14.11.13	RXN-115
1.1.5.3	GLYC3PDEHYDROG-RXN
1.1.1.40	MALIC-NADP-RXN
2.4.2.10	OROPRIBTRANS-RXN
2.5.1.62	chl_RXN1F66
2.1.2.9	METHIONYL-TRNA-FORMYLTRANSFERASE-RXN
5.3.1.16	PRIBFAICARPISOM-RXN
2.7.9.1	PYRUVATEORTHOPHOSPHATE-DIKINASE-RXN
4.3.1.24	PHENYLALANINE-AMMONIA-LYASE-RXN
2.1.2.1	GLYOHMETRANS-RXN/mit_GLYOHMETRANS
2.4.2.14	PRPPAMIDOTRANS-RXN
2.1.1.103	2.1.1.103-RXN
2.1.1.103	RXN-5642
2.3.2.8	ARGINYLTRANSFERASE-RXN
2.1.1.103	RXN-5643
2.7.2.11	GLUTKIN-RXN
1.2.1.41	GLUTSEMIALDEHYDROG-RXN
2.4.2.9	URACIL-PRIBOSYLTRANS-RXN
3.5.4.25	GTP-CYCLOHYDRO-II-RXN
4.1.1.1	RXN-6161
4.1.1.1	RXN-7643
4.1.1.1	RXN-7692
5.4.2.1	3PGAREARR-RXN
1.6.2.2	CYTOCHROME-B5-REDUCTASE-RXN
2.5.1.1	chl_GPPSYNRXN
2.4.1.15	TREHALOSE6PSYN-RXN
2.5.1.1	RXN-7226
2.3.1.30	SERINE-O-ACETTRAN-RXN
4.2.3.1	THRESYN-RXN
1.1.1.86	ACETOLACTREDUCTOISOM-RXN
1.1.1.193	RIBOFLAVINSYNREDUC-RXN
3.5.4.26	RIBOFLAVINSYNDEAM-RXN
2.3.1.129	UDPNACETYLGLUCOSAMACYLTRANS-RXN
1.1.1.100	3-OXOACYL-ACP-REDUCT-RXN
2.2.1.6	ACETOLACTSYN-RXN
2.2.1.6	ACETOOHBUTSYN-RXN
1.14.13.90	RXN-7978
1.14.13.90	RXN-7979
4.1.1.65	PHOSPHASERDECARB-RXN
2.3.3.9	MALSYN-RXN
2.5.1.9	RIBOFLAVIN-SYN-RXN
3.2.1.26	RXN-1461
3.2.1.26	3.2.1.26-RXN
1.13.11.51	RXN-698
1.13.11.51	RXN-7973
1.13.11.51	RXN-7974
3.6.3.4	3.6.3.4-RXN
1.11.1.9	GLUTATHIONE-PEROXIDASE-RXN
2.6.1.42	BRANCHED-CHAINAMINOTRANSFERLEU-RXN
2.6.1.42	BRANCHED-CHAINAMINOTRANSFERVAL-RXN
2.4.1.182	LIPIDADISACCHARIDESYNTH-RXN
2.7.1.6	GALACTOKIN-RXN
4.2.3.19	4.2.3.19-RXN
4.2.1.19	IMIDPHOSDEHYD-RXN
2.3.1.41	3-OXOACYL-ACP-SYNTH-BASE-RXN
2.3.1.41	3-OXOACYL-ACP-SYNTH-RXN
2.7.1.30	GLYCEROL-KIN-RXN
3.5.4.16	GTP-CYCLOHYDRO-I-RXN
2.7.1.100	5-METHYLTHIORIBOSE-KINASE-RXN
2.7.7.41	CDPDIGLYSYN-RXN
5.4.2.8	PHOSMANMUT-RXN
2.7.1.21	DURIDKI-RXN
2.7.1.21	THYKI-RXN
2.1.1.143	2.1.1.143-RXN
6.3.4.4	ADENYLOSUCCINATE-SYNTHASE-RXN
2.1.1.10	HOMOCYSTEINE-S-METHYLTRANSFERASE-RXN
2.1.1.10	MMUM-RXN
4.2.1.75	chl_UROGENIIISYNRXN
5.5.1.4	MYO-INOSITOL-1-PHOSPHATE-SYNTHASE-RXN
3.1.3.11	F16BDEPHOS-RXN
2.3.1.35	GLUTAMATE-N-ACETYLTRANSFERASE-RXN
2.7.8.5	PHOSPHAGLYPSYN-RXN
2.3.1.39	MALONYL-COA-ACP-TRANSACYL-RXN
4.3.2.2	AICARSYN-RXN
4.3.2.2	AMPSYN-RXN
1.1.1.49	GLU6PDEHYDROG-RXN
4.2.1.2	FUMHYDR-RXN
2.5.1.48	O-SUCCHOMOSERLYASE-RXN
1.1.1.85	3-ISOPROPYLMALDEHYDROG-RXN
2.7.1.68	2.7.1.68-RXN
3.2.1.21	RXN-8036
3.2.1.21	RXN-7082
3.2.1.21	RXN-5341
2.7.1.67	1-PHOSPHATIDYLINOSITOL-KINASE-RXN
1.17.1.2	chl_ISPH2RXNNADP
1.17.1.2	chl_RXN0884NADP
2.4.1.1	GLYCOPHOSPHORYL-RXN
2.4.1.1	GLYMALTOPHOSPHORYL-RXN
2.4.1.1	RXN-1826
2.4.1.1	RXN0-5182
1.2.1.11	ASPARTATE-SEMIALDEHYDE-DEHYDROGENASE-RXN
4.2.1.92	HYDROPEROXIDE-DEHYDRATASE-RXN
4.2.1.92	RXN1F-19
1.1.1.205	IMP-DEHYDROG-RXN
2.7.7.2	FADSYN-RXN
3.1.3.2	RXN-5822
5.5.1.6	RXN-7647
5.5.1.6	CHALCONE-ISOMERASE-RXN
5.5.1.6	APIGNAR-RXN
6.3.3.1	AIRS-RXN
2.4.2.11	NICOTINATEPRIBOSYLTRANS-RXN
2.7.8.11	2.7.8.11-RXN
4.2.1.33	3-ISOPROPYLMALISOM-RXN
1.10.3.2	LACCASE-RXN
6.3.4.15	BIOTINLIG-RXN
1.13.11.27	4-HYDROXYPHENYLPYRUVATE-DIOXYGENASE-RXN
2.5.1.61	chl_OHMETHYLBILANESYNRXN
1.1.1.195	CINNAMYL-ALCOHOL-DEHYDROGENASE-RXN
1.1.1.195	RXN-1102
1.1.1.195	RXN-1125
3.7.1.2	FUMARYLACETOACETASE-RXN
5.3.1.24	PRAISOM-RXN
4.2.1.17	ENOYL-COA-HYDRAT-RXN
4.2.1.17	METHYLACYLYLCOA-HYDROXY-RXN
4.2.1.119	RXN-6383
4.2.1.119	RXN-7699
4.2.1.17	RXN-7838
4.2.1.17	TIGLYLCOA-HYDROXY-RXN
1.1.1.35	OHACYL-COA-DEHYDROG-RXN
5.5.1.13	5.5.1.13-RXN
4.1.1.20	DIAMINOPIMDECARB-RXN
2.7.1.71	SHIKIMATE-KINASE-RXN
2.7.4.6	chl_CDPKINRXN
1.17.7.1	chl_RXN0882
2.4.1.198	2.4.1.198-RXN
2.7.1.20	ADENOSINE-KINASE-RXN
2.7.2.8	ACETYLGLUTKIN-RXN
2.7.1.4	FRUCTOKINASE-RXN
2.1.3.3	ORNCARBAMTRANSFER-RXN
2.7.11.1	PROTEIN-KINASE-RXN
6.2.1.3	RXN-7904
6.2.1.3	ACYLCOASYN-RXN
6.2.1.3	R223-RXN
1.3.2.3	GALACTONOLACTONE-DEHYDROGENASE-RXN
1.5.1.9	1.5.1.9-RXN
4.1.3.4	HYDROXYMETHYLGLUTARYL-COA-LYASE-RXN
2.3.1.51	1-ACYLGLYCEROL-3-P-ACYLTRANSFER-RXN
1.8.1.9	THIOREDOXIN-REDUCT-NADPH-RXN
4.4.1.8	CYSTATHIONINE-BETA-LYASE-RXN
2.3.1.47	7KAPSYN-RXN
2.3.1.50	SERINE-C-PALMITOYLTRANSFERASE-RXN
2.4.1.215	RXN-4735
1.14.11.9	NARINGENIN-3-DIOXYGENASE-RXN
5.5.1.9	CYCLOEUCALENOL-CYCLOISOMERASE-RXN
5.3.4.1	5.3.4.1-RXN
2.3.1.144	ANTHRANILATE-N-BENZOYLTRANSFERASE-RXN
1.3.3.4	chl_PROTOPORGENOXIRXN
2.5.1.15	H2PTEROATESYNTH-RXN
2.5.1.48	CYSPH-RXN
2.6.1.2	ALANINE-AMINOTRANSFERASE-RXN/per_ALANINE-AMINOTRANSFERASE-RXN
5.1.3.3	ALDOSE1EPIM-RXN
5.1.3.3	ALDOSE-1-EPIMERASE-RXN
2.1.1.104	CAFFEOYL-COA-O-METHYLTRANSFERASE-RXN
3.5.1.5	UREASE-RXN
2.4.1.46	2.4.1.46-RXN
1.1.1.219	RXN-7784
1.1.1.219	RXN-600
1.1.1.219	DIHYDROKAEMPFEROL-4-REDUCTASE-RXN
2.3.1.9	ACETYL-COA-ACETYLTRANSFER-RXN
1.3.1.42	12-OXOPHYTODIENOATE-REDUCTASE-RXN
3.1.3.4	PHOSPHATIDATE-PHOSPHATASE-RXN
2.7.4.3	ADENYL-KIN-RXN/chl_ADENYLKINRXN
2.7.7.13	2.7.7.13-RXN
2.2.1.2	TRANSALDOL-RXN
2.7.8.15	2.7.8.15-RXN
2.7.1.17	XYLULOKIN-RXN
1.4.1.13	chl_GLUTAMATESYN
5.4.2.2	PHOSPHOGLUCMUT-RXN/chl_PGM
1.2.3.1	ALDEHYDE-OXIDASE-RXN
2.3.1.119	ICOSANOYL-COA-SYNTHASE-RXN
6.3.5.5	CARBPSYN-RXN
3.1.1.1	CARBOXYLESTERASE-RXN
3.5.4.5	CYTIDEAM2-RXN
1.8.5.1	per_1.8.5.1-RXN
1.17.4.1	UDPREDUCT-RXN
3.1.3.7	325-BISPHOSPHATE-NUCLEOTIDASE-RXN
2.1.1.114	2.1.1.114-RXN
2.6.1.44	per_ALANINEGLYOXYLATEAMINOTRANSFERASERXN
1.1.1.284	RXN-2962-(NAD)/RXN-2962-(NADP)
1.14.13.70	1.14.13.70-RXN
2.3.2.15	2.3.2.15-RXN
2.4.2.-	GLUTAMIDOTRANS-RXN
3.13.1.1	RXN-1223
2.4.2.18	PRTRANS-RXN
3.5.3.12	AGMATINE-DEIMINASE-RXN
4.1.2.27	SPHINGANINE-1-PHOSPHATE-ALDOLASE-RXN
5.3.3.5	RXN66-320
5.3.3.5	RXN-4161
1.1.1.267	chl_DXPREDISOMRXN
4.2.1.52	DIHYDRODIPICSYN-RXN
3.5.3.1	RXN-34
3.5.3.1	ARGINASE-RXN
1.1.1.22	UGD-RXN
3.6.1.23	DUTP-PYROP-RXN
2.6.1.13	ORNITHINE-GLU-AMINOTRANSFORASE-RXN
2.6.1.13	ORNITHINE--OXO-ACID-AMINOTRANSFERASE-RXN
1.17.1.4	RXN0-901
3.1.2.6	GLYOXII-RXN
2.7.4.8	GUANYL-KIN-RXN
2.7.4.12	GMKALT-RXN
1.14.13.39	NITRIC-OXIDE-SYNTHASE-RXN
2.7.7.23	NAG1P-URIDYLTRANS-RXN
2.4.1.241	RXN-1225
1.2.1.9	1.2.1.9-RXN
1.4.3.5	PNPOXI-RXN
1.4.3.5	PMPOXI-RXN
2.7.7.1	2.7.7.1-RXN
1.14.11.23	RXN-527
1.3.1.83	chl_RXN7660
1.3.1.83	chl_RXN7659
1.3.1.83	chl_RXN7658
2.4.1.82	2.4.1.82-RXN
3.5.1.53	N-CARBAMOYLPUTRESCINE-AMIDASE-RXN
2.6.1.5	TYROSINE-AMINOTRANSFERASE-RXN
3.5.2.2	DIHYDROPYRIMIDINASE-RXN
1.1.1.157	3-HYDROXYBUTYRYL-COA-DEHYDROGENASE-RXN
3.1.2.4	3-HYDROXYISOBUTYRYL-COA-HYDROLASE-RXN
2.5.1.58	2.5.1.58-RXN
4.1.1.21	AIRCARBOXY-RXN
2.6.1.9	HISTAMINOTRANS-RXN
1.10.99.3	RXN-7984
2.5.1.10	chl_FPPSYNRXN
2.1.1.107	UROPORIIIMETHYLTRANSA-RXN
3.5.1.23	CERAMIDASE-YEAST-RXN
3.1.3.24	SUCROSE-PHOSPHATASE-RXN
2.1.2.11	3-CH3-2-OXOBUTANOATE-OH-CH3-XFER-RXN
6.4.1.2	ACETYL-COA-CARBOXYLTRANSFER-RXN
6.4.1.2	RXN0-5055
1.1.1.23	HISTALDEHYD-RXN
1.1.1.23	HISTOLDEHYD-RXN
2.6.1.16	L-GLN-FRUCT-6-P-AMINOTRANS-RXN
2.3.3.13	2-ISOPROPYLMALATESYN-RXN
2.5.1.3	THI-P-SYN-RXN
2.7.7.50	MRNA-GUANYLYLTRANSFERASE-RXN
2.5.1.55	KDO-8PSYNTH-RXN
6.3.4.5	ARGSUCCINSYN-RXN
6.3.4.5	RXN-10
6.3.2.3	GLUTATHIONE-SYN-RXN
1.5.1.3	DIHYDROFOLATEREDUCT-RXN
2.1.1.45	THYMIDYLATESYN-RXN
3.6.1.31	HISTPRATPHYD-RXN
5.1.1.7	DIAMINOPIMEPIM-RXN
6.4.1.4	METHYLCROTONYL-COA-CARBOXYLASE-RXN
2.1.1.14	HOMOCYSMET-RXN
2.7.6.3	H2PTERIDINEPYROPHOSPHOKIN-RXN
3.3.1.1	ADENOSYLHOMOCYSTEINASE-RXN
2.3.1.74	NARINGENIN-CHALCONE-SYNTHASE-RXN
2.1.1.37	2.1.1.73-RXN
2.7.1.36	MEVALONATE-KINASE-RXN
1.3.1.33	chl_RXN1F10/RXN1F-10
1.1.1.1	RXN-5424
1.2.1.3	RXN-10917
1.1.1.294	RXN-7678
2.3.1.41	RXN-11479
1.1.1.35	RXN0-2044
3.2.1.21	RXN-9674
2.3.1.41	RXN-10658
1.13.11.27	RXN-10815
2.7.4.14	chl_CMPKIRXN/CMPKI-RXN
4.1.2.25	RXN-10857
5.3.3.8	RXN-7931
3.6.4.6	3.6.4.6-RXN
2.7.1.134	2.7.1.134-RXN
4.1.2.8	RXN0-2381
3.1.1.1	RXN-10767
4.2.1.119	RXN-11750
3.1.3.5	RXN-7609
2.7.7.4	SULFATE-ADENYLYLTRANSFERASE-ADP-RXN
3.4.24.84	RXN-11698
2.3.1.180	RXN-11474
4.1.1.36	P-PANTOCYSDECARB-RXN
2.3.1.117	TETHYDPICSUCC-RXN
2.3.2.2	RXN-9157
1.3.3.6	RXN-10707
6.2.1.3	RXN-9644
2.4.1.32	2.4.1.32-RXN
2.3.1.16	RXN-10700
2.3.1.64	AGMATINE-N4-COUMAROYLTRANSFERASE-RXN
4.1.2.8	RXN-1407
1.8.7.2	RXN-9944
4.2.99.18	RXN0-2601
4.1.1.37	RXN-10642
2.6.1.1	RXN-11737
1.5.3.14	RXN-10465
2.1.1.114	RXN-9282
2.7.1.151	2.7.1.151-RXN
1.3.1.26	DIHYDROPICRED-RXN-(NADP)/DIHYDROPICRED-RXN-(NAD)
2.5.1.78	AMINO-RIBOSYLAMINO-1H-3H-PYR-DIONE_RXN
4.6.1.12	chl_RXN0302
1.3.3.3	chl_RXN01461
4.1.1.39	chl_Rubisco/chl_RuBPOxid
2.7.1.19	chl_Ru5Pk
1.2.1.59	chl_G3Pdh
1.14.13.81	chl_RXN5283
2.7.1.148	chl_271148RXN
1.14.13.81	chl_RXN5282
2.7.7.60	chl_27760RXN
6.1.1.18	chl_61118RXN
1.14.13.81	chl_RXN5284
2.4.1.21	chl_StSynth
1.3.1.75	chl_RXN1F72
1.6.5.4	per_1.6.5.4-RXN
3.1.3.15	HISTIDPHOS-RXN
4.1.1.1	PYRUVATEDECARB-RXN
4.3.1.19	THR-DEAMINASE-RXN
3.5.4.12	DCMP-DEAMINASE-RXN
1.1.1.37	MALIC-NAD-RXN
2.3.3.8	ATP-CITRATE-PRO-S--LYASE-RXN
2.6.1.78	PREPHENATE-TRANSAMINE-RXN
1.1.1.100	RXN-11480
2.1.1.163	RXN-9361
1.1.1.1	RXN-5444
1.2.1.3	RXN6666-5
1.8.1.4	1.8.1.4-RXN
1.3.3.6	RXN-10696
1.1.1.100	RXN-9556
4.1.99.12	DIOHBUTANONEPSYN-RXN
2.3.1.51	RXN0-5514
2.3.1.41	RXN-9516
3.5.4.9	RXN-6282
2.3.1.12	DIHYDLIPACETRANS-RXN
1.14.99.7	RXN66-282
1.2.1.3	RXN-4142
2.7.1.139	2.7.1.139-RXN
2.4.1.227	RXN-8976
1.1.1.100	RXN1G-481
2.3.1.4	GLUCOSAMINEPNACETYLTRANS-RXN
3.1.1.1	RXNQT-4366
1.3.3.6	RXN-10706
1.6.2.4	NADPH--FERRIHEMOPROTEIN-REDUCTASE-RXN
3.6.5.5	3.6.5.5-RXN
1.14.11.23	RXN1F-93
1.3.5.2	RXN0-6491
1.2.3.1	RXN66-62
1.1.1.100	RXN1G-72
1.1.1.100	RXN-9524
1.2.1.3	RXN-10912
2.3.1.158	RXN-1641
2.7.7.18	NICONUCADENYLYLTRAN-RXN
1.4.3.16	RXN-9772
1.6.5.2	NQOR-RXN
1.1.1.100	RXN-9552
4.2.3.33	RXN-4882
1.1.1.100	RXN-10655
1.11.1.12	1.11.1.12-RXN
3.5.5.4	3.5.5.4-RXN
2.6.1.1	RXN-10814
2.1.1.163	ADOMET-DMK-METHYLTRANSFER-RXN
1.8.4.9	1.8.4.9-RXN
4.2.1.17	RXN0-6513
4.2.1.17	RXN-10625
1.1.1.100	RXN1G-469
3.5.1.23	CERAMIDASE RXN
1.2.1.24	SUCCINATE-SEMIALDEHYDE-DEHYDROGENASE-RXN
2.4.1.83	2.4.1.83-RXN
2.1.1.125	2.1.1.125-RXN
1.2.3.1	RXN-8093
2.4.1.25	RXN-9023
3.5.1.98	3.5.1.98-RXN
1.2.1.3	RXN-10715
2.7.1.133	2.7.1.133-RXN
3.1.3.56	RXN-8730
3.1.3.5	AMP-DEPHOSPHORYLATION-RXN
1.1.1.35	RXN-10702
1.1.1.100	RXN-9633
1.1.1.100	RXN1G-951
1.2.1.3	RXN-10780
3.1.3.77	3.1.3.77-RXN
2.1.1.163	RXN-9205
1.1.3.15	S-2-HYDROXY-ACID-OXIDASE-RXN
2.3.1.41	RXN1G-1003
4.2.1.17	RXN-10705
1.1.1.100	RXN1G-881
1.4.3.21	AMINEOXID-RXN
2.5.1.75	RXN0-6274
2.8.1.8	RXN0-949
3.4.21.105	3.4.21.105-RXN
1.5.3.15	RXN-10463
1.11.1.15	RXN0-5468
1.8.4.11	RXN-8668
2.4.1.227	RXN-11346
4.2.1.17	RXN-11244
3.5.2.2	RXN-11211
1.2.3.1	RXN-8092
1.1.1.1	RXN-10781
3.2.1.52	RXN0-5226
4.1.99.13	RXN-10771
4.2.3.35	RXN-4883
2.7.7.63	RXN-8654
2.3.1.41	RXN-9523
1.1.1.157	RXN-11662
1.1.1.8	RXN0-5260
2.3.1.41	RXN1G-460
4.2.1.11	R145-RXN
3.2.2.3	INOSINE-NUCLEOSIDASE-RXN
1.1.1.100	RXN-9518
2.7.7.41	RXN0-5515
5.5.1.14	RXN-8528
1.1.1.100	RXN-9532
1.1.1.100	RXN1G-1053
2.5.1.46	2.5.1.46-RXN
5.1.2.3	5.1.2.3-RXN
1.10.3.1	CATECHOL-OXIDASE-RXN
4.2.3.29	RXN-7788
3.1.2.6	RXN-7919
2.5.1.32	RXNARA-8002
5.1.2.3	OHBUTYRYL-COA-EPIM-RXN
1.1.1.100	RXN0-2142
2.7.7.64	2.7.7.64-RXN
6.2.1.12	RXN-10919
2.3.1.41	RXN-9535
2.6.1.80	2.6.1.80-RXN
3.5.5.1	3.5.5.1-RXN
1.3.3.6	RXN-11026
1.5.3.15	RXN-10747
1.14.11.23	RXN-8450
6.3.2.5	P-PANTOCYSLIG-RXN
2.7.9.4	2.7.9.4-RXN
2.7.4.14	RXN-7913
2.7.13.3	2.7.13.3-RXN
3.1.3.25	RXN-10954
1.1.1.295	RXN-9290
6.2.1.3	RXN-9623
3.5.1.23	RXN-11375
3.1.3.5	5-NUCLEOTID-RXN
2.3.1.41	RXN-9539
3.2.1.152	3.2.1.152-RXN
3.1.3.25	RXN-10949
3.2.2.3	URIDINE-NUCLEOSIDASE-RXN
1.8.3.2	THIOL-OXIDASE-RXN
2.5.1.64	2.5.1.64-RXN
1.3.1.78	1.3.1.78-RXN
1.1.1.195	RXN-11654
4.2.3.29	RXN-4884
2.5.1.74	DMK-RXN
2.7.1.4	RXN-11503
1.6.4.4	1.6.4.4-RXN
3.5.5.1	RXN-1404
1.17.4.1	ADPREDUCT-RXN
1.1.1.100	RXN-9514
4.2.3.28	RXN-4881
1.2.1.3	RXN66-3
1.8.4.11	RXN-8669
2.4.1.227	NACGLCTRANS-RXN
1.14.11.23	RXN-7999
4.2.1.17	RXN-11245
1.2.1.3	RXN-10089
1.1.1.100	RXN-9536
1.1.1.100	RXN-9528
4.2.1.17	RXN-10698
1.1.1.1	RXN-10911
2.3.1.41	2.3.1.41-RXN
1.2.1.3	RXN-37
1.1.1.44	RXN-9952
1.2.1.3	RXN-6382
4.2.99.18	4.2.99.18-RXN
1.2.3.1	RXN-8094
2.6.1.83	RXN-7737
1.8.4.12	1.8.4.12-RXN
1.10.3.1	RXN-8332
2.3.1.199	RXN-9632
1.1.1.1	RXN3O-4113
1.6.5.3	NADH-DEHYDROGENASE-QUINONE-RXN
3.2.1.68	RXN-4301
2.1.1.107	RXN-8675
2.3.1.180	2.3.1.180-RXN
1.1.1.100	RXN-11476
1.1.1.100	RXN1G-157
2.2.1.1	RXN-9583
2.7.1.151	RXN-7162
4.2.1.1	RXN0-5224
2.3.1.199	RXN0-6512
1.1.1.100	RXN-9540
2.4.1.34	13-BETA-GLUCAN-SYNTHASE-RXN
2.3.1.41	RXN-9531
1.1.1.1	RXN-10915
2.5.1.47	SULFOCYS-RXN
3.1.3.25	RXN-10952
2.1.1.163	RXN-11847
3.1.3.25	RXN-10953
2.5.1.60	RXN-3701
2.5.1.39	RXN-9230
1.1.1.100	RXN1G-260
2.1.1.37	DNA-CYTOSINE-5--METHYLTRANSFERASE-RXN
2.1.1.163	RXN-9191
1.14.13.122	RXN-7677
2.7.1.25	ADENYLYLSULFKIN-RXN
1.1.1.8	RXN0-5258
2.1.1.163	RXN-9220
2.7.9.5	2.7.9.5-RXN
1.14.13.122	RXN-7676
5.1.3.5	UDP-ARABINOSE-4-EPIMERASE-RXN
1.1.1.100	RXN1G-358
2.5.1.74	RXN-9190
3.5.2.5	ALLANTOINASE-RXN
2.6.1.85	PABASYN-RXN
2.3.1.41	RXN1G-138
1.1.1.100	RXN1G-853
5.5.1.6	RXN-3221
1.1.1.100	RXN1G-287
1.11.1.7	RXN66-11
3.1.3.5	RXN-5841
2.3.1.41	RXN1G-132
2.1.1.163	RXN-11046
1.17.4.1	CDPREDUCT-RXN
1.1.1.100	RXN1G-1050
1.1.1.100	RXN1G-184
1.1.1.100	RXN1G-408
3.1.3.5	XMPXAN-RXN
4.2.1.91	CARBOXYCYCLOHEXADIENYL-DEHYDRATASE-RXN
2.3.1.41	RXN1G-324
2.3.1.41	RXN1G-306
1.1.1.100	RXN1G-203
2.3.1.41	RXN1G-236
1.1.1.100	RXN1G-617
1.2.1.3	RXN-9758
2.1.1.163	RXN-9362
6.2.1.3	RXN-11025
5.1.3.6	UDP-GLUCURONATE-4-EPIMERASE-RXN
1.1.1.100	RXN1G-613
1.1.1.100	RXN1G-384
6.2.1.1	ACETYL_COA_SYN
1.1.1.100	RXN1G-409
1.1.1.100	RXN1G-252
1.1.1.100	RXN1G-240
1.1.1.100	RXN1G-262
1.17.1.4	RXN-7682
1.1.1.100	RXN1G-840
1.1.1.100	RXN1G-637
1.1.1.100	RXN1G-717
2.6.1.4	per_GLYCINEAMINOTRANSFERASERXN
1.2.4.2	mit_AlphaKGDH
1.6.5.3	mit_Complex_I/NADH-DEHYDROG-A-RXN
1.3.5.1	mit_Complex_II/SUCCINATE-DEHYDROGENASE-(UBIQUINONE)-RXN
1.10.2.2	mit_Complex_III/1.10.2.2-RXN
1.10.3.11	mit_AOX
1.9.3.1	mit_Complex_IV
3.6.3.14	mit_Complex_V
1.1.3.15	per_RXN969
2.3.3.1/2.3.3.16	mit_CitSynth
1.2.4.1	mit_PyrDH
1.18.1.2	chl_FERREDOXINNADPHRXN
2.7.2.3	chl_PGK
2.7.4.6	CDPKIN-RXN
1.1.1.29	per_GLYCERATEDEHYDROGENASERXN
2.7.1.31	chl_GLY3KINRXN
6.2.1.5	mit_SucThioK
2.6.1.45	per_SERINEGLYOXYLATEAMINOTRANSFERASERXN
1.8.7.1	SULFITE-REDUCTASE-(FERREDOXIN)-RXN
4.2.1.11	chl_Eno
1.4.1.14	GLUTAMATE-SYNTHASE-NADH-RXN
2.3.1.158	2.3.1.158-RXN
1.3.8.4	ISOVALERYL-COA-FAD-RXN
2.7.1.43	GLUCURONOKINASE-RXN
2.1.1.14	HOMOCYSMETB12-RXN
2.1.1.100	2.1.1.100-RXN
2.1.1.62	2.1.1.62-RXN
1.6.2.2	RXN-11195
2.6.1.18	2.6.1.18-RXN
2.5.1.60	2.5.1.60-RXN
1.3.1.72	RXN66-28
1.4.4.2	GCVP-RXN
2.5.1.39	RXN-9222
3.6.1.22	NADPYROPHOSPHAT-RXN
2.1.1.68	RXN-1143
2.7.7.38	CPM-KDOSYNTH-RXN
1.4.3.22	1.4.3.22-Rxn
1.17.4.1	RXN0-748
2.8.1.7	RXN0-308
2.7.1.24	DEPHOSPHOCOAKIN-RXN
2.3.1.41	RXN1G-26
1.1.1.100	RXN1G-1247
3.6.1.1	chl_PPase
2.7.1.82	ETHANOLAMINE-KINASE-RXN
1.11.1.11	per_RXN-3521
2.3.1.15	RXN-1381
1.1.1.100	RXN1G-364
1.23.5.1	RXN-7985
2.1.1.64	2.1.1.64-RXN
3.5.2.3	DIHYDROOROT-RXN
6.2.1.3	RXN-9673
2.1.1.64	DHHB-METHYLTRANSFER-RXN
2.1.1.114	RXN-9287
1.4.3.21	AMINEPHEN-RXN
2.1.1.64	RXN-9237
3.6.1.17	3.6.1.17-RXN
1.14.13.70	RXN3O-130
4.2.1.17	RXN-10704
4.2.1.2	mit_Fumarase
2.7.11.2	2.7.11.2-RXN
4.3.2.1	ARGSUCCINLYA-RXN
3.1.3.25	RXN0-5408
4.2.3.5	CHORISMATE-SYNTHASE-RXN
2.1.1.64	RXN-11758
5.1.3.18	RXN-1882
5.2.1.2	MALEYLACETOACETATE-ISOMERASE-RXN
3.4.19.9	RXN-6641
3.6.3.6	ATPase
1.17.4.2	RXN0-745
1.14.13.70	RXN66-12
2.5.1.39	4OHBENZOATE-OCTAPRENYLTRANSFER-RXN
4.2.1.17	RXN-10697
3.1.3.11	chl_FBPase
1.2.1.3	ALDHDEHYDROG-RXN
1.14.11.9	1.14.11.9-RXN
1.1.1.100	RXN1G-163
2.3.1.41	RXN1G-218
2.5.1.74	RXN-9365
2.3.1.47	RXN-11484
3.6.1.19	RXN0-384
1.4.3.21	AMACETOXID-RXN
3.2.2.23	RXN0-2602
2.6.1.52	PSERTRANSAM-RXN
3.2.2.27	RXN0-2584
5.3.1.23	5.3.1.23-RXN
6.3.2.1	PANTOATE-BETA-ALANINE-LIG-RXN
2.3.1.15	RXN-10462
2.7.2.3	PHOSGLYPHOS-RXN
1.14.13.11	TRANS-CINNAMATE-4-MONOOXYGENASE-RXN
2.1.1.64	RXN-9229
1.17.4.2	RXN0-746
3.1.3.3	RXN0-5114
1.1.1.170	RXN66-23
2.1.1.163	RXN-9366
1.2.1.3	R222-RXN
2.1.1.64	RXN3O-102
5.3.1.5	XYLISOM-RXN
1.5.1.5	METHYLENETHFDEHYDROG-NADP-RXN
1.1.1.100	RXN-10659
2.5.1.74	RXN-9204
1.8.1.7	GLUTATHIONE-REDUCT-NADPH-RXN
2.7.1.151	RXN-10948
2.3.1.119	RXN-11676
2.3.1.16	RXN-10699
3.1.3.56	3.1.3.56-RXN
2.1.1.114	RXN-11757
2.7.4.6	GDPKIN-RXN
1.2.1.44	RXN-1106
1.3.1.72	1.3.1.72-RXN
3.4.19.12	3.4.19.12-RXN
1.1.2.4	D-LACTATE-DEHYDROGENASE-CYTOCHROME-RXN
1.3.1.72	RXN66-321
2.4.2.17	ATPPHOSPHORIBOSYLTRANS-RXN
3.1.1.1	RXN-10711
1.1.1.170	RXN66-318
1.2.1.27	RXN-11213
2.1.1.163	RXN-9363
1.17.4.1	GDPREDUCT-RXN
4.1.1.23	OROTPDECARB-RXN
2.3.1.51	RXN-1623
1.3.1.72	RXN66-10
1.14.13.70	RXN66-303
3.5.4.9	METHENYLTHFCYCLOHYDRO-RXN
3.1.3.37	chl_SBPase
1.17.4.1	RXN0-722
2.5.1.74	RXN-11047
4.3.2.1	RXN-22
3.5.2.2	RXN-11217
2.7.1.35	PYRAMKIN-RXN
1.14.11.19	1.14.11.19-RXN
1.11.1.6	RXN-3521
1.5.1.20	1.5.1.20-RXN
2.3.1.181	RXN0-947
1.3.5.2	DIHYDROOROTATE-DEHYDROGENASE-RXN
2.7.1.35	PYRIDOXKIN-RXN
2.1.1.114	RXN-9281
2.3.1.119	RXN-11675
3.5.4.19	HISTCYCLOHYD-RXN
2.7.1.151	RXN-7184
2.7.7.15	2.7.7.15-RXN
1.1.1.170	RXN66-313
2.3.1.9	METHYLACETOACETYLCOATHIOL-RXN
1.8.1.7	per_GLUTATHIONE-REDUCT-NADH-RXN
2.7.11.25	2.7.11.25-RXN
3.1.2.4	RXN-6384
5.3.3.8	RXN-7836
1.1.1.100	RXN1G-182
1.1.1.35	RXN-10703
1.2.4.4	1.2.4.4-RXN
1.7.1.1	chl_NITRATEREDUCTASENADHRXN
3.1.3.5	RXN-7607
4.2.1.9	DIHYDROXYMETVALDEHYDRAT-RXN
2.3.1.41	RXN-9527
2.4.1.227	RXN-11029
2.4.1.1	RXN-9025
5.3.3.5	RXN66-25
3.2.1.67	GALACTURAN-14-ALPHA-GALACTURONIDASE-RXN
1.1.1.234	FLAVANONE-4-REDUCTASE-RXN
2.7.1.50	THIAZOLSYN3-RXN
4.1.99.3	DEOXYRIBODIPYRIMIDINE-PHOTOLYASE-RXN
2.1.1.9	THIOL-S-METHYLTRANSFERASE-RXN
2.1.1.114	RXN-9280
1.2.1.3	GLYCERALDEHYDE-DEHYDRO-RXN
1.11.1.11	per_RXN-3523
1.14.13.70	RXN66-13
1.2.1.3	RXN-11619
5.4.99.18	RXN0-743
2.5.1.74	RXN-9359
4.2.1.104	RXN0-5222
5.4.99.18	5.4.99.18-RXN
1.1.1.94	GLYC3PDEHYDROGBIOSYN-RXN
1.8.1.2	SULFITE-REDUCT-RXN
2.5.1.39	2.5.1.39-RXN
1.13.11.53	R146-RXN
1.2.4.4	METHYLVALERATE-RXN
2.5.1.39	RXN-9003
1.2.4.4	KETOISOCAPROATE-RXN
4.1.1.49	PEPCARBOXYKIN-RXN
4.2.1.96	RXN-7908
3.1.3.25	MYO-INOSITOL-1OR-4-MONOPHOSPHATASE-RXN
4.1.1.17	ORNDECARBOX-RXN
1.1.3.15	RXN0-5364
2.5.1.39	RXN-11368
3.6.3.41	3.6.3.41-RXN
1.1.1.86	ACETOOHBUTREDUCTOISOM-RXN
2.3.1.41	RXN-10654
1.1.1.170	RXN66-18
1.2.1.3	RXN-3443
2.5.1.74	RXN-9360
5.3.3.8	ENOYL-COA-DELTA-ISOM-RXN
5.1.3.15	GLUCOSE-6-PHOSPHATE-1-EPIMERASE-RXN
1.3.5.2	RXN0-6554
2.6.1.52	PSERTRANSAMPYR-RXN
1.14.13.70	RXN66-305
3.6.1.13	RXN0-1441
2.7.7.63	RXN-8655
2.7.11.17	2.7.11.17-RXN
3.5.2.9	5-OXOPROLINASE-ATP-HYDROLYSING-RXN
1.3.1.38	RXN-7711
1.5.3.14	RXN-6421
1.2.1.27	RXN-11212
2.3.1.16	RXN-11246
1.4.3.21	RXN-11784
1.11.1.11	L-ASCORBATE-PEROXIDASE-RXN
2.5.1.31	RXN-8999
1.1.1.170	1.1.1.170-RXN
2.3.1.16	RXN-10701
1.14.11.9	RXN-7775
1.14.13.70	RXN66-304
1.14.21.6	1.14.21.6-RXN
2.1.1.98	RXN-11370
3.1.3.2	RXNQT-4191
2.7.1.29	GLYCERONE-KINASE-RXN
2.5.1.62	RXN1F-66
2.7.1.59	N-ACETYLGLUCOSAMINE-KINASE-RXN
1.14.11.9	RXN-7648
1.14.21.6	RXN66-26
3.2.1.52	RXN-11622
4.2.1.33	RXN-8991
4.2.3.3	METHGLYSYN-RXN
1.1.1.59	3-HYDROXYPROPIONATE-DEHYDROGENASE-RXN
1.17.4.1	RIBONUCLEOSIDE-DIP-REDUCTII-RXN
6.2.1.17	PROPIONATE-COA-LIGASE
2.7.2.1	ACETATEKIN-RXN
1.4.3.16	L-ASPARTATE-OXID-RXN
1.11.1.1	NADH-PEROXIDASE-RXN
5.1.3.4	chl_X5Piso
5.3.1.6	chl_R5Piso
4.1.1.4	ACETOACETATE-DECARBOXYLASE-RXN
1.3.99.3	Acyl-Coa-Dehydrogenase
4.2.1.118	DHSHIKIMATE-DEHYDRO-RXN
2.5.1.22	SPERMINE-SYNTHASE-RXN
4.1.3.24	MALYL-COA-LYASE-RXN
4.2.1.54	LACTOYL-COA-DEHYDRATASE-RXN
3.1.3.18	chl_PG_rxn
2.4.1.1	chl_StPase
1.3.3.1	DIHYDROOROTOX-RXN
1.1.1.82	chl_MalDH
1.1.1.37	per_MALATEDEHRXN
4.2.1.92	ALLENE-OXIDE-SYNTHASE
5.3.99.6	ALLENE-OXIDE-CYCLASE
1.31.4.2	12-oxophytodienoate reductase
1.1.1.35	3-hydroxyacyl-CoA dehydrogenase

## Sheet: Sheet3
Reactions for which no EC numbers were found.
Reaction Name	Reaction	Pathway involved
RXN-1103	1/1 "NADPH" + 1/1 "COUMARATE" + 1/1 "OXYGEN-MOLECULE" -> 1/1 "CAFFEATE" + 1/1 "NADP"	coniferyl biosynthesis
FAD_reduction_RXN	1/1 "FAD" + 2/1 "PROTON" <> 1/1 "FADH2"	FAD/FMN synthesis
chl_PGlyM	1.0 PGA_str <> 1.0 PGA2_str
GMP-REDUCT-RXN	1/1 "AMMONIA" + 1/1 "NADP" + 1/1 "IMP" -> 1/1 "NADPH" + 1/1 "GMP"	GMP biosynthesis
ARP_SYN_RXN	1/1 "CPD-1086" -> 1/1 "ARP"	FAD/FMN synthesis
chl_PyrNADPH	1.0 NADPH_str + 1.0 PYR_str + 1.0 CO2_str -> 1.0 NADP_str + 1.0 MAL_str
DIMETHYL-D-RIBITYL-LUMAZINE-SYN	1/1 "ARP" + 1/1 "DIHYDROXY-BUTANONE-P" -> 1/1 "DIMETHYL-D-RIBITYL-LUMAZINE"	FAD/FMN synthesis
LACCOA-RXN	1/1 "PROPIONYL-COA" + 1/1 "D-LACTATE" -> 1/1 "D-LACTOYL-COA" + 1/1 "PROPIONATE"	cysteine synthesis
RXN-7800	1/1 "CPD-7100" <> 1/1 "2K-4CH3-PENTANOATE" + 1/1 "CARBON-DIOXIDE"	leucine biosynthesis
UMPKI-RXN	1/1 "UMP" + 1/1 "ATP" <> 1/1 "UDP" + 1/1 "ADP"	CMP biosynthesis
RXN-1101	1/1 "NADPH" + 1/1 "COUMAROYL-COA" -> 1/1 "COUMARALDEHYDE" + 1/1 "NADP" + 1/1 "CO-A"	coumaryl biosynthesis
chl_LightNonCyc	4.5 ADP_str + 3.5 NADP_str + 14.0 Photon + 4.5 Pi_str -> 4.5 ATP_str + 3.5 NADPH_str + 1.75 O2_str	photophosphorylation
SPONTPRO-RXN	1/1 "L-GLUTAMATE_GAMMA-SEMIALDEHYDE" <> 1/1 "l-delta(1)-pyrroline_5-carboxylate"	Proline biosynthesis
SO3OXTFER-RXN	2/1 "Cytochromes-C-Reduced" + 1/1 "SULFATE" -> 1/1 "SO3" + 2/1 "Cytochromes-C"	methionine synthesis
chl_LightCyc	6.0 ADP_str + 14.0 Photon + 6.0 Pi_str -> 6.0 ATP_str	photophosphorylation
FA_Synth	16 "NADPH" + 9 "ACETYL-COA" + 8 "ATP" -> 9 "CO-A" + 16 "NADP" + 8 "Pi" + 1 "LINOLEIC_ACID" + 8 "ADP"
ISOJASMONATE-RXN	1/1 "3-oxo-2-(cis-2'-pentenyl)-cyclopentane-1-octanoate" + 3/1 "OXYGEN-MOLECULE" -> 1/1 "7-isojasmonate" + 3/1 "ACET"	JAsynthesis pathway
JASMONATE-SYN-RXN	1/1 "7-isojasmonate" -> 1/1 "Jasmonate"	JAsynthesis pathway
