# Supplementary material for: Reconstruction of Oryza sativa indica Genome Scale Metabolic Model and Its Responses to Varying RuBisCO Activity, Light Intensity, and Enzymatic Cost Conditions
Source: Front Plant Sci. 2017 Nov 30;8:2060. doi: 10.3389/fpls.2017.02060 (PMC5715477; doi:10.3389/fpls.2017.02060)
Supplement: Supplementary file 6 [file Data_Sheet_4.XLSX]

## Sheet: Sheet1
EC No.	Reaction Name	Reaction	ENZYME NAME (Source: Uniprot/Brenda)	PATHWAY (Source: Uniprot/Brenda)	REFERENCE
6.3.2.19	UBIQUITIN--PROTEIN-LIGASE-RXN	1.0 Ubiquitins + 1.0 Protein-L-lysine + 1.0 ATP -> 1.0 AMP + 1.0 PPI + 1.0 PROTEIN-N-UBIQUITYL-LYSINE	E3 ubiquitin-protein ligase PUB23	protein ubiquitination	Trujillo, M., Ichimura, K., Casais, C. and Shirasu, K., 2008. Negative regulation of PAMP-triggered immunity by an E3 ubiquitin ligase triplet in Arabidopsis. Current Biology, 18(18), pp.1396-1401.
3.6.1.15	NUCLEOSIDE-TRIPHOSPHATASE-RXN	1.0 Nucleoside-Triphosphates -> 1.0 Pi + 1.0 Nucleoside-Diphosphates	nucleoside-triphosphate phosphatase	pyrimidine deoxyribonucleotides de novo biosynthesis I	Chen, Yuh-Ru, and Stanley J. Roux. "Characterization of nucleoside triphosphatase activity in isolated pea nuclei and its photoreversible regulation by light." Plant physiology 81.2 (1986): 609-613.
3.6.1.15	ADENOSINETRIPHOSPHATASE-RXN	1.0 ATP -> 1.0 Pi + 1.0 ADP	nucleoside-triphosphate phosphatase	pyrimidine deoxyribonucleotides de novo biosynthesis I	Chen, Yuh-Ru, and Stanley J. Roux. "Characterization of nucleoside triphosphatase activity in isolated pea nuclei and its photoreversible regulation by light." Plant physiology 81.2 (1986): 609-613.
3.1.1.11	PECTINESTERASE-RXN	1.0 Pectin -> 1.0 METOH + 1.0 PECTATE	Pectinesterase	pectin degradation	Pelloux, Jérôme, Christine Rusterucci, and Ewa J. Mellerowicz. "New insights into pectin methylesterase structure and function." Trends in plant science 12.6 (2007): 267-277.
3.1.1.11	RXN-2102	1.0 Methylesterified-homogalacturonan -> 1.0 1-4-alpha-D-galacturonosyl + 1.0 METOH	Pectinesterase	pectin degradation	Pelloux, Jérôme, Christine Rusterucci, and Ewa J. Mellerowicz. "New insights into pectin methylesterase structure and function." Trends in plant science 12.6 (2007): 267-277.
1.5.5.1	1.5.5.1-RXN	1.0 Ubiquinones + 1.0 ETF-REDUCED -> 1.0 Ubiquinols + 1.0 ETF-OXIDIZED	Electron transfer flavoprotein-ubiquinone oxidoreductase	oxidative phosphorylation	Araújo, Wagner L., et al. "Identification of the 2-hydroxyglutarate and isovaleryl-CoA dehydrogenases as alternative electron donors linking lysine catabolism to the electron transport chain of Arabidopsis mitochondria." The Plant Cell 22.5 (2010): 1549-1563.
2.7.1.107	DIACYLGLYKIN-RXN	1.0 DIACYLGLYCEROL + 1.0 ATP <> 1.0 L-PHOSPHATIDATE + 1.0 ADP	Diacylglycerol kinase	Glycerophospholipid metabolism	Zhang, Weidong, et al. "Overexpression of a rice diacylglycerol kinase gene OsBIDK1 enhances disease resistance in transgenic tobacco." Molecules & Cells (Springer Science & Business Media BV) 26.3 (2008).
3.1.4.4	PHOSCHOL-RXN	1.0 PHOSPHATIDYLCHOLINE -> 1.0 L-PHOSPHATIDATE + 1.0 CHOLINE	phospholipase D	Glycerophospholipid metabolism	Shen, Peng, et al. "Rice Phospholipase Dα is Involved in Salt Tolerance by the Mediation of H+‐ATPase Activity and Transcription." Journal of integrative plant biology 53.4 (2011): 289-299.
1.11.1.7	PEROXID-RXN	1.0 HYDROGEN-PEROXIDE + 1.0 Phenolic-Donors -> 2.0 Phenoxyl-rad-of-phenolic-donors	peroxidase	betanidin degradation	Cosio, Claudia, and Christophe Dunand. "Specific functions of individual class III peroxidase genes." Journal of experimental botany 60.2 (2009): 391-408.
1.11.1.7	RXN66-11	1.0 NADPH + 1.0 CPD-8606 + 1.0 OXYGEN-MOLECULE -> 1.0 CPD-8607 + 1.0 NADP	peroxidase	betanidin degradation	Cosio, Claudia, and Christophe Dunand. "Specific functions of individual class III peroxidase genes." Journal of experimental botany 60.2 (2009): 391-408.
3.1.1.4	RXN-1501	1.0 PHOSPHATIDYLCHOLINE -> 1.0 LINOLENIC_ACID + 1.0 1-Acylglycero-Phosphocholines	Phospholipase A2	jasmonic acid biosynthesis	Ståhl, Ulf, et al. "Plant low-molecular-weight phospholipase A2s (PLA2s) are structurally related to the animal secretory PLA2s and are present as a family of isoforms in rice (Oryza sativa)." Plant molecular biology 41.4 (1999): 481-490.
3.1.1.4	PHOSPHOLIPASE-A2-RXN	1.0 PHOSPHATIDYLCHOLINE -> 1.0 Carboxylates + 1.0 1-Acylglycero-Phosphocholines	Phospholipase A2	jasmonic acid biosynthesis	Ståhl, Ulf, et al. "Plant low-molecular-weight phospholipase A2s (PLA2s) are structurally related to the animal secretory PLA2s and are present as a family of isoforms in rice (Oryza sativa)." Plant molecular biology 41.4 (1999): 481-490.
3.1.3.2	ACID-PHOSPHATASE-RXN	1.0 Orthophosphoric-Monoesters <> 1.0 Pi + 1.0 Alcohols	Purple acid phosphatase	NAD/NADH phosphorylation and dephosphorylation	Zhang, Q., et al. "Identification of rice purple acid phosphatases related to posphate starvation signalling." Plant Biology 13.1 (2011): 7-15.
3.1.3.2	RXN-5822	1.0 NADP -> 1.0 Pi + 1.0 NAD	Purple acid phosphatase	NAD/NADH phosphorylation and dephosphorylation	Zhang, Q., et al. "Identification of rice purple acid phosphatases related to posphate starvation signalling." Plant Biology 13.1 (2011): 7-15.
3.1.3.2	RXNQT-4191	1.0 THIAMINE-P -> 1.0 THIAMINE + 1.0 Pi	Purple acid phosphatase	NAD/NADH phosphorylation and dephosphorylation	Zhang, Q., et al. "Identification of rice purple acid phosphatases related to posphate starvation signalling." Plant Biology 13.1 (2011): 7-15.
4.1.3.1	ISOCIT-CLEAV-RXN	1.0 THREO-DS-ISO-CITRATE <> 1.0 SUC + 1.0 GLYOX	isocitrate lyase	glyoxylate cycle	Lu, Ying, Yong-Rui Wu, and Bin Han. "Anaerobic induction of isocitrate lyase and malate synthase in submerged rice seedlings indicates the important metabolic role of the glyoxylate cycle." Acta biochimica et biophysica Sinica 37.6 (2005): 406-414.
1.10.99.1 (shifted to 1.10.9.1)	PLASTOQUINOL--PLASTOCYANIN-REDUCTASE-RXN	1.0 PLASTOQUINOL-1 + 2.0 Oxidized-Plastocyanins -> 1.0 PLASTOQUINONE + 2.0 Plastocyanin-Reduced	plastoquinol-plastocyanin reductase (petC)	electron transfer between photosystem II (PSII) and photosystem I (PSI)	Essemine, Jemaa, et al. "Cyclic electron flow may provide some protection against PSII photoinhibition in rice (Oryza sativa L.) leaves under heat stress." Journal of Plant Physiology 211 (2017): 138-146.
3.2.1.52	3.2.1.52-RXN	1.0 N-Acetyl-D-Hexosaminides -> 1.0 RH + 1.0 N-acetyl-D-hexosamines	Beta-hexosaminidase	Various types of N-glycan biosynthesis	Strasser, Richard, et al. "Enzymatic properties and subcellular localization of Arabidopsis β-N-acetylhexosaminidases." Plant physiology 145.1 (2007): 5-16.
3.2.1.52	RXN0-5226	1.0 CPD0-1081 -> 1.0 N-ACETYL-D-GLUCOSAMINE + 1.0 CPD0-882	Beta-hexosaminidase	Various types of N-glycan biosynthesis	Strasser, Richard, et al. "Enzymatic properties and subcellular localization of Arabidopsis β-N-acetylhexosaminidases." Plant physiology 145.1 (2007): 5-16.
3.2.1.52	RXN-11622	1.0 N-ACETYL-D-GALACTOSALAMINYL-R -> 1.0 Glycans + 1.0 CPD-12557	Beta-hexosaminidase	Various types of N-glycan biosynthesis	Strasser, Richard, et al. "Enzymatic properties and subcellular localization of Arabidopsis β-N-acetylhexosaminidases." Plant physiology 145.1 (2007): 5-16.
1.11.1.15	1.11.1.15-RXN	2.0 PROT-CYS + 1.0 Alkyl-Hydro-Peroxides -> 1.0 Protein-Disulfides + 1.0 Alcohols	2-Cys peroxiredoxin BAS1	Glutathione metabolism	Pérez-Ruiz, Juan Manuel, et al. "Rice NTRC is a high-efficiency redox system for chloroplast protection against oxidative damage." The Plant Cell 18.9 (2006): 2356-2368.
1.11.1.15	RXN0-5468	1.0 Red-Thioredoxin + 1.0 Alkyl-Hydro-Peroxides <> 1.0 Alcohols + 1.0 Ox-Thioredoxin	2-Cys peroxiredoxin BAS1	Glutathione metabolism	Pérez-Ruiz, Juan Manuel, et al. "Rice NTRC is a high-efficiency redox system for chloroplast protection against oxidative damage." The Plant Cell 18.9 (2006): 2356-2368.
1.3.3.6	ACYL-COA-OXIDASE-RXN	1.0 OXYGEN-MOLECULE + 1.0 ACYL-COA -> 1.0 TRANS-D2-ENOYL-COA + 1.0 HYDROGEN-PEROXIDE	Acyl-coenzyme A oxidase	fatty-acid beta-oxidation	Kim, Moon Chul, et al. "Expression of rice acyl-CoA oxidase isoenzymes in response to wounding." Journal of plant physiology 164.5 (2007): 665-668.
1.3.3.6	RXN-10707	1.0 OXYGEN-MOLECULE + 1.0 CPD-11525 -> 1.0 HYDROGEN-PEROXIDE + 1.0 CPD-11526	Acyl-coenzyme A oxidase	fatty-acid beta-oxidation	Kim, Moon Chul, et al. "Expression of rice acyl-CoA oxidase isoenzymes in response to wounding." Journal of plant physiology 164.5 (2007): 665-668.
1.3.3.6	RXN-10706	1.0 CPD-11521 + 1.0 OXYGEN-MOLECULE -> 1.0 CPD-11522 + 1.0 HYDROGEN-PEROXIDE	Acyl-coenzyme A oxidase	fatty-acid beta-oxidation	Kim, Moon Chul, et al. "Expression of rice acyl-CoA oxidase isoenzymes in response to wounding." Journal of plant physiology 164.5 (2007): 665-668.
1.3.3.6	RXN-10696	1.0 OXYGEN-MOLECULE + 1.0 CPD-11517 -> 1.0 CPD-11518 + 1.0 HYDROGEN-PEROXIDE	Acyl-coenzyme A oxidase	fatty-acid beta-oxidation	Kim, Moon Chul, et al. "Expression of rice acyl-CoA oxidase isoenzymes in response to wounding." Journal of plant physiology 164.5 (2007): 665-668.
4.2.2.2	4.2.2.2-RXN	1.0 PECTATE -> 1.0 CPD-11244	Pectate lyase	Pentose and glucuronate interconversions	Palusa, Saiprasad Goud, et al. "Organ‐specific, developmental, hormonal and stress regulation of expression of putative pectate lyase genes in Arabidopsis." New phytologist 174.3 (2007): 537-550.
3.6.1.7	ACYLPHOSPHATASE-RXN	1.0 Acyl-Phosphates -> 1.0 Pi + 1.0 Carboxylates	Acylphosphatase	Pyruvate metabolism	Koiwa, Hisashi, et al. "Arabidopsis C-terminal domain phosphatase-like 1 and 2 are essential Ser-5-specific C-terminal domain phosphatases." Proceedings of the National Academy of Sciences of the United States of America 101.40 (2004): 14539-14544.
3.1.3.16	3.1.3.16-RXN	1.0 General-Phos-Protein-Substrates -> 1.0 General-Protein-Substrates + 1.0 Pi	protein phosphatase 2C BIPP2C1	role in responses to biotic and abiotic stresses	Hu, Xuebo, Fengming Song, and Zhong Zheng. "Molecular characterization and expression analysis of a rice protein phosphatase 2C gene, OsBIPP2C1, and overexpression in transgenic tobacco conferred enhanced disease resistance and abiotic tolerance." Physiologia Plantarum 127.2 (2006): 225-236.
2.4.1.18	GLYCOGEN-BRANCH-RXN	1.0 1-4-alpha-D-Glucan <> 1.0 6-alpha-D--1-4-alpha-D-Glucano--Glucan	1,4-alpha-glucan-branching enzyme 2-1	starch biosynthesis	Dumez, Sylvain, et al. "Mutants of Arabidopsis lacking starch branching enzyme II substitute plastidial starch synthesis by cytoplasmic maltose accumulation." The Plant Cell 18.10 (2006): 2694-2709.
2.4.1.18	RXN-7669	1.0 POLY-GLUCOSYLATED-GLYCOGENINS -> 1.0 6-alpha-D--1-4-alpha-D-Glucano--Glucan	1,4-alpha-glucan-branching enzyme 2-1	starch biosynthesis	Dumez, Sylvain, et al. "Mutants of Arabidopsis lacking starch branching enzyme II substitute plastidial starch synthesis by cytoplasmic maltose accumulation." The Plant Cell 18.10 (2006): 2694-2709.
2.4.1.18	RXN-7710	1.0 1-4-alpha-D-Glucan -> 1.0 Starch	1,4-alpha-glucan-branching enzyme 2-1	starch biosynthesis	Dumez, Sylvain, et al. "Mutants of Arabidopsis lacking starch branching enzyme II substitute plastidial starch synthesis by cytoplasmic maltose accumulation." The Plant Cell 18.10 (2006): 2694-2709.
3.1.4.11	3.1.4.11-RXN	1.0 PHOSPHATIDYL-MYO-INOSITOL-45-BISPHOSPHA -> 1.0 DIACYLGLYCEROL + 1.0 INOSITOL-1-4-5-TRISPHOSPHATE	phosphoinositide phospholipase C	D-myo-inositol (1,4,5)-trisphosphate biosynthesis	Otterhag, Lotta, Marianne Sommarin, and Christophe Pical. "N‐terminal EF‐hand‐like domain is required for phosphoinositide‐specific phospholipase C activity in Arabidopsis thaliana." FEBS letters 497.2-3 (2001): 165-170.
1.1.5.3	GLYC3PDEHYDROG-RXN	1.0 UBIQUINONE-8 + 1.0 GLYCEROL-3P <> 1.0 DIHYDROXY-ACETONE-PHOSPHATE + 1.0 CPD-9956	Glycerol-3-phosphate dehydrogenase SDP6	glycerol degradation via glycerol kinase pathway	Shen, Wenyun, et al. "Identification of a mitochondrial glycerol‐3‐phosphate dehydrogenase from Arabidopsis thaliana: evidence for a mitochondrial glycerol‐3‐phosphate shuttle in plants." FEBS letters 536.1-3 (2003): 92-96.
2.1.2.9	METHIONYL-TRNA-FORMYLTRANSFERASE-RXN	1.0 L-methionyl-tRNAfmet + 1.0 10-FORMYL-THF -> 1.0 THF + 1.0 N-formyl-L-methionyl-tRNAfmet	methionyl-tRNA formyltransferase	Aminoacyl-tRNA biosynthesis	Keller, Elizabeth B., and Jonathan P. Leis. "N-Formylmethionyl-tRNAf of wheat chloroplasts. Its synthesis by a wheat transformylase." Biochemistry 10.5 (1971): 889-894.
4.3.1.24	PHENYLALANINE-AMMONIA-LYASE-RXN	1.0 PHE -> 1.0 CPD-674 + 1.0 AMMONIA	Phenylalanine ammonia-lyase	trans-cinnamate biosynthesis	MINAMI, Ei‐Ichi, et al. "Structure and some characterization of the gene for phenylalanine ammonia‐lyase from rice plants." The FEBS Journal 185.1 (1989): 19-25.
2.3.2.8	ARGINYLTRANSFERASE-RXN	1.0 General-Protein-Substrates + 1.0 Charged-ARG-tRNAs -> 1.0 ARG-tRNAs + 1.0 Protein-L-Arginines	Arginyl-tRNA--protein transferase 1	Arg/N-end rule pathway	Yoshida, Satoko, et al. "A delayed leaf senescence mutant is defective in arginyl‐tRNA: Protein arginyltransferase, a component of the N‐end rule pathway in Arabidopsis." The Plant Journal 32.1 (2002): 129-137.
1.6.2.2	CYTOCHROME-B5-REDUCTASE-RXN	1.0 NADH + 2.0 FERRICYTOCHROME-B5 -> 2.0 FERROCYTOCHROME-B5 + 1.0 NAD	cytochrome-b5 reductase	Amino sugar and nucleotide sugar metabolism	Wayne, Laura L., et al. "Cytochrome b5 reductase encoded by CBR1 is essential for a functional male gametophyte in Arabidopsis." The Plant Cell 25.8 (2013): 3052-3066.
1.6.2.2	RXN-11195	2.0 Ferrihemoglobins + 1.0 NADH -> 2.0 Ferrohemoglobins + 1.0 NAD	cytochrome-b5 reductase	Amino sugar and nucleotide sugar metabolism	Wayne, Laura L., et al. "Cytochrome b5 reductase encoded by CBR1 is essential for a functional male gametophyte in Arabidopsis." The Plant Cell 25.8 (2013): 3052-3066.
2.3.1.129	UDPNACETYLGLUCOSAMACYLTRANS-RXN	1.0 UDP-N-ACETYL-D-GLUCOSAMINE + 1.0 R-3-hydroxymyristoyl-ACPs <> 1.0 UDP-OHMYR-ACETYLGLUCOSAMINE + 1.0 ACP	acyl-[acyl-carrier-protein]-UDP-N-acetylglucosamine O-acyltransferase	lipid IV(A) biosynthesis	Activity and crystal structure of Arabidopsis thaliana UDP-N-acetylglucosamine acyltransferase
4.1.1.65	PHOSPHASERDECARB-RXN	1.0 L-1-PHOSPHATIDYL-SERINE -> 1.0 L-1-PHOSPHATIDYL-ETHANOLAMINE + 1.0 CARBON-DIOXIDE	Phosphatidylserine decarboxylase proenzyme 2	phosphatidylethanolamine biosynthesis	Rontein, Denis, et al. "Mitochondrial phosphatidylserine decarboxylase from higher plants. Functional complementation in yeast, localization in plants, and overexpression in Arabidopsis." Plant physiology 132.3 (2003): 1678-1687.
2.3.3.9	MALSYN-RXN	1.0 GLYOX + 1.0 ACETYL-COA -> 1.0 CO-A + 1.0 MAL	Malate synthase	glyoxylate cycle	Lu, Ying, Yong-Rui Wu, and Bin Han. "Anaerobic induction of isocitrate lyase and malate synthase in submerged rice seedlings indicates the important metabolic role of the glyoxylate cycle." ACTA BIOCHIMICA ET BIOPHYSICA SINICA-CHINESE EDITION- 37.6 (2005): 406.
3.6.3.4	3.6.3.4-RXN	1.0 CU+2_in + 1.0 ATP -> 1.0 Pi + 1.0 CU+2_out + 1.0 ADP	Copper-transporting ATPase PAA	copper ion transport	Abdel-Ghany, Salah E., et al. "Two P-type ATPases are required for copper delivery in Arabidopsis thaliana chloroplasts." The Plant Cell 17.4 (2005): 1233-1251.
2.3.1.41	3-OXOACYL-ACP-SYNTH-BASE-RXN	1.0 MALONYL-ACP + 1.0 ACETYL-ACP -> 1.0 ACP + 1.0 Acetoacetyl-ACPs + 1.0 CARBON-DIOXIDE	3-oxoacyl-[acyl-carrier-protein] synthase II	Fatty acid biosynthesis	Hakozaki, Hirokazu, et al. "Expression and developmental function of the 3-ketoacyl-ACP synthase2 gene in Arabidopsis thaliana." Genes & genetic systems 83.2 (2008): 143-152.
2.3.1.41	3-OXOACYL-ACP-SYNTH-RXN	1.0 MALONYL-ACP + 1.0 Saturated-Fatty-Acyl-ACPs -> 1.0 ACP + 1.0 B-KETOACYL-ACP + 1.0 CARBON-DIOXIDE	3-oxoacyl-[acyl-carrier-protein] synthase II	Fatty acid biosynthesis	Hakozaki, Hirokazu, et al. "Expression and developmental function of the 3-ketoacyl-ACP synthase2 gene in Arabidopsis thaliana." Genes & genetic systems 83.2 (2008): 143-152.
2.3.1.41	RXN-11479	1.0 Glutaryl-ACP-methyl-esters + 1.0 MALONYL-ACP -> 1.0 ACP + 1.0 3-Ketopimeloyl-ACP-methyl-esters + 1.0 CARBON-DIOXIDE	3-oxoacyl-[acyl-carrier-protein] synthase II	Fatty acid biosynthesis	Hakozaki, Hirokazu, et al. "Expression and developmental function of the 3-ketoacyl-ACP synthase2 gene in Arabidopsis thaliana." Genes & genetic systems 83.2 (2008): 143-152.
2.3.1.41	RXN-10658	1.0 Cis-Delta7-tetradecenoyl-ACPs + 1.0 MALONYL-ACP -> 1.0 ACP + 1.0 3-oxo-cis-D9-hexadecenoyl-ACPs + 1.0 CARBON-DIOXIDE	3-oxoacyl-[acyl-carrier-protein] synthase II	Fatty acid biosynthesis	Hakozaki, Hirokazu, et al. "Expression and developmental function of the 3-ketoacyl-ACP synthase2 gene in Arabidopsis thaliana." Genes & genetic systems 83.2 (2008): 143-152.
2.3.1.41	RXN-9516	1.0 MALONYL-ACP + 1.0 Butanoyl-ACPs -> 1.0 ACP + 1.0 3-oxo-hexanoyl-ACPs + 1.0 CARBON-DIOXIDE	3-oxoacyl-[acyl-carrier-protein] synthase II	Fatty acid biosynthesis	Hakozaki, Hirokazu, et al. "Expression and developmental function of the 3-ketoacyl-ACP synthase2 gene in Arabidopsis thaliana." Genes & genetic systems 83.2 (2008): 143-152.
2.3.1.41	RXN1G-1003	1.0 cis-delta17-C36-ACPs + 1.0 MALONYL-ACP -> 1.0 cis-delta19-3-oxo-C38-ACPs + 1.0 Holo-ACP-Synthases + 1.0 CARBON-DIOXIDE	3-oxoacyl-[acyl-carrier-protein] synthase II	Fatty acid biosynthesis	Hakozaki, Hirokazu, et al. "Expression and developmental function of the 3-ketoacyl-ACP synthase2 gene in Arabidopsis thaliana." Genes & genetic systems 83.2 (2008): 143-152.
2.3.1.41	RXN-9523	1.0 MALONYL-ACP + 1.0 Hexanoyl-ACPs -> 1.0 3-Oxo-octanoyl-ACPs + 1.0 ACP + 1.0 CARBON-DIOXIDE	3-oxoacyl-[acyl-carrier-protein] synthase II	Fatty acid biosynthesis	Hakozaki, Hirokazu, et al. "Expression and developmental function of the 3-ketoacyl-ACP synthase2 gene in Arabidopsis thaliana." Genes & genetic systems 83.2 (2008): 143-152.
2.3.1.41	RXN1G-460	1.0 CPD1G-567 + 1.0 MALONYL-ACP -> 1.0 CO-A + 1.0 3-oxo-behenoyl-ACPs + 1.0 CARBON-DIOXIDE	3-oxoacyl-[acyl-carrier-protein] synthase II	Fatty acid biosynthesis	Hakozaki, Hirokazu, et al. "Expression and developmental function of the 3-ketoacyl-ACP synthase2 gene in Arabidopsis thaliana." Genes & genetic systems 83.2 (2008): 143-152.
2.3.1.41	RXN-9535	1.0 Dodecanoyl-ACPs + 1.0 MALONYL-ACP -> 1.0 ACP + 1.0 CARBON-DIOXIDE + 1.0 3-oxo-myristoyl-ACPs	3-oxoacyl-[acyl-carrier-protein] synthase II	Fatty acid biosynthesis	Hakozaki, Hirokazu, et al. "Expression and developmental function of the 3-ketoacyl-ACP synthase2 gene in Arabidopsis thaliana." Genes & genetic systems 83.2 (2008): 143-152.
2.3.1.41	RXN-9539	1.0 Myristoyl-ACPs + 1.0 MALONYL-ACP -> 1.0 ACP + 1.0 3-oxo-palmitoyl-ACPs + 1.0 CARBON-DIOXIDE	3-oxoacyl-[acyl-carrier-protein] synthase II	Fatty acid biosynthesis	Hakozaki, Hirokazu, et al. "Expression and developmental function of the 3-ketoacyl-ACP synthase2 gene in Arabidopsis thaliana." Genes & genetic systems 83.2 (2008): 143-152.
2.3.1.41	2.3.1.41-RXN	1.0 ACYL-ACP + 1.0 MALONYL-ACP -> 1.0 ACP + 1.0 B-KETOACYL-ACP + 1.0 CARBON-DIOXIDE	3-oxoacyl-[acyl-carrier-protein] synthase II	Fatty acid biosynthesis	Hakozaki, Hirokazu, et al. "Expression and developmental function of the 3-ketoacyl-ACP synthase2 gene in Arabidopsis thaliana." Genes & genetic systems 83.2 (2008): 143-152.
2.3.1.41	RXN-9531	1.0 MALONYL-ACP + 1.0 Decanoyl-ACPs -> 1.0 3-oxo-dodecanoyl-ACPs + 1.0 ACP + 1.0 CARBON-DIOXIDE	3-oxoacyl-[acyl-carrier-protein] synthase II	Fatty acid biosynthesis	Hakozaki, Hirokazu, et al. "Expression and developmental function of the 3-ketoacyl-ACP synthase2 gene in Arabidopsis thaliana." Genes & genetic systems 83.2 (2008): 143-152.
2.3.1.41	RXN1G-138	1.0 MALONYL-ACP + 1.0 cis-delta9-montanoyl-ACPs -> 1.0 cis-delta11-3-oxo-melissoyl-ACPs + 1.0 Holo-ACP-Synthases + 1.0 CARBON-DIOXIDE	3-oxoacyl-[acyl-carrier-protein] synthase II	Fatty acid biosynthesis	Hakozaki, Hirokazu, et al. "Expression and developmental function of the 3-ketoacyl-ACP synthase2 gene in Arabidopsis thaliana." Genes & genetic systems 83.2 (2008): 143-152.
2.3.1.41	RXN1G-132	1.0 cis-delta19-C38-ACPs + 1.0 MALONYL-ACP -> 1.0 Holo-ACP-Synthases + 1.0 cis-delta21-3-oxo-C40-ACPs + 1.0 CARBON-DIOXIDE	3-oxoacyl-[acyl-carrier-protein] synthase II	Fatty acid biosynthesis	Hakozaki, Hirokazu, et al. "Expression and developmental function of the 3-ketoacyl-ACP synthase2 gene in Arabidopsis thaliana." Genes & genetic systems 83.2 (2008): 143-152.
2.3.1.41	RXN1G-324	1.0 cis-delta13-lacceroyl-ACPs + 1.0 MALONYL-ACP -> 1.0 Holo-ACP-Synthases + 1.0 CARBON-DIOXIDE + 1.0 cis-delta15-3-oxo-gheddoyl-ACPs	3-oxoacyl-[acyl-carrier-protein] synthase II	Fatty acid biosynthesis	Hakozaki, Hirokazu, et al. "Expression and developmental function of the 3-ketoacyl-ACP synthase2 gene in Arabidopsis thaliana." Genes & genetic systems 83.2 (2008): 143-152.
2.3.1.41	RXN1G-306	1.0 MALONYL-ACP + 1.0 cis-delta5-lignoceroyl-ACPs -> 1.0 Holo-ACP-Synthases + 1.0 cis-delta7-3-oxo-cerotoyl-ACPs + 1.0 CARBON-DIOXIDE	3-oxoacyl-[acyl-carrier-protein] synthase II	Fatty acid biosynthesis	Hakozaki, Hirokazu, et al. "Expression and developmental function of the 3-ketoacyl-ACP synthase2 gene in Arabidopsis thaliana." Genes & genetic systems 83.2 (2008): 143-152.
2.3.1.41	RXN1G-236	1.0 cis-delta11-melissoyl-ACPs + 1.0 MALONYL-ACP -> 1.0 Holo-ACP-Synthases + 1.0 cis-delta13-3-oxo-lacceroyl-ACPs + 1.0 CARBON-DIOXIDE	3-oxoacyl-[acyl-carrier-protein] synthase II	Fatty acid biosynthesis	Hakozaki, Hirokazu, et al. "Expression and developmental function of the 3-ketoacyl-ACP synthase2 gene in Arabidopsis thaliana." Genes & genetic systems 83.2 (2008): 143-152.
2.3.1.41	RXN1G-26	1.0 MALONYL-ACP + 1.0 cis-delta3-behenoyl-ACPs -> 1.0 Holo-ACP-Synthases + 1.0 CARBON-DIOXIDE + 1.0 cis-delta5-3-oxo-lignoceroyl-ACPs	3-oxoacyl-[acyl-carrier-protein] synthase II	Fatty acid biosynthesis	Hakozaki, Hirokazu, et al. "Expression and developmental function of the 3-ketoacyl-ACP synthase2 gene in Arabidopsis thaliana." Genes & genetic systems 83.2 (2008): 143-152.
2.3.1.41	RXN1G-218	1.0 MALONYL-ACP + 1.0 cis-delta7-cerotoyl-ACPs -> 1.0 cis-delta9-3-oxo-montanoyl-ACPs + 1.0 Holo-ACP-Synthases + 1.0 CARBON-DIOXIDE	3-oxoacyl-[acyl-carrier-protein] synthase II	Fatty acid biosynthesis	Hakozaki, Hirokazu, et al. "Expression and developmental function of the 3-ketoacyl-ACP synthase2 gene in Arabidopsis thaliana." Genes & genetic systems 83.2 (2008): 143-152.
2.3.1.41	RXN-9527	1.0 MALONYL-ACP + 1.0 Octanoyl-ACPs -> 1.0 ACP + 1.0 CARBON-DIOXIDE + 1.0 3-oxo-decanoyl-ACPs	3-oxoacyl-[acyl-carrier-protein] synthase II	Fatty acid biosynthesis	Hakozaki, Hirokazu, et al. "Expression and developmental function of the 3-ketoacyl-ACP synthase2 gene in Arabidopsis thaliana." Genes & genetic systems 83.2 (2008): 143-152.
2.3.1.41	RXN-10654	1.0 Cis-Delta5-dodecenoyl-ACPs + 1.0 MALONYL-ACP -> 1.0 ACP + 1.0 CARBON-DIOXIDE + 1.0 3-oxo-cis-D7-tetradecenoyl-ACPs	3-oxoacyl-[acyl-carrier-protein] synthase II	Fatty acid biosynthesis	Hakozaki, Hirokazu, et al. "Expression and developmental function of the 3-ketoacyl-ACP synthase2 gene in Arabidopsis thaliana." Genes & genetic systems 83.2 (2008): 143-152.
2.7.7.41	CDPDIGLYSYN-RXN	1.0 L-PHOSPHATIDATE + 1.0 CTP -> 1.0 CDPDIACYLGLYCEROL + 1.0 PPI	CDP-diacylglycerol synthase	CDP-diacylglycerol biosynthesis	Haselier, André, et al. "Two closely related genes of Arabidopsis encode plastidial cytidinediphosphate diacylglycerol synthases essential for photoautotrophic growth." Plant physiology 153.3 (2010): 1372-1384.
2.7.7.41	RXN0-5515	1.0 2-3-4-Saturated-L-Phosphatidates + 1.0 CTP <> 1.0 CDP-2-3-4-Saturated-Diacylglycerols + 1.0 PPI	CDP-diacylglycerol synthase	CDP-diacylglycerol biosynthesis	Haselier, André, et al. "Two closely related genes of Arabidopsis encode plastidial cytidinediphosphate diacylglycerol synthases essential for photoautotrophic growth." Plant physiology 153.3 (2010): 1372-1384.
2.7.8.5	PHOSPHAGLYPSYN-RXN	1.0 CDPDIACYLGLYCEROL + 1.0 GLYCEROL-3P <> 1.0 L-1-PHOSPHATIDYL-GLYCEROL-P + 1.0 CMP	CDP-diacylglycerol--glycerol-3-phosphate 3-phosphatidyltransferase 1	phosphatidylglycerol biosynthesis	Babiychuk, Elena, et al. "Arabidopsis phosphatidylglycerophosphate synthase 1 is essential for chloroplast differentiation, but is dispensable for mitochondrial function." The Plant Journal 33.5 (2003): 899-909.
2.3.1.39	MALONYL-COA-ACP-TRANSACYL-RXN	1.0 MALONYL-COA + 1.0 ACP <> 1.0 CO-A + 1.0 MALONYL-ACP	S-malonyltransferase	Fatty acid biosynthesis	Guerra, Daniel J., and John B. Ohlrogge. "Partial purification and characterization of two forms of malonyl-coenzyme A: acyl carrier protein transacylase from soybean leaf tissue." Archives of biochemistry and biophysics 246.1 (1986): 274-285.
2.7.1.68	2.7.1.68-RXN	1.0 CPD-1108 + 1.0 ATP -> 1.0 PHOSPHATIDYL-MYO-INOSITOL-45-BISPHOSPHA + 1.0 ADP	phosphatidylinositol monophosphate kinase	Inositol phosphate metabolism	Ma, Hui, et al. "OsPIPK1, a rice phosphatidylinositol monophosphate kinase, regulates rice heading by modifying the expression of floral induction genes." Plant molecular biology 54.2 (2004): 295-310.
2.7.1.67	1-PHOSPHATIDYLINOSITOL-KINASE-RXN	1.0 L-1-phosphatidyl-inositols + 1.0 ATP -> 1.0 CPD-1108 + 1.0 ADP	1-phosphatidylinositol 4-kinase	Inositol phosphate metabolism	Delage, Elise, et al. "Arabidopsis type-III phosphatidylinositol 4-kinases β1 and β2 are upstream of the phospholipase C pathway triggered by cold exposure." Plant and Cell Physiology 53.3 (2012): 565-576.
2.7.8.11	2.7.8.11-RXN	1.0 CDPDIACYLGLYCEROL + 1.0 MYO-INOSITOL -> 1.0 L-1-phosphatidyl-inositols + 1.0 CMP	CDP-diacylglycerol—inositol 3-phosphatidyltransferase	Inositol phosphate metabolism	Collin, Sylvie, et al. "Identification of AtPIS, a phosphatidylinositol synthase from Arabidopsis." European journal of biochemistry 262.3 (1999): 652-658.
6.3.4.15	BIOTINLIG-RXN	1.0 BCCP-monomers + 1.0 ATP + 1.0 BIOTIN <> 1.0 AMP + 1.0 PPI + 1.0 BCCP-biotin-monomers	biotin—[acetyl-CoA-carboxylase] ligase	Biotin metabolism	TISSOT, Ghislaine, Roland DOUCE, and Claude ALBAN. "Evidence for multiple forms of biotin holocarboxylase synthetase in pea (Pisum sativum) and in Arabidopsis thaliana: subcellular fractionation studies and isolation of a cDNA clone." Biochemical Journal 323.1 (1997): 179-188.
4.2.1.119/4.2.1.17	RXN-6383	1.0 ACRYLYL-COA <> 1.0 3-HYDROXY-PROPIONYL-COA	3-hydroxyacyl-CoA dehydrogenase	fatty acid beta-oxidation	Chuong, Simon DX, Robert T. Mullen, and Douglas G. Muench. "Identification of a rice RNA-and microtubule-binding protein as the multifunctional protein, a peroxisomal enzyme involved in the β-oxidation of fatty acids." Journal of Biological Chemistry 277.4 (2002): 2419-2429.
4.2.1.119/4.2.1.17	RXN-7699	1.0 D-3-HYDROXYACYL-COA <> 1.0 TRANS-D2-ENOYL-COA	3-hydroxyacyl-CoA dehydrogenase	fatty acid beta-oxidation	Chuong, Simon DX, Robert T. Mullen, and Douglas G. Muench. "Identification of a rice RNA-and microtubule-binding protein as the multifunctional protein, a peroxisomal enzyme involved in the β-oxidation of fatty acids." Journal of Biological Chemistry 277.4 (2002): 2419-2429.
4.2.1.119/4.2.1.17	RXN-11750	1.0 Long-Chain-3-Hydroxyacyl-CoAs -> 1.0 Long-Chain-Trans-23-Dehydroacyl-CoA	3-hydroxyacyl-CoA dehydrogenase	fatty acid beta-oxidation	Chuong, Simon DX, Robert T. Mullen, and Douglas G. Muench. "Identification of a rice RNA-and microtubule-binding protein as the multifunctional protein, a peroxisomal enzyme involved in the β-oxidation of fatty acids." Journal of Biological Chemistry 277.4 (2002): 2419-2429.
2.4.1.198	2.4.1.198-RXN	1.0 UDP-N-ACETYL-D-GLUCOSAMINE + 1.0 L-1-phosphatidyl-inositols -> 1.0 UDP + 1.0 CPD-452	phosphatidylinositol N-acetylglucosaminyltransferase	glycosylphosphatidylinositol-anchor biosynthesis	Lalanne, Eric, et al. "SETH1 and SETH2, two components of the glycosylphosphatidylinositol anchor biosynthetic pathway, are required for pollen germination and tube growth in Arabidopsis." The Plant Cell 16.1 (2004): 229-240.
2.7.11.1	PROTEIN-KINASE-RXN	1.0 General-Protein-Substrates + 1.0 ATP -> 1.0 General-Phos-Protein-Substrates + 1.0 ADP	Serine/threonine-protein kinase-like protein CR4	ubiquinone biosynthetic process	Pu, Cui‐Xia, et al. "Crinkly4 receptor‐like kinase is required to maintain the interlocking of the palea and lemma, and fertility in rice, by promoting epidermal cell differentiation." The Plant Journal 70.6 (2012): 940-953.
2.3.1.51	1-ACYLGLYCEROL-3-P-ACYLTRANSFER-RXN	1.0 ACYL-ACP + 1.0 ACYL-SN-GLYCEROL-3P -> 1.0 L-PHOSPHATIDATE + 1.0 ACP	1-acyl-sn-glycerol-3-phosphate acyltransferase	CDP-diacylglycerol biosynthesis	Yu, Bin, et al. "Loss of plastidic lysophosphatidic acid acyltransferase causes embryo-lethality in Arabidopsis." Plant and cell physiology 45.5 (2004): 503-510.
2.3.1.51	RXN0-5514	1.0 Saturated-2-Lysophosphatidates + 1.0 Saturated-Fatty-Acyl-ACPs -> 1.0 2-3-4-Saturated-L-Phosphatidates + 1.0 ACP	1-acyl-sn-glycerol-3-phosphate acyltransferase	CDP-diacylglycerol biosynthesis	Yu, Bin, et al. "Loss of plastidic lysophosphatidic acid acyltransferase causes embryo-lethality in Arabidopsis." Plant and cell physiology 45.5 (2004): 503-510.
2.3.1.51	RXN-1623	1.0 Fatty-Acyl-CoA + 1.0 ACYL-SN-GLYCEROL-3P -> 1.0 CO-A + 1.0 L-PHOSPHATIDATE	1-acyl-sn-glycerol-3-phosphate acyltransferase	CDP-diacylglycerol biosynthesis	Yu, Bin, et al. "Loss of plastidic lysophosphatidic acid acyltransferase causes embryo-lethality in Arabidopsis." Plant and cell physiology 45.5 (2004): 503-510.
5.3.4.1	5.3.4.1-RXN	1.0 Proteins-with-incorrect-disulfides <> 1.0 Proteins-with-correct-disulfides	Protein disulfide isomerase-like 1-1	cell redox homeostasis	Satoh-Cruz, Mio, et al. "Protein disulfide isomerase like 1-1 participates in the maturation of proglutelin within the endoplasmic reticulum in rice endosperm." Plant and cell physiology 51.9 (2010): 1581-1593.
2.4.1.46	2.4.1.46-RXN	1.0 UDP-GALACTOSE + 1.0 DIACYLGLYCEROL -> 1.0 D-Galactosyl-12-diacyl-glycerols + 1.0 UDP	monogalactosyldiacylglycerol synthase 2	galactolipid biosynthesis I	Li, Chunlai, et al. "A rice plastidial nucleotide sugar epimerase is involved in galactolipid biosynthesis and improves photosynthetic efficiency." PLoS Genet 7.7 (2011): e1002196.
3.1.3.4	PHOSPHATIDATE-PHOSPHATASE-RXN	1.0 L-PHOSPHATIDATE -> 1.0 DIACYLGLYCEROL + 1.0 Pi	lipid phosphatidate phosphatase: LPP1	phospholipid metabolic process	Pierrugues, Olivier, et al. "Lipid phosphate phosphatases in Arabidopsis regulation of the AtLPP1 gene in response to stress." Journal of Biological Chemistry 276.23 (2001): 20300-20308.
3.1.1.1	CARBOXYLESTERASE-RXN	1.0 Carboxylic-esters -> 1.0 Alcohols + 1.0 Carboxylates	carboxylesterase	retinol biosynthesis	Vlot, Anna Corina, et al. "Identification of likely orthologs of tobacco salicylic acid‐binding protein 2 and their role in systemic acquired resistance in Arabidopsis thaliana." The Plant Journal 56.3 (2008): 445-456.
3.1.1.1	RXN-10767	1.0 Methyl-Jasmonates <> 1.0 Jasmonic-Acids + 1.0 METOH	carboxylesterase	retinol biosynthesis	Vlot, Anna Corina, et al. "Identification of likely orthologs of tobacco salicylic acid‐binding protein 2 and their role in systemic acquired resistance in Arabidopsis thaliana." The Plant Journal 56.3 (2008): 445-456.
3.1.1.1	RXNQT-4366	1.0 CPD-6442 -> 1.0 CPD-110 + 1.0 METOH	carboxylesterase	retinol biosynthesis	Vlot, Anna Corina, et al. "Identification of likely orthologs of tobacco salicylic acid‐binding protein 2 and their role in systemic acquired resistance in Arabidopsis thaliana." The Plant Journal 56.3 (2008): 445-456.
3.1.1.1	RXN-10711	1.0 CPD-10546 -> 1.0 INDOLE_ACETATE_AUXIN + 1.0 METOH	carboxylesterase	retinol biosynthesis	Vlot, Anna Corina, et al. "Identification of likely orthologs of tobacco salicylic acid‐binding protein 2 and their role in systemic acquired resistance in Arabidopsis thaliana." The Plant Journal 56.3 (2008): 445-456.
2.6.1.44	per_ALANINEGLYOXYLATEAMINOTRANSFERASERXN	1.0 per_GLYOX + 1.0 per_L-ALPHA-ALANINE -> 1.0 per_PYRUVATE + 1.0 per_GLY	Alanine--glyoxylate aminotransferase	glycine biosynthesis III	Kendziorek, Maria, and Andrzej Paszkowski. "Properties of serine: glyoxylate aminotransferase purified from Arabidopsis thaliana leaves." Acta biochimica et biophysica Sinica 40.2 (2008): 102-110.
2.3.2.15	2.3.2.15-RXN	1.0 GLUTATHIONE -> 1.0 GLY + 1.0 Poly-Gamma-Glutamylcysteine-Glycines	glutathione γ-glutamylcysteinyltransferase	phytochelatin biosynthetic process	Grill, Erwin, et al. "Phytochelatins, the heavy-metal-binding peptides of plants, are synthesized from glutathione by a specific γ-glutamylcysteine dipeptidyl transpeptidase (phytochelatin synthase)." Proceedings of the National Academy of Sciences 86.18 (1989): 6838-6842.
2.4.1.241	RXN-1225	1.0 UDP-GALACTOSE + 1.0 D-Galactosyl-12-diacyl-glycerols -> 1.0 UDP + 1.0 Galactosyl-galactosyl-diacyl-glycerols	digalactosyldiacylglycerol synthase	galactolipid biosynthesis	Ge, Changrong, et al. "Tryptophan residues promote membrane association for a plant lipid glycosyltransferase involved in phosphate stress." Journal of Biological Chemistry 286.8 (2011): 6669-6684.
2.5.1.58	2.5.1.58-RXN	1.0 FARNESYL-PP + 1.0 PROT-CYS -> 1.0 PPI + 1.0 S-FARNESYL-PROTEIN	protein farnesyltransferase	Terpenoid backbone biosynthesis	Manavalan, Lakshmi P., et al. "RNAi-mediated disruption of squalene synthase improves drought tolerance and yield in rice." Journal of experimental botany 63.1 (2012): 163-175.
2.1.1.107	UROPORIIIMETHYLTRANSA-RXN	1.0 UROPORPHYRINOGEN-III + 1.0 S-ADENOSYLMETHIONINE <> 1.0 CPD-9038 + 1.0 ADENOSYL-HOMO-CYS	uroporphyrinogen-III C-methyltransferase	siroheme biosynthetic process	Leustek, Thomas, et al. "Siroheme Biosynthesis in Higher Plants ANALYSIS OF AN S-ADENOSYL-L-METHIONINE-DEPENDENT UROPORPHYRINOGEN III METHYLTRANSFERASE FROM ARABIDOPSIS THALIANA." Journal of Biological Chemistry 272.5 (1997): 2744-2752.
2.1.1.107	RXN-8675	1.0 S-ADENOSYLMETHIONINE + 1.0 CPD-9038 -> 1.0 DIHYDROSIROHYDROCHLORIN + 1.0 ADENOSYL-HOMO-CYS	uroporphyrinogen-III C-methyltransferase	siroheme biosynthetic process	Leustek, Thomas, et al. "Siroheme Biosynthesis in Higher Plants ANALYSIS OF AN S-ADENOSYL-L-METHIONINE-DEPENDENT UROPORPHYRINOGEN III METHYLTRANSFERASE FROM ARABIDOPSIS THALIANA." Journal of Biological Chemistry 272.5 (1997): 2744-2752.
3.5.1.23	CERAMIDASE-YEAST-RXN	1.0 Phytoceramides -> 1.0 PHYTOSPINGOSINE + 1.0 Carboxylates	ceramidase	ceramide degradation	Pata, Mickael O., et al. "Molecular cloning and characterization of OsCDase, a ceramidase enzyme from rice." The Plant Journal 55.6 (2008): 1000-1009.
3.5.1.23	CERAMIDASE RXN	1.0 SPHINGOSINE CERAMIDES -> 1.0 SPHINGOSINE + 1.0 Carboxylates	ceramidase	ceramide degradation	Pata, Mickael O., et al. "Molecular cloning and characterization of OsCDase, a ceramidase enzyme from rice." The Plant Journal 55.6 (2008): 1000-1009.
3.5.1.23	RXN-11375	1.0 Ceramides -> 1.0 Sphingoids + 1.0 Fatty-Acids	ceramidase	ceramide degradation	Pata, Mickael O., et al. "Molecular cloning and characterization of OsCDase, a ceramidase enzyme from rice." The Plant Journal 55.6 (2008): 1000-1009.
2.7.7.50	MRNA-GUANYLYLTRANSFERASE-RXN	1.0 GTP + 1.0 CPD-8630 -> 1.0 PPI + 1.0 CPD-8631	mRNA guanylyltransferase	mRNA capping I	Keith, Jerry M., et al. "Purification and characterization of the mRNA capping enzyme GTP: RNA guanylyltransferase from wheat germ." Biochemistry 21.2 (1982): 327-333.
2.1.1.37	2.1.1.73-RXN	1.0 DNA-Cytosines + 1.0 S-ADENOSYLMETHIONINE -> 1.0 DNA-5-Methyl-Cytosines + 1.0 ADENOSYL-HOMO-CYS	DNA (cytosine-5-)-methyltransferase	maintenance of DNA methylation	Kawahara, Yoshihiro, et al. "Improvement of the Oryza sativa Nipponbare reference genome using next generation sequence and optical map data." Rice 6.1 (2013): 4.
2.1.1.37	DNA-CYTOSINE-5--METHYLTRANSFERASE-RXN	1.0 DNAs + 1.0 S-ADENOSYLMETHIONINE <> 1.0 5-Methylcytosine-DNA + 1.0 ADENOSYL-HOMO-CYS	DNA (cytosine-5-)-methyltransferase	maintenance of DNA methylation	Kawahara, Yoshihiro, et al. "Improvement of the Oryza sativa Nipponbare reference genome using next generation sequence and optical map data." Rice 6.1 (2013): 4.
5.3.3.8	RXN-7931	1.0 CPD-7221 -> 1.0 CPD-7222	fatty acid beta-oxidation multifunctional protein AIM1	fatty acid oxidation	Richmond, Todd A., and Anthony B. Bleecker. "A defect in β-oxidation causes abnormal inflorescence development in Arabidopsis." The Plant Cell 11.10 (1999): 1911-1923.
5.3.3.8	RXN-7836	1.0 Trans-3-enoyl-CoAs <> 1.0 TRANS-D2-ENOYL-COA	fatty acid beta-oxidation multifunctional protein AIM1	fatty acid oxidation	Richmond, Todd A., and Anthony B. Bleecker. "A defect in β-oxidation causes abnormal inflorescence development in Arabidopsis." The Plant Cell 11.10 (1999): 1911-1923.
5.3.3.8	ENOYL-COA-DELTA-ISOM-RXN	1.0 CIS-DELTA3-ENOYL-COA <> 1.0 TRANS-D2-ENOYL-COA	fatty acid beta-oxidation multifunctional protein AIM1	fatty acid oxidation	Richmond, Todd A., and Anthony B. Bleecker. "A defect in β-oxidation causes abnormal inflorescence development in Arabidopsis." The Plant Cell 11.10 (1999): 1911-1923.
3.6.4.6	3.6.4.6-RXN	1.0 ATP -> 1.0 Pi + 1.0 ADP	Protein SUPPRESSOR OF K(+) TRANSPORT GROWTH DEFECT 1	vesicle-fusing ATPase	Haas, Thomas J., et al. "The Arabidopsis AAA ATPase SKD1 is involved in multivesicular endosome function and interacts with its positive regulator LYST-INTERACTING PROTEIN5." The Plant Cell 19.4 (2007): 1295-1312.
3.4.24.84	RXN-11698	1.0 Protein-S-farnesyl-L-cysteines -> 1.0 Peptide-Group + 1.0 PROTEIN-C-TERMINAL-S-ETC-CYSTEINE	CAAX prenyl protease 1	CAAX-box protein processing/Terpenoid backbone biosynthesis	Bracha, Keren, Meirav Lavy, and Shaul Yalovsky. "The Arabidopsis AtSTE24 is a CaaXprotease with broad substrate specificity." Journal of Biological Chemistry 277.33 (2002): 29856-29864.
2.3.1.180	RXN-11474	1.0 MALONYL-ACP + 1.0 CPD-12454 -> 1.0 CO-A + 1.0 3-Ketoglutaryl-ACP-methyl-ester + 1.0 CARBON-DIOXIDE	3-oxoacyl-[acyl-carrier-protein] synthase III	fatty acid biosynthetic process	Production of short-chain-length/medium-chain-length polyhydroxyalkanoate (PHA) copolymer in the plastid of Arabidopsis thaliana using an engineered 3-ketoacyl-acyl carrier protein synthase III
2.3.1.180	2.3.1.180-RXN	1.0 MALONYL-ACP + 1.0 ACETYL-COA -> 1.0 CO-A + 1.0 Acetoacetyl-ACPs + 1.0 CARBON-DIOXIDE	3-oxoacyl-[acyl-carrier-protein] synthase III	fatty acid biosynthetic process	Production of short-chain-length/medium-chain-length polyhydroxyalkanoate (PHA) copolymer in the plastid of Arabidopsis thaliana using an engineered 3-ketoacyl-acyl carrier protein synthase III
2.3.2.2	RXN-9157	1.0 CPD-9699 + 1.0 GLUTATHIONE -> 1.0 CYS-GLY + 1.0 CPD-9700	gamma-glutamyltransferase	glutathione metabolic process	Ohkama‐Ohtsu, Naoko, et al. "Glutathione conjugates in the vacuole are degraded by γ‐glutamyl transpeptidase GGT3 in Arabidopsis." The Plant Journal 49.5 (2007): 878-888.
2.4.1.32	2.4.1.32-RXN	1.0 GDP-MANNOSE + 1.0 Glucomannans_in -> 1.0 GDP + 1.0 Glucomannans_out	Glucomannan 4-beta-mannosyltransferase 1	galactomannan synthesis	Liepman, Aaron H., et al. "Functional genomic analysis supports conservation of function among cellulose synthase-like a gene family members and suggests diverse roles of mannans in plants." Plant Physiology 143.4 (2007): 1881-1893.
2.3.1.16	RXN-10700	1.0 CO-A + 1.0 CPD-11524 -> 1.0 CPD-11525 + 1.0 ACETYL-COA	3-ketoacyl-CoA thiolase 2	fatty-acid beta-oxidation	Castillo, M. Cruz, et al. "Gene-specific involvement of β-oxidation in wound-activated responses in Arabidopsis." Plant Physiology 135.1 (2004): 85-94.
2.3.1.16	RXN-10699	1.0 CO-A + 1.0 CPD-11520 -> 1.0 CPD-11521 + 1.0 ACETYL-COA	3-ketoacyl-CoA thiolase 2	fatty-acid beta-oxidation	Castillo, M. Cruz, et al. "Gene-specific involvement of β-oxidation in wound-activated responses in Arabidopsis." Plant Physiology 135.1 (2004): 85-94.
2.3.1.16	RXN-11246	1.0 CO-A + 1.0 CPD-12200 -> 1.0 CPD-201 + 1.0 ACETYL-COA	3-ketoacyl-CoA thiolase 2	fatty-acid beta-oxidation	Castillo, M. Cruz, et al. "Gene-specific involvement of β-oxidation in wound-activated responses in Arabidopsis." Plant Physiology 135.1 (2004): 85-94.
2.3.1.16	RXN-10701	1.0 CO-A + 1.0 CPD-11528 -> 1.0 CPD-11529 + 1.0 ACETYL-COA	3-ketoacyl-CoA thiolase 2	fatty-acid beta-oxidation	Castillo, M. Cruz, et al. "Gene-specific involvement of β-oxidation in wound-activated responses in Arabidopsis." Plant Physiology 135.1 (2004): 85-94.
2.3.1.64	AGMATINE-N4-COUMAROYLTRANSFERASE-RXN	1.0 AGMATHINE + 1.0 COUMAROYL-COA -> 1.0 CO-A + 1.0 N-4-GUANIDINOBUTYL-4-HYDROXYCINNAMAMID	Agmatine coumaroyltransferase	biosynthesis of hydroxycinnamic acid amides	Muroi, Atsushi, et al. "Accumulation of hydroxycinnamic acid amides induced by pathogen infection and identification of agmatine coumaroyltransferase in Arabidopsis thaliana." Planta 230.3 (2009): 517.
1.8.7.2	RXN-9944	1.0 Ox-Thioredoxin + 2.0 Reduced-ferredoxins -> 2.0 Oxidized-ferredoxins + 1.0 Red-Thioredoxin	Ferredoxin-thioredoxin reductase	light dependent redox regulatory system controlling enzyme activities in oxygenic photosynthetic cells	Keryer, Eliane, et al. "Characterization of Arabidopsis mutants for the variable subunit of ferredoxin: thioredoxin reductase." Photosynthesis Research 79.3 (2004): 265-274.
4.2.99.18	RXN0-2601	1.0 Damaged-DNA-Pyrimidine -> 1.0 DNA-containing-a-Apyrimidinic-Sites	DNA-(apurinic or apyrimidinic site) lyase	DNA repair and in the regulation of transcription	Gutman, Benjamin L., and Krishna K. Niyogi. "Evidence for base excision repair of oxidative DNA damage in chloroplasts of Arabidopsis thaliana." Journal of Biological Chemistry 284.25 (2009): 17006-17012.
4.2.99.18	4.2.99.18-RXN	1.0 DNA-containing-abasic-Sites -> 1.0 5-Phosphopolynucleotides + 1.0 3-terminal-unsaturated-sugars	DNA-(apurinic or apyrimidinic site) lyase	DNA repair and in the regulation of transcription	Gutman, Benjamin L., and Krishna K. Niyogi. "Evidence for base excision repair of oxidative DNA damage in chloroplasts of Arabidopsis thaliana." Journal of Biological Chemistry 284.25 (2009): 17006-17012.
1.5.3.14	RXN-10465	1.0 N1-ACETYLSPERMINE + 1.0 OXYGEN-MOLECULE -> 1.0 CPD-313 + 1.0 CPD-11271 + 1.0 HYDROGEN-PEROXIDE	polyamine oxidase	regulation of polyamine intracellular concentration	Fiorillo, Annarita, et al. "The structure of maize polyamine oxidase K300M mutant in complex with the natural substrates provides a snapshot of the catalytic mechanism of polyamine oxidation." FEBS journal 278.5 (2011): 809-821.
1.5.3.14	RXN-6421	1.0 SPERMINE + 1.0 OXYGEN-MOLECULE -> 1.0 CPD-6121 + 1.0 CPD-313 + 1.0 HYDROGEN-PEROXIDE	polyamine oxidase	regulation of polyamine intracellular concentration	Fiorillo, Annarita, et al. "The structure of maize polyamine oxidase K300M mutant in complex with the natural substrates provides a snapshot of the catalytic mechanism of polyamine oxidation." FEBS journal 278.5 (2011): 809-821.
2.7.1.151	2.7.1.151-RXN	1.0 INOSITOL-1-4-5-TRISPHOSPHATE + 1.0 ATP -> 1.0 INOSITOL-1456-TETRAKISPHOSPHATE + 1.0 ADP	Inositol polyphosphate multikinase IPK2	Inositol phosphate metabolism	Yotsushima, Kenji, Toshiaki Mitsui, and Toshiro Hayakawa. "Purification of phosphoinositol kinase from suspension-cultured cells of rice (Oryza sativa L.)." Bioscience, biotechnology, and biochemistry 59.10 (1995): 1953-1955.
2.7.1.151	RXN-7162	1.0 INOSITOL-1456-TETRAKISPHOSPHATE + 1.0 ATP -> 1.0 CPD-1107 + 1.0 ADP	Inositol polyphosphate multikinase IPK2	Inositol phosphate metabolism	Yotsushima, Kenji, Toshiaki Mitsui, and Toshiro Hayakawa. "Purification of phosphoinositol kinase from suspension-cultured cells of rice (Oryza sativa L.)." Bioscience, biotechnology, and biochemistry 59.10 (1995): 1953-1955.
2.7.1.151	RXN-10948	1.0 CPD-193 + 1.0 ATP -> 1.0 INOSITOL-1-4-5-TRISPHOSPHATE + 1.0 ADP	Inositol polyphosphate multikinase IPK2	Inositol phosphate metabolism	Yotsushima, Kenji, Toshiaki Mitsui, and Toshiro Hayakawa. "Purification of phosphoinositol kinase from suspension-cultured cells of rice (Oryza sativa L.)." Bioscience, biotechnology, and biochemistry 59.10 (1995): 1953-1955.
2.7.1.151	RXN-7184	1.0 CPD-506 + 1.0 ATP -> 1.0 CPD-1107 + 1.0 ADP	Inositol polyphosphate multikinase IPK2	Inositol phosphate metabolism	Yotsushima, Kenji, Toshiaki Mitsui, and Toshiro Hayakawa. "Purification of phosphoinositol kinase from suspension-cultured cells of rice (Oryza sativa L.)." Bioscience, biotechnology, and biochemistry 59.10 (1995): 1953-1955.
2.3.1.12	DIHYDLIPACETRANS-RXN	1.0 ACETYL-COA + 1.0 DIHYDROLIPOAMIDE <> 1.0 CO-A + 1.0 S-ACETYLDIHYDROLIPOAMIDE	Acetyltransferase component of pyruvate dehydrogenase complex	pyruvate decarboxylation to acetyl CoA	Mooney, Brian P., Jan A. Miernyk, and Douglas D. Randall. "Cloning and Characterization of the DihydrolipoamideS-Acetyltransferase Subunit of the Plastid Pyruvate Dehydrogenase Complex (E2) from Arabidopsis." Plant physiology 120.2 (1999): 443-452.
4.2.3.33	RXN-4882	1.0 CPD-8719 -> 1.0 PPI + 1.0 CPD-4752	Stemar-13-ene synthase	diterpenoid phytoalexin biosynthesis	Nemoto, Tadahiro, et al. "Stemar‐13‐ene synthase, a diterpene cyclase involved in the biosynthesis of the phytoalexin oryzalexin S in rice." FEBS letters 571.1-3 (2004): 182-186.
4.2.3.35	RXN-4883	1.0 CPD-8719 -> 1.0 CPD-4754 + 1.0 PPI	Syn-pimara-7,15-diene synthase	diterpenoid phytoalexin biosynthesis	Wilderman, P. Ross, et al. "Identification of syn-pimara-7, 15-diene synthase reveals functional clustering of terpene synthases involved in rice phytoalexin/allelochemical biosynthesis." Plant Physiology 135.4 (2004): 2098-2105.
5.5.1.14	RXN-8528	1.0 GERANYLGERANYL-PP -> 1.0 CPD-8719	Syn-copalyl diphosphate synthase	diterpenoid phytoalexin biosynthesis	Xu, Meimei, et al. "Functional identification of rice syn‐copalyl diphosphate synthase and its role in initiating biosynthesis of diterpenoid phytoalexin/allelopathic natural products." The Plant Journal 39.3 (2004): 309-318.
4.2.3.28	RXN-4881	1.0 ENT-COPALYL-DIPHOSPHATE -> 1.0 PPI + 1.0 CPD-4751	Ent-cassa-12,15-diene synthase	diterpenoid phytoalexin biosynthesis	Xu, Meimei, et al. "Functional characterization of the rice kaurene synthase-like gene family." Phytochemistry 68.3 (2007): 312-326.
2.5.1.46	2.5.1.46-RXN	1.0 EIF5A-LYSINE + 1.0 SPERMIDINE -> 1.0 CPD-9973 + 1.0 CPD-313	Deoxyhypusine synthase	eIF5A hypusination	Leaf-specific suppression of deoxyhypusine synthase in Arabidopsis thaliana enhances growth without negative pleiotropic effects. Duguay, J.; Jamal, S.; Liu, Z.; Wang, T.W.; Thompson, J.E.; J. Plant Physiol. 164, 408-420 (2007)
5.1.2.3	5.1.2.3-RXN	1.0 S-3-HYDROXYBUTANOYL-COA -> 1.0 CPD-650	fatty acid beta-oxidation multifunctional protein	fatty acid beta-oxidation	Chuong, Simon DX, Robert T. Mullen, and Douglas G. Muench. "Identification of a rice RNA-and microtubule-binding protein as the multifunctional protein, a peroxisomal enzyme involved in the β-oxidation of fatty acids." Journal of Biological Chemistry 277.4 (2002): 2419-2429.
5.1.2.3	OHBUTYRYL-COA-EPIM-RXN	1.0 D-3-HYDROXYACYL-COA <> 1.0 L-3-HYDROXYACYL-COA	fatty acid beta-oxidation multifunctional protein	fatty acid beta-oxidation	Chuong, Simon DX, Robert T. Mullen, and Douglas G. Muench. "Identification of a rice RNA-and microtubule-binding protein as the multifunctional protein, a peroxisomal enzyme involved in the β-oxidation of fatty acids." Journal of Biological Chemistry 277.4 (2002): 2419-2429.
1.10.3.1	CATECHOL-OXIDASE-RXN	2.0 CATECHOL + 1.0 OXYGEN-MOLECULE -> 2.0 CPD-385	catechol oxidase	o-diquinones biosynthesis	Characterization of polyphenol oxidase from Solanum tuberosum Jasim. Jang, J.; Shin, J.; Song, K.; Food Sci. Biotechnol. 14, 117-122 (2005)
1.10.3.1	RXN-8332	1.0 OXYGEN-MOLECULE + 2.0 CPD-8098 -> 2.0 CPD-8094	catechol oxidase	o-diquinones biosynthesis	Characterization of polyphenol oxidase from Solanum tuberosum Jasim. Jang, J.; Shin, J.; Song, K.; Food Sci. Biotechnol. 14, 117-122 (2005)
2.7.7.64	2.7.7.64-RXN	1.0 Sugar-1-Phosphate + 1.0 UTP -> 1.0 UDP-sugar + 1.0 PPI	UDP-sugar pyrophosphorylase	eIF5A hypusination	Duguay, Jeremy, et al. "Leaf-specific suppression of deoxyhypusine synthase in Arabidopsis thaliana enhances growth without negative pleiotropic effects." Journal of plant physiology 164.4 (2007): 408-420.
2.6.1.80	2.6.1.80-RXN	1.0 CPD-463 + 1.0 2-KETOGLUTARATE -> 1.0 GLT + 1.0 CPD-7228	Nicotianamine aminotransferase	fatty acid beta oxidation	Chuong, Simon DX, Robert T. Mullen, and Douglas G. Muench. "Identification of a rice RNA-and microtubule-binding protein as the multifunctional protein, a peroxisomal enzyme involved in the β-oxidation of fatty acids." Journal of Biological Chemistry 277.4 (2002): 2419-2429.
2.7.9.4	2.7.9.4-RXN	1.0 CPD-8531 + 1.0 ATP -> 1.0 AMP + 1.0 Phospho-alpha-glucans + 1.0 Pi	Alpha-glucan water dikinase 1	starch degradation II	Yu, Tien-Shin, et al. "The Arabidopsis sex1 mutant is defective in the R1 protein, a general regulator of starch degradation in plants, and not in the chloroplast hexose transporter." The Plant Cell 13.8 (2001): 1907-1918.
2.5.1.39	RXN-9230	1.0 CPD-9610 + 1.0 4-hydroxybenzoate -> 1.0 CPD-9864 + 1.0 PPI	4-hydroxybenzoate polyprenyltransferase	ubiquinone biosynthesis	Okada, Kazunori, et al. "The AtPPT1 gene encoding 4-hydroxybenzoate polyprenyl diphosphate transferase in ubiquinone biosynthesis is required for embryo development in Arabidopsis thaliana." Plant molecular biology 55.4 (2004): 567-577.
2.5.1.39	RXN-9222	1.0 ALL-TRANS-HEPTAPRENYL-DIPHOSPHATE + 1.0 4-hydroxybenzoate -> 1.0 PPI + 1.0 CPD-9852	4-hydroxybenzoate polyprenyltransferase	ubiquinone biosynthesis	Okada, Kazunori, et al. "The AtPPT1 gene encoding 4-hydroxybenzoate polyprenyl diphosphate transferase in ubiquinone biosynthesis is required for embryo development in Arabidopsis thaliana." Plant molecular biology 55.4 (2004): 567-577.
2.5.1.39	4OHBENZOATE-OCTAPRENYLTRANSFER-RXN	1.0 4-hydroxybenzoate + 1.0 OCTAPRENYL-DIPHOSPHATE -> 1.0 PPI + 1.0 3-OCTAPRENYL-4-HYDROXYBENZOATE	4-hydroxybenzoate polyprenyltransferase	ubiquinone biosynthesis	Okada, Kazunori, et al. "The AtPPT1 gene encoding 4-hydroxybenzoate polyprenyl diphosphate transferase in ubiquinone biosynthesis is required for embryo development in Arabidopsis thaliana." Plant molecular biology 55.4 (2004): 567-577.
2.5.1.39	2.5.1.39-RXN	1.0 SOLANESYL-PYROPHOSPHATE + 1.0 4-hydroxybenzoate -> 1.0 PPI + 1.0 NONAPRENYL-4-HYDROXYBENZOATE	4-hydroxybenzoate polyprenyltransferase	ubiquinone biosynthesis	Okada, Kazunori, et al. "The AtPPT1 gene encoding 4-hydroxybenzoate polyprenyl diphosphate transferase in ubiquinone biosynthesis is required for embryo development in Arabidopsis thaliana." Plant molecular biology 55.4 (2004): 567-577.
2.5.1.39	RXN-9003	1.0 4-hydroxybenzoate + 1.0 ALL-TRANS-HEXAPRENYL-DIPHOSPHATE -> 1.0 PPI + 1.0 3-HEXAPRENYL-4-HYDROXYBENZOATE	4-hydroxybenzoate polyprenyltransferase	ubiquinone biosynthesis	Okada, Kazunori, et al. "The AtPPT1 gene encoding 4-hydroxybenzoate polyprenyl diphosphate transferase in ubiquinone biosynthesis is required for embryo development in Arabidopsis thaliana." Plant molecular biology 55.4 (2004): 567-577.
2.5.1.39	RXN-11368	1.0 4-hydroxybenzoate + 1.0 Polyisoprenyl-Diphosphates -> 1.0 PPI + 1.0 4-Hydroxy-3-polyprenylbenzoates	4-hydroxybenzoate polyprenyltransferase	ubiquinone biosynthesis	Okada, Kazunori, et al. "The AtPPT1 gene encoding 4-hydroxybenzoate polyprenyl diphosphate transferase in ubiquinone biosynthesis is required for embryo development in Arabidopsis thaliana." Plant molecular biology 55.4 (2004): 567-577.
2.7.9.5	2.7.9.5-RXN	1.0 Phospho-alpha-glucans + 1.0 ATP -> 1.0 AMP + 1.0 Pi + 1.0 O-phospho-phospho-alpha-glucans	Phosphoglucan, water dikinase	starch degradation II	Kötting, Oliver, et al. "Identification of a novel enzyme required for starch metabolism in Arabidopsis leaves. The phosphoglucan, water dikinase." Plant Physiology 137.1 (2005): 242-252.
2.1.1.64	DHHB-METHYLTRANSFER-RXN	1.0 OCTAPRENYL-METHYL-OH-METHOXY-BENZQ + 1.0 S-ADENOSYLMETHIONINE -> 1.0 ADENOSYL-HOMO-CYS + 1.0 CPD-9956	Ubiquinone biosynthesis O-methyltransferase	ubiquinone biosynthesis	Avelange‐Macherel, Marie‐Hélène, and Jacques Joyard. "Cloning and functional expression of AtCOQ3, the Arabidopsis homologue of the yeast COQ3 gene, encoding a methyltransferase from plant mitochondria involved in ubiquinone biosynthesis." The Plant Journal 14.2 (1998): 203-213.
2.1.1.64	RXN-9237	1.0 CPD-9873 + 1.0 S-ADENOSYLMETHIONINE -> 1.0 CPD-9958 + 1.0 ADENOSYL-HOMO-CYS	Ubiquinone biosynthesis O-methyltransferase	ubiquinone biosynthesis	Avelange‐Macherel, Marie‐Hélène, and Jacques Joyard. "Cloning and functional expression of AtCOQ3, the Arabidopsis homologue of the yeast COQ3 gene, encoding a methyltransferase from plant mitochondria involved in ubiquinone biosynthesis." The Plant Journal 14.2 (1998): 203-213.
2.1.1.64	RXN-11758	1.0 Demethylated-Ubiquinols + 1.0 S-ADENOSYLMETHIONINE -> 1.0 Ubiquinols + 1.0 ADENOSYL-HOMO-CYS	Ubiquinone biosynthesis O-methyltransferase	ubiquinone biosynthesis	Avelange‐Macherel, Marie‐Hélène, and Jacques Joyard. "Cloning and functional expression of AtCOQ3, the Arabidopsis homologue of the yeast COQ3 gene, encoding a methyltransferase from plant mitochondria involved in ubiquinone biosynthesis." The Plant Journal 14.2 (1998): 203-213.
2.1.1.64	RXN-9229	1.0 CPD-9861 + 1.0 S-ADENOSYLMETHIONINE -> 1.0 CPD-9955 + 1.0 ADENOSYL-HOMO-CYS	Ubiquinone biosynthesis O-methyltransferase	ubiquinone biosynthesis	Avelange‐Macherel, Marie‐Hélène, and Jacques Joyard. "Cloning and functional expression of AtCOQ3, the Arabidopsis homologue of the yeast COQ3 gene, encoding a methyltransferase from plant mitochondria involved in ubiquinone biosynthesis." The Plant Journal 14.2 (1998): 203-213.
2.1.1.64	RXN3O-102	1.0 2-HEXAPRENYL-3-METHYL-5-HYDROXY-6-METHOX + 1.0 S-ADENOSYLMETHIONINE -> 1.0 UBIQUINOL-30 + 1.0 ADENOSYL-HOMO-CYS	Ubiquinone biosynthesis O-methyltransferase	ubiquinone biosynthesis	Avelange‐Macherel, Marie‐Hélène, and Jacques Joyard. "Cloning and functional expression of AtCOQ3, the Arabidopsis homologue of the yeast COQ3 gene, encoding a methyltransferase from plant mitochondria involved in ubiquinone biosynthesis." The Plant Journal 14.2 (1998): 203-213.
2.1.1.77	2.1.1.77-RXN	1.0 PROTEIN-L-BETA-ISOASPARTATES + 1.0 S-ADENOSYLMETHIONINE -> 1.0 PROTEIN-L-BETA-ISOSPARTATE-METHYL-ESTERS + 1.0 ADENOSYL-HOMO-CYS	Protein-L-isoaspartate O-methyltransferase 1	repair and/or degradation of damaged proteins	Wei, Yidong, et al. "Protein repairl-isoaspartyl methyltransferase 1 (PIMT1) in rice improves seed longevity by preserving embryo vigor and viability." Plant molecular biology 89.4-5 (2015): 475-492.
2.4.1.119/shifted to 2.4.99.18	2.4.1.119-RXN	1.0 Protein-L-Asparagine + 1.0 OLIGOSACCHARIDE-DIPHOSPHODOLICHOL -> 1.0 Glycoprotein-Asn-oligosaccharides + 1.0 CPD-224	dolichyl-diphosphooligosaccharide-protein glycotransferase	protein glycosylation	Lerouxel, Olivier, et al. "Mutants in DEFECTIVE GLYCOSYLATION, an Arabidopsis homolog of an oligosaccharyltransferase complex subunit, show protein underglycosylation and defects in cell differentiation and growth." The Plant Journal 42.4 (2005): 455-468.
2.7.7.63/shifted to 6.3.1.20	RXN-8654	1.0 LIPOIC-ACID + 1.0 ATP -> 1.0 PPI + 1.0 LIPOYL-AMP	lipoate-protein ligase	lipoate biosynthesis	Kang, Sang Gu, et al. "Characterization of a lipoate-protein ligase A gene of rice (Oryza sativa L.)." Gene 393.1 (2007): 53-61.
2.7.7.63/shifted to 6.3.1.20	RXN-8655	1.0 Non-lipoylated-domains + 1.0 LIPOYL-AMP -> 1.0 AMP + 1.0 Lipoylated-domains	lipoate-protein ligase	lipoate biosynthesis	Kang, Sang Gu, et al. "Characterization of a lipoate-protein ligase A gene of rice (Oryza sativa L.)." Gene 393.1 (2007): 53-61.
3.2.2.3	INOSINE-NUCLEOSIDASE-RXN	1.0 INOSINE -> 1.0 RIBOSE + 1.0 HYPOXANTHINE	uridine nucleosidase 1	uridine degradation pathway	Jung, Benjamin, et al. "Uridine-ribohydrolase is a key regulator in the uridine degradation pathway of Arabidopsis." The Plant Cell 21.3 (2009): 876-891.
3.2.2.3	URIDINE-NUCLEOSIDASE-RXN	1.0 URIDINE -> 1.0 RIBOSE + 1.0 URACIL	uridine nucleosidase 1	uridine degradation pathway	Jung, Benjamin, et al. "Uridine-ribohydrolase is a key regulator in the uridine degradation pathway of Arabidopsis." The Plant Cell 21.3 (2009): 876-891.
1.8.3.2	THIOL-OXIDASE-RXN	1.0 OXYGEN-MOLECULE + 4.0 Sulfhydryls -> 2.0 CPD-8529	Thiol Oxidase	o-diquinones biosynthesis	Spagna, Giovanni, et al. "Characterization of a tomato polyphenol oxidase and its role in browning and lycopene content." Journal of agricultural and food chemistry 53.6 (2005): 2032-2038.
1.1.1.100	3-OXOACYL-ACP-REDUCT-RXN	1.0 OH-ACYL-ACP + 1.0 NADP <> 1.0 NADPH + 1.0 B-KETOACYL-ACP	3-oxoacyl-[acyl-carrier-protein] reductase	Fatty acid biosynthesis	Slabas, A. R., et al. "Molecular cloning of higher-plant 3-oxoacyl-(acyl carrier protein) reductase. Sequence identities with the nodG-gene product of the nitrogen-fixing soil bacterium Rhizobium meliloti." Biochemical journal 283.2 (1992): 321-326.
1.1.1.100	RXN-11480	1.0 NADPH + 1.0 3-Ketopimeloyl-ACP-methyl-esters -> 1.0 3-hydroxypimeloyl-ACP-methyl-esters + 1.0 NADP	3-oxoacyl-[acyl-carrier-protein] reductase	Fatty acid biosynthesis	Slabas, A. R., et al. "Molecular cloning of higher-plant 3-oxoacyl-(acyl carrier protein) reductase. Sequence identities with the nodG-gene product of the nitrogen-fixing soil bacterium Rhizobium meliloti." Biochemical journal 283.2 (1992): 321-326.
1.1.1.100	RXN-9556	1.0 NADPH + 1.0 3-oxo-cis-vaccenoyl-ACPs -> 1.0 NADP + 1.0 R-3-hydroxy-cis-vaccenoyl-ACPs	3-oxoacyl-[acyl-carrier-protein] reductase	Fatty acid biosynthesis	Slabas, A. R., et al. "Molecular cloning of higher-plant 3-oxoacyl-(acyl carrier protein) reductase. Sequence identities with the nodG-gene product of the nitrogen-fixing soil bacterium Rhizobium meliloti." Biochemical journal 283.2 (1992): 321-326.
1.1.1.100	RXN1G-481	1.0 NADPH + 1.0 cis-cis-D15-27-3-oxo-C46-2-ACPs -> 1.0 NADP + 1.0 cis-cis-D15-27-3-hydroxyC46-2-ACPs	3-oxoacyl-[acyl-carrier-protein] reductase	Fatty acid biosynthesis	Slabas, A. R., et al. "Molecular cloning of higher-plant 3-oxoacyl-(acyl carrier protein) reductase. Sequence identities with the nodG-gene product of the nitrogen-fixing soil bacterium Rhizobium meliloti." Biochemical journal 283.2 (1992): 321-326.
1.1.1.100	RXN1G-72	1.0 NADPH + 1.0 cis-delta5-3-oxo-lignoceroyl-ACPs -> 1.0 cis-delta5-3-hydroxylignoceroyl-ACPs + 1.0 NADP	3-oxoacyl-[acyl-carrier-protein] reductase	Fatty acid biosynthesis	Slabas, A. R., et al. "Molecular cloning of higher-plant 3-oxoacyl-(acyl carrier protein) reductase. Sequence identities with the nodG-gene product of the nitrogen-fixing soil bacterium Rhizobium meliloti." Biochemical journal 283.2 (1992): 321-326.
1.1.1.100	RXN-9524	1.0 NADPH + 1.0 3-Oxo-octanoyl-ACPs -> 1.0 NADP + 1.0 3-Hydroxy-octanoyl-ACPs	3-oxoacyl-[acyl-carrier-protein] reductase	Fatty acid biosynthesis	Slabas, A. R., et al. "Molecular cloning of higher-plant 3-oxoacyl-(acyl carrier protein) reductase. Sequence identities with the nodG-gene product of the nitrogen-fixing soil bacterium Rhizobium meliloti." Biochemical journal 283.2 (1992): 321-326.
1.1.1.100	RXN-9552	1.0 NADP + 1.0 3-oxo-petroselinoyl-ACPs -> 1.0 NADPH + 1.0 R-3-hydroxypetroselinoyl-ACPs	3-oxoacyl-[acyl-carrier-protein] reductase	Fatty acid biosynthesis	Slabas, A. R., et al. "Molecular cloning of higher-plant 3-oxoacyl-(acyl carrier protein) reductase. Sequence identities with the nodG-gene product of the nitrogen-fixing soil bacterium Rhizobium meliloti." Biochemical journal 283.2 (1992): 321-326.
1.1.1.100	RXN-10655	1.0 NADPH + 1.0 3-oxo-cis-D7-tetradecenoyl-ACPs -> 1.0 NADP + 1.0 3-hydroxy-cis-D7-tetraecenoyl-ACPs	3-oxoacyl-[acyl-carrier-protein] reductase	Fatty acid biosynthesis	Slabas, A. R., et al. "Molecular cloning of higher-plant 3-oxoacyl-(acyl carrier protein) reductase. Sequence identities with the nodG-gene product of the nitrogen-fixing soil bacterium Rhizobium meliloti." Biochemical journal 283.2 (1992): 321-326.
1.1.1.100	RXN1G-469	1.0 NADPH + 1.0 3-oxo-behenoyl-ACPs -> 1.0 R-3-hydroxybehenoyl-ACPs + 1.0 NADP	3-oxoacyl-[acyl-carrier-protein] reductase	Fatty acid biosynthesis	Slabas, A. R., et al. "Molecular cloning of higher-plant 3-oxoacyl-(acyl carrier protein) reductase. Sequence identities with the nodG-gene product of the nitrogen-fixing soil bacterium Rhizobium meliloti." Biochemical journal 283.2 (1992): 321-326.
1.1.1.100	RXN-9633	1.0 NADPH + 1.0 3-oxo-stearoyl-ACPs -> 1.0 R-3-hydroxystearoyl-ACPs + 1.0 NADP	3-oxoacyl-[acyl-carrier-protein] reductase	Fatty acid biosynthesis	Slabas, A. R., et al. "Molecular cloning of higher-plant 3-oxoacyl-(acyl carrier protein) reductase. Sequence identities with the nodG-gene product of the nitrogen-fixing soil bacterium Rhizobium meliloti." Biochemical journal 283.2 (1992): 321-326.
1.1.1.100	RXN1G-951	1.0 NADPH + 1.0 cis-cis-D19-31-3-oxo-C50-2-ACPs -> 1.0 cis-cis-D19-31-3-hydroxyC50-2-ACPs + 1.0 NADP	3-oxoacyl-[acyl-carrier-protein] reductase	Fatty acid biosynthesis	Slabas, A. R., et al. "Molecular cloning of higher-plant 3-oxoacyl-(acyl carrier protein) reductase. Sequence identities with the nodG-gene product of the nitrogen-fixing soil bacterium Rhizobium meliloti." Biochemical journal 283.2 (1992): 321-326.
1.1.1.100	RXN1G-881	1.0 NADPH + 1.0 cis-delta17-3-oxo-C36-ACPs -> 1.0 cis-delta17-3-hydroxyC36-ACPs + 1.0 NADP	3-oxoacyl-[acyl-carrier-protein] reductase	Fatty acid biosynthesis	Slabas, A. R., et al. "Molecular cloning of higher-plant 3-oxoacyl-(acyl carrier protein) reductase. Sequence identities with the nodG-gene product of the nitrogen-fixing soil bacterium Rhizobium meliloti." Biochemical journal 283.2 (1992): 321-326.
1.1.1.100	RXN-9518	1.0 NADPH + 1.0 3-oxo-hexanoyl-ACPs -> 1.0 NADP + 1.0 R-3-hydroxyhexanoyl-ACPs	3-oxoacyl-[acyl-carrier-protein] reductase	Fatty acid biosynthesis	Slabas, A. R., et al. "Molecular cloning of higher-plant 3-oxoacyl-(acyl carrier protein) reductase. Sequence identities with the nodG-gene product of the nitrogen-fixing soil bacterium Rhizobium meliloti." Biochemical journal 283.2 (1992): 321-326.
1.1.1.100	RXN-9532	1.0 NADPH + 1.0 3-oxo-dodecanoyl-ACPs -> 1.0 NADP + 1.0 R-3-hydroxydodecanoyl-ACPs	3-oxoacyl-[acyl-carrier-protein] reductase	Fatty acid biosynthesis	Slabas, A. R., et al. "Molecular cloning of higher-plant 3-oxoacyl-(acyl carrier protein) reductase. Sequence identities with the nodG-gene product of the nitrogen-fixing soil bacterium Rhizobium meliloti." Biochemical journal 283.2 (1992): 321-326.
1.1.1.100	RXN1G-1053	1.0 NADPH + 1.0 cis-delta19-3-oxo-C38-ACPs -> 1.0 NADP + 1.0 cis-delta19-3-hydroxyC38-ACPs	3-oxoacyl-[acyl-carrier-protein] reductase	Fatty acid biosynthesis	Slabas, A. R., et al. "Molecular cloning of higher-plant 3-oxoacyl-(acyl carrier protein) reductase. Sequence identities with the nodG-gene product of the nitrogen-fixing soil bacterium Rhizobium meliloti." Biochemical journal 283.2 (1992): 321-326.
1.1.1.100	RXN0-2142	1.0 NADPH + 1.0 b-Keto-cis-D5-dodecenoyl-ACPs -> 1.0 NADP + 1.0 b-Hydroxy-cis-D5-dodecenoyl-ACPs	3-oxoacyl-[acyl-carrier-protein] reductase	Fatty acid biosynthesis	Slabas, A. R., et al. "Molecular cloning of higher-plant 3-oxoacyl-(acyl carrier protein) reductase. Sequence identities with the nodG-gene product of the nitrogen-fixing soil bacterium Rhizobium meliloti." Biochemical journal 283.2 (1992): 321-326.
1.1.1.100	RXN-9514	1.0 NADPH + 1.0 Acetoacetyl-ACPs -> 1.0 NADP + 1.0 Beta-3-hydroxybutyryl-ACPs	3-oxoacyl-[acyl-carrier-protein] reductase	Fatty acid biosynthesis	Slabas, A. R., et al. "Molecular cloning of higher-plant 3-oxoacyl-(acyl carrier protein) reductase. Sequence identities with the nodG-gene product of the nitrogen-fixing soil bacterium Rhizobium meliloti." Biochemical journal 283.2 (1992): 321-326.
1.1.1.100	RXN-9536	1.0 NADPH + 1.0 3-oxo-myristoyl-ACPs -> 1.0 NADP + 1.0 R-3-hydroxymyristoyl-ACPs	3-oxoacyl-[acyl-carrier-protein] reductase	Fatty acid biosynthesis	Slabas, A. R., et al. "Molecular cloning of higher-plant 3-oxoacyl-(acyl carrier protein) reductase. Sequence identities with the nodG-gene product of the nitrogen-fixing soil bacterium Rhizobium meliloti." Biochemical journal 283.2 (1992): 321-326.
1.1.1.100	RXN-9528	1.0 NADPH + 1.0 3-oxo-decanoyl-ACPs -> 1.0 Beta-hydroxydecanoyl-ACPs + 1.0 NADP	3-oxoacyl-[acyl-carrier-protein] reductase	Fatty acid biosynthesis	Slabas, A. R., et al. "Molecular cloning of higher-plant 3-oxoacyl-(acyl carrier protein) reductase. Sequence identities with the nodG-gene product of the nitrogen-fixing soil bacterium Rhizobium meliloti." Biochemical journal 283.2 (1992): 321-326.
1.1.1.100	RXN-11476	1.0 NADPH + 1.0 3-Ketoglutaryl-ACP-methyl-ester -> 1.0 NADP + 1.0 3-Hydroxyglutaryl-ACP-methyl-ester	3-oxoacyl-[acyl-carrier-protein] reductase	Fatty acid biosynthesis	Slabas, A. R., et al. "Molecular cloning of higher-plant 3-oxoacyl-(acyl carrier protein) reductase. Sequence identities with the nodG-gene product of the nitrogen-fixing soil bacterium Rhizobium meliloti." Biochemical journal 283.2 (1992): 321-326.
1.1.1.100	RXN1G-157	1.0 NADPH + 1.0 3-oxo-behenoyl-ACPs -> 1.0 R-3-hydroxybehenoyl-ACPs + 1.0 NADP	3-oxoacyl-[acyl-carrier-protein] reductase	Fatty acid biosynthesis	Slabas, A. R., et al. "Molecular cloning of higher-plant 3-oxoacyl-(acyl carrier protein) reductase. Sequence identities with the nodG-gene product of the nitrogen-fixing soil bacterium Rhizobium meliloti." Biochemical journal 283.2 (1992): 321-326.
1.1.1.100	RXN-9540	1.0 NADPH + 1.0 3-oxo-palmitoyl-ACPs -> 1.0 NADP + 1.0 R-3-Hydroxypalmitoyl-ACPs	3-oxoacyl-[acyl-carrier-protein] reductase	Fatty acid biosynthesis	Slabas, A. R., et al. "Molecular cloning of higher-plant 3-oxoacyl-(acyl carrier protein) reductase. Sequence identities with the nodG-gene product of the nitrogen-fixing soil bacterium Rhizobium meliloti." Biochemical journal 283.2 (1992): 321-326.
1.1.1.100	RXN1G-260	1.0 NADPH + 1.0 cis-delta13-3-oxo-lacceroyl-ACPs -> 1.0 cis-delta13-3-hydroxylacceroyl-ACPs + 1.0 NADP	3-oxoacyl-[acyl-carrier-protein] reductase	Fatty acid biosynthesis	Slabas, A. R., et al. "Molecular cloning of higher-plant 3-oxoacyl-(acyl carrier protein) reductase. Sequence identities with the nodG-gene product of the nitrogen-fixing soil bacterium Rhizobium meliloti." Biochemical journal 283.2 (1992): 321-326.
1.1.1.100	RXN1G-358	1.0 NADPH + 1.0 cis-delta15-3-oxo-gheddoyl-ACPs -> 1.0 cis-delta15-3-hydroxygheddoyl-ACPs + 1.0 NADP	3-oxoacyl-[acyl-carrier-protein] reductase	Fatty acid biosynthesis	Slabas, A. R., et al. "Molecular cloning of higher-plant 3-oxoacyl-(acyl carrier protein) reductase. Sequence identities with the nodG-gene product of the nitrogen-fixing soil bacterium Rhizobium meliloti." Biochemical journal 283.2 (1992): 321-326.
1.1.1.100	RXN1G-853	1.0 NADPH + 1.0 cis-cis-D11-29-3-oxo-C48-2-ACPs -> 1.0 cis-cis-D11-29-3-hydroxyC48-2-ACPs + 1.0 NADP	3-oxoacyl-[acyl-carrier-protein] reductase	Fatty acid biosynthesis	Slabas, A. R., et al. "Molecular cloning of higher-plant 3-oxoacyl-(acyl carrier protein) reductase. Sequence identities with the nodG-gene product of the nitrogen-fixing soil bacterium Rhizobium meliloti." Biochemical journal 283.2 (1992): 321-326.
1.1.1.100	RXN1G-287	1.0 NADPH + 1.0 cis-delta21-3-oxo-C40-ACPs -> 1.0 NADP + 1.0 cis-delta21-3-hydroxyC40-ACPs	3-oxoacyl-[acyl-carrier-protein] reductase	Fatty acid biosynthesis	Slabas, A. R., et al. "Molecular cloning of higher-plant 3-oxoacyl-(acyl carrier protein) reductase. Sequence identities with the nodG-gene product of the nitrogen-fixing soil bacterium Rhizobium meliloti." Biochemical journal 283.2 (1992): 321-326.
1.1.1.100	RXN1G-1050	1.0 NADPH + 1.0 cis-cis-D13-31-3-oxo-C50-2-ACPs -> 1.0 NADP + 1.0 cis-cis-D13-31-3-hydroxyC50-2-ACPs	3-oxoacyl-[acyl-carrier-protein] reductase	Fatty acid biosynthesis	Slabas, A. R., et al. "Molecular cloning of higher-plant 3-oxoacyl-(acyl carrier protein) reductase. Sequence identities with the nodG-gene product of the nitrogen-fixing soil bacterium Rhizobium meliloti." Biochemical journal 283.2 (1992): 321-326.
1.1.1.100	RXN1G-184	1.0 NADPH + 1.0 cis-cis-D17-35-3-oxo-C54-2-ACPs -> 1.0 cis-cis-D17-35-3-hydroxyC54-2-ACPs + 1.0 NADP	3-oxoacyl-[acyl-carrier-protein] reductase	Fatty acid biosynthesis	Slabas, A. R., et al. "Molecular cloning of higher-plant 3-oxoacyl-(acyl carrier protein) reductase. Sequence identities with the nodG-gene product of the nitrogen-fixing soil bacterium Rhizobium meliloti." Biochemical journal 283.2 (1992): 321-326.
1.1.1.100	RXN1G-408	1.0 NADPH + 1.0 cis-cis-D5-17-3-oxo-C36-2-ACPs -> 1.0 cis-cis-D5-17-3-hydroxyC36-2-ACPs + 1.0 NADP	3-oxoacyl-[acyl-carrier-protein] reductase	Fatty acid biosynthesis	Slabas, A. R., et al. "Molecular cloning of higher-plant 3-oxoacyl-(acyl carrier protein) reductase. Sequence identities with the nodG-gene product of the nitrogen-fixing soil bacterium Rhizobium meliloti." Biochemical journal 283.2 (1992): 321-326.
1.1.1.100	RXN1G-203	1.0 NADPH + 1.0 cis-cis-D13-25-3-oxo-C44-2-ACPs -> 1.0 cis-cis-D13-25-3-hydroxyC44-2-ACPs + 1.0 NADP	3-oxoacyl-[acyl-carrier-protein] reductase	Fatty acid biosynthesis	Slabas, A. R., et al. "Molecular cloning of higher-plant 3-oxoacyl-(acyl carrier protein) reductase. Sequence identities with the nodG-gene product of the nitrogen-fixing soil bacterium Rhizobium meliloti." Biochemical journal 283.2 (1992): 321-326.
1.1.1.100	RXN1G-617	1.0 NADPH + 1.0 cis-cis-D21-39-3-oxo-C58-2-ACPs -> 1.0 cis-cis-D21-39-3-hydroxyC58-2-ACPs + 1.0 NADP	3-oxoacyl-[acyl-carrier-protein] reductase	Fatty acid biosynthesis	Slabas, A. R., et al. "Molecular cloning of higher-plant 3-oxoacyl-(acyl carrier protein) reductase. Sequence identities with the nodG-gene product of the nitrogen-fixing soil bacterium Rhizobium meliloti." Biochemical journal 283.2 (1992): 321-326.
1.1.1.100	RXN1G-613	1.0 NADPH + 1.0 cis-cis-D9-27-3-oxo-C46-2-ACPs -> 1.0 NADP + 1.0 cis-cis-D9-27-3-hydroxyC46-2-ACPs	3-oxoacyl-[acyl-carrier-protein] reductase	Fatty acid biosynthesis	Slabas, A. R., et al. "Molecular cloning of higher-plant 3-oxoacyl-(acyl carrier protein) reductase. Sequence identities with the nodG-gene product of the nitrogen-fixing soil bacterium Rhizobium meliloti." Biochemical journal 283.2 (1992): 321-326.
1.1.1.100	RXN1G-384	1.0 NADPH + 1.0 cis-cis-D7-25-3-oxo-C44-2-ACPs -> 1.0 cis-cis-D7-25-3-hydroxyC44-2-ACPs + 1.0 NADP	3-oxoacyl-[acyl-carrier-protein] reductase	Fatty acid biosynthesis	Slabas, A. R., et al. "Molecular cloning of higher-plant 3-oxoacyl-(acyl carrier protein) reductase. Sequence identities with the nodG-gene product of the nitrogen-fixing soil bacterium Rhizobium meliloti." Biochemical journal 283.2 (1992): 321-326.
1.1.1.100	RXN1G-409	1.0 NADPH + 1.0 cis-cis-D19-37-3-oxo-C56-2-ACPs -> 1.0 cis-cis-D19-37-3-hydroxyC56-2-ACPs + 1.0 NADP	3-oxoacyl-[acyl-carrier-protein] reductase	Fatty acid biosynthesis	Slabas, A. R., et al. "Molecular cloning of higher-plant 3-oxoacyl-(acyl carrier protein) reductase. Sequence identities with the nodG-gene product of the nitrogen-fixing soil bacterium Rhizobium meliloti." Biochemical journal 283.2 (1992): 321-326.
1.1.1.100	RXN1G-252	1.0 NADPH + 1.0 cis-cis-D9-21-3-oxo-C40-2-ACPs -> 1.0 cis-cis-D9-21-3-hydroxyC40-2-ACPs + 1.0 NADP	3-oxoacyl-[acyl-carrier-protein] reductase	Fatty acid biosynthesis	Slabas, A. R., et al. "Molecular cloning of higher-plant 3-oxoacyl-(acyl carrier protein) reductase. Sequence identities with the nodG-gene product of the nitrogen-fixing soil bacterium Rhizobium meliloti." Biochemical journal 283.2 (1992): 321-326.
1.1.1.100	RXN1G-240	1.0 NADPH + 1.0 cis-delta9-3-oxo-montanoyl-ACPs -> 1.0 cis-delta9-3-hydroxymontanoyl-ACPs + 1.0 NADP	3-oxoacyl-[acyl-carrier-protein] reductase	Fatty acid biosynthesis	Slabas, A. R., et al. "Molecular cloning of higher-plant 3-oxoacyl-(acyl carrier protein) reductase. Sequence identities with the nodG-gene product of the nitrogen-fixing soil bacterium Rhizobium meliloti." Biochemical journal 283.2 (1992): 321-326.
1.1.1.100	RXN1G-262	1.0 NADPH + 1.0 cis-cis-D7-19-3-oxo-C38-2-ACPs -> 1.0 NADP + 1.0 cis-cis-D7-19-3-hydroxyC38-2-ACPs	3-oxoacyl-[acyl-carrier-protein] reductase	Fatty acid biosynthesis	Slabas, A. R., et al. "Molecular cloning of higher-plant 3-oxoacyl-(acyl carrier protein) reductase. Sequence identities with the nodG-gene product of the nitrogen-fixing soil bacterium Rhizobium meliloti." Biochemical journal 283.2 (1992): 321-326.
1.1.1.100	RXN1G-840	1.0 MALONYL-ACP + 1.0 cis-delta15-gheddoyl-ACPs -> 1.0 cis-delta17-3-oxo-C36-ACPs + 1.0 Holo-ACP-Synthases + 1.0 CARBON-DIOXIDE	3-oxoacyl-[acyl-carrier-protein] reductase	Fatty acid biosynthesis	Slabas, A. R., et al. "Molecular cloning of higher-plant 3-oxoacyl-(acyl carrier protein) reductase. Sequence identities with the nodG-gene product of the nitrogen-fixing soil bacterium Rhizobium meliloti." Biochemical journal 283.2 (1992): 321-326.
1.1.1.100	RXN1G-637	1.0 NADPH + 1.0 cis-cis-D11-23-3-oxo-C42-2-ACPs -> 1.0 cis-cis-D11-23-3-hydroxyC42-2-ACPs + 1.0 NADP	3-oxoacyl-[acyl-carrier-protein] reductase	Fatty acid biosynthesis	Slabas, A. R., et al. "Molecular cloning of higher-plant 3-oxoacyl-(acyl carrier protein) reductase. Sequence identities with the nodG-gene product of the nitrogen-fixing soil bacterium Rhizobium meliloti." Biochemical journal 283.2 (1992): 321-326.
1.1.1.100	RXN1G-717	1.0 NADPH + 1.0 cis-cis-D17-29-3-oxo-C48-2-ACPs -> 1.0 NADP + 1.0 cis-cis-D17-29-3-hydroxyC48-2-ACPs	3-oxoacyl-[acyl-carrier-protein] reductase	Fatty acid biosynthesis	Slabas, A. R., et al. "Molecular cloning of higher-plant 3-oxoacyl-(acyl carrier protein) reductase. Sequence identities with the nodG-gene product of the nitrogen-fixing soil bacterium Rhizobium meliloti." Biochemical journal 283.2 (1992): 321-326.
1.1.1.100	RXN1G-1247	1.0 NADPH + 1.0 cis-cis-D15-33-3-oxo-C52-2-ACPs -> 1.0 NADP + 1.0 cis-cis-D15-33-3-hydroxyC52-2-ACPs	3-oxoacyl-[acyl-carrier-protein] reductase	Fatty acid biosynthesis	Slabas, A. R., et al. "Molecular cloning of higher-plant 3-oxoacyl-(acyl carrier protein) reductase. Sequence identities with the nodG-gene product of the nitrogen-fixing soil bacterium Rhizobium meliloti." Biochemical journal 283.2 (1992): 321-326.
1.1.1.100	RXN1G-364	1.0 NADPH + 1.0 cis-delta7-3-oxo-cerotoyl-ACPs -> 1.0 NADP + 1.0 cis-delta7-3-hydroxycerotoyl-ACPs	3-oxoacyl-[acyl-carrier-protein] reductase	Fatty acid biosynthesis	Slabas, A. R., et al. "Molecular cloning of higher-plant 3-oxoacyl-(acyl carrier protein) reductase. Sequence identities with the nodG-gene product of the nitrogen-fixing soil bacterium Rhizobium meliloti." Biochemical journal 283.2 (1992): 321-326.
1.1.1.100	RXN1G-163	1.0 NADPH + 1.0 cis-delta11-3-oxo-melissoyl-ACPs -> 1.0 cis-delta11-3-hydroxymelissoyl-ACPs + 1.0 NADP	3-oxoacyl-[acyl-carrier-protein] reductase	Fatty acid biosynthesis	Slabas, A. R., et al. "Molecular cloning of higher-plant 3-oxoacyl-(acyl carrier protein) reductase. Sequence identities with the nodG-gene product of the nitrogen-fixing soil bacterium Rhizobium meliloti." Biochemical journal 283.2 (1992): 321-326.
1.1.1.100	RXN-10659	1.0 NADPH + 1.0 3-oxo-cis-D9-hexadecenoyl-ACPs -> 1.0 3-hydroxy-cis-D9-hexaecenoyl-ACPs + 1.0 NADP	3-oxoacyl-[acyl-carrier-protein] reductase	Fatty acid biosynthesis	Slabas, A. R., et al. "Molecular cloning of higher-plant 3-oxoacyl-(acyl carrier protein) reductase. Sequence identities with the nodG-gene product of the nitrogen-fixing soil bacterium Rhizobium meliloti." Biochemical journal 283.2 (1992): 321-326.
1.1.1.100	RXN1G-182	1.0 NADPH + 1.0 cis-cis-D5-23-3-oxo-C42-2-ACPs -> 1.0 cis-cis-D5-23-3-hydroxyC42-2-ACPs + 1.0 NADP	3-oxoacyl-[acyl-carrier-protein] reductase	Fatty acid biosynthesis	Slabas, A. R., et al. "Molecular cloning of higher-plant 3-oxoacyl-(acyl carrier protein) reductase. Sequence identities with the nodG-gene product of the nitrogen-fixing soil bacterium Rhizobium meliloti." Biochemical journal 283.2 (1992): 321-326.
2.7.1.139 (shifted to 2.7.1.134)	2.7.1.139-RXN	1.0 INOSITOL-1-3-4-TRIPHOSPHATE + 1.0 ATP -> 1.0 CPD-506 + 1.0 ADP
2.4.1.227	RXN-8976	1.0 UDP-N-ACETYL-D-GLUCOSAMINE + 1.0 C4 -> 1.0 UDP + 1.0 CPD-7695
2.4.1.227	RXN-11346	1.0 UDP-N-ACETYL-D-GLUCOSAMINE + 1.0 CPD-12303 -> 1.0 UDP + 1.0 CPD-12304
2.4.1.227	NACGLCTRANS-RXN	1.0 UDP-N-ACETYL-D-GLUCOSAMINE + 1.0 C5 <> 1.0 UDP + 1.0 C6
2.4.1.227	RXN-11029	1.0 UDP-N-ACETYL-D-GLUCOSAMINE + 1.0 CPD-11997 -> 1.0 UDP + 1.0 CPD-11998
1.6.2.4	NADPH--FERRIHEMOPROTEIN-REDUCTASE-RXN	1.0 NADPH + 1.0 Oxidized-hemoproteins -> 1.0 Reduced-hemoproteins + 1.0 NADP
3.6.5.5	3.6.5.5-RXN	1.0 GTP -> 1.0 GDP + 1.0 Pi
1.3.5.2	RXN0-6491	1.0 Ubiquinones + 1.0 DI-H-OROTATE -> 1.0 Ubiquinols + 1.0 OROTATE
1.3.5.2	DIHYDROOROTATE-DEHYDROGENASE-RXN	1.0 DI-H-OROTATE + 1.0 NAD -> 1.0 OROTATE + 1.0 NADH
1.3.5.2	RXN0-6554	1.0 DI-H-OROTATE + 1.0 Menaquinones -> 1.0 OROTATE + 1.0 Menaquinols
2.3.1.158	RXN-1641	1.0 DIACYLGLYCEROL + 1.0 PHOSPHATIDYLCHOLINE -> 1.0 Triacylglycerols + 1.0 2-Lysophosphatidylcholines
2.3.1.158	2.3.1.158-RXN	1.0 DIACYLGLYCEROL + 1.0 Phospholipids -> 1.0 Triacylglycerols + 1.0 Lysophospholipids
1.6.5.2	NQOR-RXN	1.0 NADPH + 1.0 Quinones -> 1.0 NADP + 1.0 Reduced-Quinones
1.11.1.12	1.11.1.12-RXN	1.0 A-LIPID-HYDROPEROXIDE + 2.0 GLUTATHIONE -> 1.0 Lipids + 1.0 OXIDIZED-GLUTATHIONE
3.5.5.4	3.5.5.4-RXN	1.0 CPD-603 -> 1.0 L-ASPARTATE + 1.0 AMMONIA
2.1.1.125	2.1.1.125-RXN	1.0 Histone-L-arginines + 1.0 S-ADENOSYLMETHIONINE -> 1.0 Histone-N-o-methyl-arginines + 1.0 ADENOSYL-HOMO-CYS
3.5.1.98	3.5.1.98-RXN	1.0 Acetylated-histones -> 1.0 Deacetylated-histones + 1.0 CPD-567
2.7.1.133(shifted to 2.7.1.134)	2.7.1.133-RXN	1.0 INOSITOL-1-3-4-TRIPHOSPHATE + 1.0 ATP -> 1.0 ADP + 1.0 CPD-505
3.1.3.77	3.1.3.77-RXN	1.0 CPD-8999 -> 1.0 CPD-85 + 1.0 Pi
1.4.3.21	AMINEOXID-RXN	1.0 OXYGEN-MOLECULE + 1.0 Aliphatic-Amines -> 1.0 Aldehydes + 1.0 HYDROGEN-PEROXIDE + 1.0 AMMONIA
1.4.3.21	AMINEPHEN-RXN	1.0 PHENYLETHYLAMINE + 1.0 OXYGEN-MOLECULE -> 1.0 PHENYLACETALDEHYDE + 1.0 HYDROGEN-PEROXIDE + 1.0 AMMONIA
1.4.3.21	AMACETOXID-RXN	1.0 AMINO-ACETONE + 1.0 OXYGEN-MOLECULE -> 1.0 METHYL-GLYOXAL + 1.0 HYDROGEN-PEROXIDE + 1.0 AMMONIA
1.4.3.21	RXN-11784	1.0 CADAVERINE + 1.0 OXYGEN-MOLECULE -> 1.0 CPD-12763 + 1.0 HYDROGEN-PEROXIDE + 1.0 AMMONIA
2.5.1.75	RXN0-6274	1.0 CPD-4211 + 1.0 All-tRNAs -> 1.0 PPI + 1.0 tRNA-Containing-6Isopentenyladenosine
2.8.1.8	RXN0-949	2.0 CPD-7046 + 2.0 S-ADENOSYLMETHIONINE + 1.0 Octanoylated-domains -> 2.0 MET + 1.0 Lipoylated-domains + 2.0 CH33ADO
3.4.21.105	3.4.21.105-RXN	1.0 Type-1-transmemberane-domains -> 1.0 Cleaved-type-1-transmembrane-domains
1.5.3.15	RXN-10463	1.0 CPD-3462 + 1.0 OXYGEN-MOLECULE -> 1.0 CPD-313 + 1.0 HYDROGEN-PEROXIDE + 1.0 CPD-30
1.5.3.15	RXN-10747	1.0 OXYGEN-MOLECULE + 1.0 SPERMIDINE -> 1.0 CPD-313 + 1.0 HYDROGEN-PEROXIDE + 1.0 4-AMINO-BUTYRALDEHYDE
1.8.4.11	RXN-8668	1.0 Protein-L-methionine + 1.0 Ox-Thioredoxin -> 1.0 Red-Thioredoxin + 1.0 Protein-L-Methionine-S-Oxides
1.8.4.11	RXN-8669	1.0 MET + 1.0 Ox-Thioredoxin -> 1.0 CPD-8989 + 1.0 Red-Thioredoxin
4.1.99.13	RXN-10771	1.0 CPD-11657 -> 1.0 DNA-Adjacent-Pyrimidines
3.1.3.25	RXN-10954	1.0 CPD-6702 -> 1.0 Pi + 1.0 MYO-INOSITOL
3.1.3.25	RXN-10949	1.0 Myo-inositol-monophosphates -> 1.0 Pi + 1.0 MYO-INOSITOL
3.1.3.25	RXN-10952	1.0 D-MYO-INOSITOL-4-PHOSPHATE -> 1.0 Pi + 1.0 MYO-INOSITOL
3.1.3.25	RXN-10953	1.0 CPD-6701 -> 1.0 Pi + 1.0 MYO-INOSITOL
3.1.3.25	RXN0-5408	1.0 D-MYO-INOSITOL-1-MONOPHOSPHATE -> 1.0 Pi + 1.0 MYO-INOSITOL
3.1.3.25	MYO-INOSITOL-1OR-4-MONOPHOSPHATASE-RXN	1.0 1-L-MYO-INOSITOL-1-P -> 1.0 Pi + 1.0 MYO-INOSITOL
3.2.1.152	3.2.1.152-RXN	1.0 CPD-7263 -> 1.0 CPD-7265 + 1.0 CPD-7264
2.5.1.64	2.5.1.64-RXN	1.0 ISOCHORISMATE + 1.0 2-KETOGLUTARATE -> 1.0 CPD-9924 + 1.0 CARBON-DIOXIDE
1.3.1.78	1.3.1.78-RXN	1.0 NADP + 1.0 CPD-659 -> 1.0 NADPH + 1.0 TYR + 1.0 CARBON-DIOXIDE
1.6.4.4	1.6.4.4-RXN	1.0 Protein-Dithiols + 1.0 NADP <> 1.0 NADPH + 1.0 Protein-Disulfides
2.6.1.83	RXN-7737	1.0 GLT + 1.0 DELTA{1}-PIPERIDEINE-2-6-DICARBOXYLATE -> 1.0 2-KETOGLUTARATE + 1.0 LL-DIAMINOPIMELATE
1.8.4.12	1.8.4.12-RXN	1.0 Protein-L-methionine + 1.0 Ox-Thioredoxin -> 1.0 Protein-L-methionine-R-S-oxides + 1.0 Red-Thioredoxin
2.3.1.199	RXN-9632	1.0 MALONYL-COA + 1.0 Palmitoyl-ACPs -> 1.0 CO-A + 1.0 3-oxo-stearoyl-ACPs + 1.0 CARBON-DIOXIDE
2.3.1.199	RXN0-6512	1.0 CO-A + 1.0 CPD0-2364 -> 1.0 CPD0-2365 + 1.0 ACETYL-COA
2.4.1.34	13-BETA-GLUCAN-SYNTHASE-RXN	1.0 UDP-GLUCOSE -> 1.0 UDP + 1.0 1-3-beta-D-Glucans
2.5.1.60	RXN-3701	1.0 PROT-CYS + 1.0 GERANYLGERANYL-PP -> 1.0 PPI + 1.0 S-GERANYLGERANYL-PROTEIN
2.5.1.60	2.5.1.60-RXN	1.0 PROT-CYS + 2.0 GERANYLGERANYL-PP -> 2.0 PPI + 2.0 S-GERANYLGERANYL-PROTEIN
2.6.1.4	per_GLYCINEAMINOTRANSFERASERXN	1.0 per_GLT + 1.0 per_GLYOX -> 1.0 per_2-KETOGLUTARATE + 1.0 per_GLY
2.6.1.45	per_SERINEGLYOXYLATEAMINOTRANSFERASERXN	1.0 per_SER + 1.0 per_GLYOX -> 1.0 per_OH-PYR + 1.0 per_GLY
1.3.8.4	ISOVALERYL-COA-FAD-RXN	1.0 ISOVALERYL-COA + 1.0 FAD -> 1.0 3-METHYL-CROTONYL-COA + 1.0 FADH2
3.4.19.12	3.4.19.12-RXN	1.0 Ubiquitin-C-terminal-thioesters -> 1.0 Thiols + 1.0 Ubiquitins
2.1.1.100	2.1.1.100-RXN	1.0 PROTEIN-C-TERMINAL-S-ETC-CYSTEINE + 1.0 S-ADENOSYLMETHIONINE -> 1.0 PROTEIN-C-TERMINAL-S-FARNESYL-L-CYSTEINE + 1.0 ADENOSYL-HOMO-CYS
1.4.3.22	1.4.3.22-Rxn	1.0 OXYGEN-MOLECULE + 1.0 CPD-313 -> 1.0 CPD-6082 + 1.0 HYDROGEN-PEROXIDE + 1.0 AMMONIA
2.8.1.7	RXN0-308	1.0 CYS + 1.0 PROT-CYS -> 1.0 ENZYME-S-SULFANYLCYSTEINE + 1.0 L-ALPHA-ALANINE
2.3.1.15	RXN-1381	1.0 Fatty-Acyl-CoA + 1.0 GLYCEROL-3P -> 1.0 CO-A + 1.0 ACYL-SN-GLYCEROL-3P
2.3.1.15	RXN-10462	1.0 ACYL-ACP + 1.0 GLYCEROL-3P -> 1.0 ACP + 1.0 ACYL-SN-GLYCEROL-3P
1.23.5.1	RXN-7985	1.0 CPD1F-131 + 1.0 ASCORBATE -> 1.0 L-DEHYDRO-ASCORBATE + 1.0 CPD1F-130
2.1.1.64	2.1.1.64-RXN	1.0 CPD-7158 + 1.0 S-ADENOSYLMETHIONINE -> 1.0 CPD-9957 + 1.0 ADENOSYL-HOMO-CYS
3.4.19.9	RXN-6641	1.0 S-Substituted-Glutathione -> 1.0 CPD-6262 + 1.0 GLT
3.2.2.23	RXN0-2602	1.0 Damaged-DNA -> 1.0 AP-Site-Created
3.2.2.27	RXN0-2584	1.0 DNA-with-Uracils -> 1.0 AP-Site-Created + 1.0 URACIL
1.14.11.19	1.14.11.19-RXN	1.0 OXYGEN-MOLECULE + 1.0 CPD-590 + 1.0 2-KETOGLUTARATE -> 1.0 SUC + 1.0 CARBON-DIOXIDE + 1.0 Dihydroquercetins
2.3.1.181	RXN0-947	1.0 Non-lipoylated-domains + 1.0 Octanoyl-ACPs <> 1.0 ACP + 1.0 Octanoylated-domains
2.7.11.25	2.7.11.25-RXN	1.0 mitogen-activated-protein-kinase-kinase + 1.0 ATP <> 1.0 mitogen-act-protein-kinase-kinase-P + 1.0 ADP
1.2.4.4	1.2.4.4-RXN	1.0 2-KETO-ISOVALERATE + 1.0 BCAA-dehydrogenase-lipoyl <> 1.0 BCAA-dehydrogenase-2MP-DH-lipoyl + 1.0 CARBON-DIOXIDE
1.2.4.4	METHYLVALERATE-RXN	1.0 2-KETO-3-METHYL-VALERATE + 1.0 BCAA-dehydrogenase-lipoyl -> 1.0 BCAA-dehydrogenase-2MB-DH-lipoyl + 1.0 CARBON-DIOXIDE
1.2.4.4	KETOISOCAPROATE-RXN	1.0 2K-4CH3-PENTANOATE + 1.0 BCAA-dehydrogenase-lipoyl -> 1.0 BCAA-dehydrogenase-3MB-DH-lipoyl + 1.0 CARBON-DIOXIDE
3.2.1.67	GALACTURAN-14-ALPHA-GALACTURONIDASE-RXN	1.0 14-ALPHA-D-GALACTURONIDE -> 1.0 D-GALACTURONATE
1.1.1.234	D-LACTATE-DEHYDROGENASE-CYTOCHROME-RXN	1.0 D-LACTATE + 2.0 Cytochromes-C-Oxidized -> 2.0 Cytochromes-C-Reduced + 1.0 PYRUVATE
1.1.1.234	FLAVANONE-4-REDUCTASE-RXN	1.0 CPD-2042 + 1.0 NADP -> 1.0 NADPH + 1.0 CPD-2043
4.1.99.3	DEOXYRIBODIPYRIMIDINE-PHOTOLYASE-RXN	1.0 DNA-Cyclobuta-Dipyrimidines <> 1.0 DNA-Adjacent-Pyrimidines
2.1.1.9	THIOL-S-METHYLTRANSFERASE-RXN	1.0 Thiols + 1.0 S-ADENOSYLMETHIONINE -> 1.0 Thio-Ethers + 1.0 ADENOSYL-HOMO-CYS
1.13.11.53	R146-RXN	1.0 OXYGEN-MOLECULE + 1.0 CPD-85 -> 1.0 CPD-7672 + 1.0 FORMATE + 1.0 CARBON-MONOXIDE
4.2.1.96	RXN-7908	1.0 CPD-5881 -> 1.0 BIOPTERIN
3.6.3.41	3.6.3.41-RXN	1.0 PROTOHEME_in + 1.0 ATP -> 1.0 PROTOHEME_out + 1.0 Pi + 1.0 ADP
3.6.1.13	RXN0-1441	1.0 ADENOSINE_DIPHOSPHATE_RIBOSE -> 1.0 AMP + 1.0 RIBOSE-5P
2.7.11.17	2.7.11.17-RXN	1.0 General-Protein-Substrates + 1.0 ATP -> 1.0 General-Phos-Protein-Substrates + 1.0 ADP
1.3.1.38	RXN-7711	1.0 NADP + 1.0 Long-Chain-234-Saturated-acyl-CoAs -> 1.0 NADPH + 1.0 Long-Chain-Trans-23-Dehydroacyl-CoA
2.7.1.59	N-ACETYLGLUCOSAMINE-KINASE-RXN	1.0 N-ACETYL-D-GLUCOSAMINE + 1.0 ATP -> 1.0 N-ACETYL-D-GLUCOSAMINE-6-P + 1.0 ADP
4.2.3.3	METHGLYSYN-RXN	1.0 DIHYDROXY-ACETONE-PHOSPHATE -> 1.0 Pi + 1.0 METHYL-GLYOXAL
6.2.1.13	PROPIONATE-COA-LIGASE	1.0 CO-A + 1.0 PROPIONATE + 1.0 ATP -> 1.0 PROPIONYL-COA + 1.0 PPI + 1.0 ADP
1.11.1.1	NADH-PEROXIDASE-RXN	1.0 NADH + 1.0 HYDROGEN-PEROXIDE -> 1.0 NAD
4.1.3.24	MALYL-COA-LYASE-RXN	1.0 CPD-208 -> 1.0 GLYOX + 1.0 ACETYL-COA
2.3.1.48	HISTONE-ACETYLTRANSFERASE-RXN	1.0 Histones + 1.0 ACETYL-COA -> 1.0 CO-A + 1.0 Acetylated-histones
2.1.1.43	HISTONE-LYSINE-N-METHYLTRANSFERASE-RXN	1.0 CPD-8578 + 1.0 S-ADENOSYLMETHIONINE -> 1.0 CPD-8579 + 1.0 ADENOSYL-HOMO-CYS	histone-lysine N-methyltransferase	carnitine metabolism	Sun et al., The Histone Methyltransferase SDG724 Mediates H3K36me2/3 Deposition at MADS50 and RFT1 and Promotes Flowering in Rice. Plant Cell. 2012 Aug; 24(8): 3235–3247.
2.1.1.127	2.1.1.127-RXN	1.0 RubosCO-lysine + 1.0 S-ADENOSYLMETHIONINE -> 1.0 RubisCO-N6-methyl-L-lysine + 1.0 ADENOSYL-HOMO-CYS	Ribulose-1,5 bisphosphate carboxylase/oxygenase large subunit N-methyltransferase		Mininno, Morgane, et al. "Characterization of chloroplastic fructose 1, 6-bisphosphate aldolases as lysine-methylated proteins in plants." Journal of Biological Chemistry 287.25 (2012): 21034-21044.
2.4.2.29	QUEUOSINE-TRNA-RIBOSYLTRANSFERASE-RXN	1.0 tRNA-Containing-Guanine + 1.0 QUEUINE -> 1.0 tRNA-Containing-Queuine + 1.0 GUANINE	Queuine tRNA-ribosyltransferase	queuosine biosynthesis	Walden, T. L., Howes, N., and Farkas, W. R. (1982) Purification and properties of guanine, queuine-tRNA transglycosylase from wheat germ. J. Biol. Chem. 257, 13218−13222
3.2.1.51	ALPHA-L-FUCOSIDASE-RXN	1.0 AN-ALPHA-L-FUCOSIDE -> 1.0 L-FUCOSE + 1.0 Alcohols	Alpha-L-fucosidase 2	xyloglucan metabolism	Léonard, Renaud, et al. "Identification of an Arabidopsis gene encoding a GH95 alpha1, 2-fucosidase active on xyloglucan oligo-and polysaccharides." Phytochemistry 69.10 (2008): 1983-1988.
4.2.1.122	RXN0-2382	1.0 INDOLE + 1.0 SER -> 1.0 TRP	tryptophan synthase		Yin10: Yin R, Frey M, Gierl A, Glawischnig E (2010). "Plants contain two distinct classes of functional tryptophan synthase beta proteins." Phytochemistry 71(14-15);1667-72. PMID: 20701934
1.14.19.2	RXN-7903	1.0 OXYGEN-MOLECULE + 1.0 Stearoyl-ACPs + 1.0 Reduced-ferredoxins -> 1.0 Oxidized-ferredoxins + 1.0 Oleoyl-ACPs	Stearoyl-[acyl-carrier-protein] 9-desaturase 2	repression of the salicylic acid (SA) signaling pathway	Jiang, Chang-Jie, et al. "Suppression of the rice fatty-acid desaturase gene OsSSI2 enhances resistance to blast and leaf blight diseases in rice." Molecular plant-microbe interactions 22.7 (2009): 820-829.
2.7.1.137	1-PHOSPHATIDYLINOSITOL-3-KINASE-RXN	1.0 L-1-phosphatidyl-inositols + 1.0 ATP -> 1.0 CPD-177 + 1.0 ADP	phosphatidylinositol 3-kinase	Inositol phosphate metabolism	Liu, Jian, Jun Zhou, and Da Xing. "Phosphatidylinositol 3-kinase plays a vital role in regulation of rice seed vigor via altering NADPH oxidase activity." PLoS One 7.3 (2012): e33817.
3.5.1.88	3.5.1.88-RXN	1.0 FORMYL-L-METHIONYL-PEPTIDE -> 1.0 FORMATE + 1.0 METHIONYL-PEPTIDE	peptide deformylase		Howard, Michael H., et al. "A novel class of inhibitors of peptide deformylase discovered through high-throughput screening and virtual ligand screening." Journal of medicinal chemistry 47.27 (2004): 6669-6672.
2.7.13.3	2.7.13.3-RXN	1.0 Protein-Histidines + 1.0 ATP <> 1.0 ADP + 1.0 Protein-phospho-L-histidines	histidine kinase	cytokinin-activated signaling pathway	Choi, Jaemyung, et al. "Functional identification of OsHk6 as a homotypic cytokinin receptor in rice with preferential affinity for iP." Plant and Cell Physiology 53.7 (2012): 1334-1343.
2.6.1.85	PABASYN-RXN	1.0 CHORISMATE + 1.0 GLN -> 1.0 4-AMINO-4-DEOXYCHORISMATE + 1.0 GLT	aminodeoxychorismate synthase	tetrahydrofolate biosynthesis	Camara, Djeneb, et al. "The synthesis of pABA: Coupling between the glutamine amidotransferase and aminodeoxychorismate synthase domains of the bifunctional aminodeoxychorismate synthase from Arabidopsis thaliana." Archives of biochemistry and biophysics 505.1 (2011): 83-90.
2.7.11.2	2.7.11.2-RXN	1.0 ATP + 1.0 Pyruvate-dehydrogenases -> 1.0 Phosphorylated-pyruvate-dehydrogenases + 1.0 ADP	pyruvate dehydrogenase (acetyl-transferring)] kinase		Schuller, K. A., & Randall, D. D. (1990). Mechanism of pyruvate inhibition of plant pyruvate dehydrogenase kinase and synergism with ADP. Archives of biochemistry and biophysics, 278(1), 211-216.
#more reactions added to complete JA syn pathway #20/6/17 from Ricecyc/Metacyc
4.2.1.92	ALLENE-OXIDE-SYNTHASE-RXN	1/1 "13-HYDROPEROXYOCTADECA-911-DIENOATE" -> 1/1 "12,13(S)-epoxylinolenate"	ALLENE-OXIDE-SYNTHASE
5.3.99.6	ALLENE-OXIDE-CYCLASE-RXN	1/1 "12,13(S)-epoxylinolenate" -> 1/1 "12-oxo-cis-10,15-phytodienoate"	ALLENE-OXIDE-CYCLASE
1.31.4.2	12-OXOPHYTODIENOATE-REDUCTASE-RXN	1/1 "12-oxo-cis-10,15-phytodienoate" + 1/1 "NADPH" -> 1/1 "3-oxo-2-(cis-2'-pentenyl)-cyclopentane-1-octanoate" + 1/1 "NADP"	12-oxophytodienoate reductase
	ISOJASMONATE-RXN	1/1 "3-oxo-2-(cis-2'-pentenyl)-cyclopentane-1-octanoate" + 3/1 "OXYGEN-MOLECULE" -> 1/1 "7-isojasmonate" + 3/1 "ACET"
	JASMONATE-SYN-RXN	1/1 "7-isojasmonate" -> 1/1 "Jasmonate"
#for fatty acid beta oxidation
1.1.1.35	3-HYDROXYACYL-COA-DEHYDROGENASE-RXN	1.0 "D-3-HYDROXYACYL-COA" + 1/1 "NAD" <> 1.0 "CPD-11524" + 1/1 "NADH"	3-hydroxyacyl-CoA dehydrogenase
	RXN0-2044
	S-2-HYDROXY-ACID-OXIDASE-RXN
	RXN-10703
	GCVP-RXN
	RXN-4142
	DCMP-DEAMINASE-RXN
	RXN-9290
	GLYMALTOPHOSPHORYL-RXN
	1.18.1.2-RXN
	2OXOGLUTDECARB-RXN
	RXN-6222
	RXN-9023
	RXN-10715
	RXN-10702
	RXN-10780
	RXN-11026
	GSHTRAN-RXN
	RXN3O-4113
	NADH-DEHYDROGENASE-QUINONE-RXN
	UDPREDUCT-RXN
	RXN-9583
	RXN0-5364
	RXN-10915
	OHACYL-COA-DEHYDROG-RXN
	RXN-8999
	RXN-11370
	CDPREDUCT-RXN
	RXN-10911
	RXN-37
	RXN-1826
	RXN-11503
	ADPREDUCT-RXN
	RXN1F-66
	RXN-10089
	RXN-9758
	RXN-7788
	RXN-10912
	RXN0-5260
	per_GLUTATHIONE-REDUCT-NADH-RXN
	FAD_reduction_RXN
