# Supplementary material for: Reconstruction of Oryza sativa indica Genome Scale Metabolic Model and Its Responses to Varying RuBisCO Activity, Light Intensity, and Enzymatic Cost Conditions
Source: Front Plant Sci. 2017 Nov 30;8:2060. doi: 10.3389/fpls.2017.02060 (PMC5715477; doi:10.3389/fpls.2017.02060)
Supplement: Supplementary file 7 [file Data_Sheet_5.XLS]

## Sheet: Sheet1
FBAval : flux values that were obtained from FBA analysis
FVAmin : minimum flux value from FVA analysis
FVAmax : maximum flux value from FVA analysis
		The computed optimal value of the objective function is kept fixed.			The computed optimal value of the objective function is kept fixed.		Primary objective function set at 1.5 times of the computed optimal value
	Vc/V0 =1:1	Vc/V0 =1:1	Vc/V0 =1:1	Vc/V0 =3:1	Vc/V0 =3:1	Vc/V0 =3:1	Vc/V0 =1:1	Vc/V0 =1:1	Vc/V0 =3:1	Vc/V0 =3:1
Reaction name	FBAval	FVAmin	FVAmax	FBAval	FVAmin	FVAmax	FVAmin	FVAmax	FVAmin	FVAmax
1.18.1.2-RXN	-2.81329e-05	-2.81329e-05	-2.81329e-05	-2.81329e-05	-2.81329e-05	-2.81329e-05	-0.12532	-2.81329e-05	-0.0636158	-2.81329e-05
1.2.1.9-RXN	0.00205017	0.00205017	0.00205017	0.00205017	0.00205017	0.00205017	0	0.127342	0	0.0656378
1.3.1.78-RXN	8.5821e-06	8.5821e-06	8.5821e-06	8.5821e-06	8.5821e-06	8.5821e-06	8.5821e-06	8.5821e-06	8.5821e-06	8.5821e-06
1.5.1.20-RXN	-0.000253663	-0.000253663	-0.000253663	-0.000253663	-0.000253663	-0.000253663	-0.000253663	-0.000253663	-0.000253663	-0.000253663
1.8.4.9-RXN	-9.37762e-06	-9.37762e-06	-9.37762e-06	-9.37762e-06	-9.37762e-06	-9.37762e-06	-9.37762e-06	-9.37762e-06	-9.37762e-06	-9.37762e-06
2-ISOPROPYLMALATESYN-RXN	2.63391e-05	2.63391e-05	2.63391e-05	2.63391e-05	2.63391e-05	2.63391e-05	2.63391e-05	2.63391e-05	2.63391e-05	2.63391e-05
2.5.1.19-RXN	0.000302115	0.000302115	0.000302115	0.000302115	0.000302115	0.000302115	0.000302115	0.000302115	0.000302115	0.000302115
2.6.1.18-RXN	5.61205e-06	5.61205e-06	5.61205e-06	5.61205e-06	5.61205e-06	5.61205e-06	5.61205e-06	5.61205e-06	5.61205e-06	5.61205e-06
2PGADEHYDRAT-RXN	0.00144942	0.00144942	0.00144942	0.00144942	0.00144942	0.00144942	-0.304794	0.312747	-0.157419	0.167756
3-DEHYDROQUINATE-DEHYDRATASE-RXN	0.000302115	0.000302115	0.000302115	0.000302115	0.000302115	0.000302115	0.000302115	0.000302115	0.000302115	0.000302115
3-DEHYDROQUINATE-SYNTHASE-RXN	0.000302115	0.000302115	0.000302115	0.000302115	0.000302115	0.000302115	0.000302115	0.000302115	0.000302115	0.000302115
3-HYDROXYPROPIONATE-DEHYDROGENASE-RXN	5.61205e-06	5.61205e-06	5.61205e-06	5.61205e-06	5.61205e-06	5.61205e-06	5.61205e-06	5.61205e-06	5.61205e-06	5.61205e-06
3-ISOPROPYLMALDEHYDROG-RXN	2.63391e-05	2.63391e-05	2.63391e-05	2.63391e-05	2.63391e-05	2.63391e-05	2.63391e-05	2.63391e-05	2.63391e-05	2.63391e-05
3-ISOPROPYLMALISOM-RXN	2.63391e-05	2.63391e-05	2.63391e-05	2.63391e-05	2.63391e-05	2.63391e-05	2.63391e-05	2.63391e-05	2.63391e-05	2.63391e-05
3PGAREARR-RXN	0.00144942	0.00144942	0.00144942	0.00144942	0.00144942	0.00144942	-0.304794	0.312747	-0.157419	0.167756
4-COUMARATE--COA-LIGASE-RXN	0.000110869	0.000110869	0.000110869	0.000110869	0.000110869	0.000110869	0.000110869	0.000110869	0.000110869	0.000110869
ACETOLACTREDUCTOISOM-RXN	-3.52083e-05	-3.52083e-05	-3.52083e-05	-3.52083e-05	-3.52083e-05	-3.52083e-05	-3.52083e-05	-3.52083e-05	-3.52083e-05	-3.52083e-05
ACETOLACTSYN-RXN	3.52083e-05	3.52083e-05	3.52083e-05	3.52083e-05	3.52083e-05	3.52083e-05	3.52083e-05	3.52083e-05	3.52083e-05	3.52083e-05
ACETOOHBUTREDUCTOISOM-RXN	1.33601e-05	1.33601e-05	1.33601e-05	1.33601e-05	1.33601e-05	1.33601e-05	1.33601e-05	1.33601e-05	1.33601e-05	1.33601e-05
ACETOOHBUTSYN-RXN	1.33601e-05	1.33601e-05	1.33601e-05	1.33601e-05	1.33601e-05	1.33601e-05	1.33601e-05	1.33601e-05	1.33601e-05	1.33601e-05
ACETYL_COA_SYN	9.37763e-06	9.37763e-06	9.37763e-06	9.37763e-06	9.37763e-06	9.37763e-06	9.37763e-06	9.37763e-06	9.37763e-06	9.37763e-06
ACSERLY-RXN	9.37763e-06	9.37763e-06	9.37763e-06	9.37763e-06	9.37763e-06	9.37763e-06	9.37763e-06	9.37763e-06	9.37763e-06	9.37763e-06
ADENOSINE-KINASE-RXN	0.000252188	0.000252188	0.000252188	0.000252188	0.000252188	0.000252188	0.000252188	0.203569	0.000252188	0.104862
ADENOSYLHOMOCYSTEINASE-RXN	0.000252188	0.000252188	0.000252188	0.000252188	0.000252188	0.000252188	0.000252188	0.0918018	0.000252188	0.0473562
ADENYL-KIN-RXN	-0.00307104	-0.00307104	-0.00307104	-0.00307104	-0.00307104	-0.00307104	-0.117775	0.165258	-0.062101	0.0844062
ADENYLOSUCCINATE-SYNTHASE-RXN	1.28199e-05	1.28199e-05	1.28199e-05	1.28199e-05	1.28199e-05	1.28199e-05	1.28199e-05	0.0955651	1.28199e-05	0.0523178
ADPREDUCT-RXN	-3.77388e-06	-3.77388e-06	-3.77388e-06	-3.77388e-06	-3.77388e-06	-3.77388e-06	-3.77388e-06	-3.77388e-06	-3.77388e-06	-3.77388e-06
AICARSYN-RXN	1.44153e-05	1.44153e-05	1.44153e-05	1.44153e-05	1.44153e-05	1.44153e-05	1.44153e-05	1.44153e-05	1.44153e-05	1.44153e-05
AICARTRANSFORM-RXN	1.98613e-05	1.98613e-05	1.98613e-05	1.98613e-05	1.98613e-05	1.98613e-05	1.98613e-05	1.98613e-05	1.98613e-05	1.98613e-05
AIRCARBOXY-RXN	-1.44153e-05	-1.44153e-05	-1.44153e-05	-1.44153e-05	-1.44153e-05	-1.44153e-05	-1.44153e-05	-1.44153e-05	-1.44153e-05	-1.44153e-05
AIRS-RXN	1.44153e-05	1.44153e-05	1.44153e-05	1.44153e-05	1.44153e-05	1.44153e-05	1.44153e-05	1.44153e-05	1.44153e-05	1.44153e-05
ALA_tx	-6.82987e-05	-6.82987e-05	-6.82987e-05	-6.82987e-05	-6.82987e-05	-6.82987e-05	-6.82987e-05	-6.82987e-05	-6.82987e-05	-6.82987e-05
ALANINE-AMINOTRANSFERASE-RXN	-7.39107e-05	-7.39107e-05	-7.39107e-05	-7.39107e-05	-7.39107e-05	-7.39107e-05	-0.326804	0.305228	-0.162266	0.157853
ALDOSE-1-EPIMERASE-RXN	1.38768e-05	1.38768e-05	1.38768e-05	1.38768e-05	1.38768e-05	1.38768e-05	1.38768e-05	0.0967939	1.38768e-05	0.049884
AMP_tx	-3.59998e-06	-3.59998e-06	-3.59998e-06	-3.59998e-06	-3.59998e-06	-3.59998e-06	-3.59998e-06	-3.59998e-06	-3.59998e-06	-3.59998e-06
AMPSYN-RXN	1.28199e-05	1.28199e-05	1.28199e-05	1.28199e-05	1.28199e-05	1.28199e-05	1.28199e-05	0.0955651	1.28199e-05	0.0523178
ANTHRANSYN-RXN	1.07723e-06	1.07723e-06	1.07723e-06	1.07723e-06	1.07723e-06	1.07723e-06	1.07723e-06	1.07723e-06	1.07723e-06	1.07723e-06
ARG_tx	-8.35524e-06	-8.35524e-06	-8.35524e-06	-8.35524e-06	-8.35524e-06	-8.35524e-06	-8.35524e-06	-8.35524e-06	-8.35524e-06	-8.35524e-06
ARGSUCCINLYA-RXN	8.35524e-06	8.35524e-06	8.35524e-06	8.35524e-06	8.35524e-06	8.35524e-06	8.35524e-06	0.04416	8.35524e-06	0.0229575
ARGSUCCINSYN-RXN	8.35524e-06	8.35524e-06	8.35524e-06	8.35524e-06	8.35524e-06	8.35524e-06	8.35524e-06	0.04416	8.35524e-06	0.0229575
ASN_tx	-3.59524e-05	-3.59524e-05	-3.59524e-05	-3.59524e-05	-3.59524e-05	-3.59524e-05	-3.59524e-05	-3.59524e-05	-3.59524e-05	-3.59524e-05
ASNSYNB-RXN	3.59524e-05	3.59524e-05	3.59524e-05	3.59524e-05	3.59524e-05	3.59524e-05	3.59524e-05	3.59524e-05	3.59524e-05	3.59524e-05
ASP_tx	-3.56864e-05	-3.56864e-05	-3.56864e-05	-3.56864e-05	-3.56864e-05	-3.56864e-05	-3.56864e-05	-3.56864e-05	-3.56864e-05	-3.56864e-05
ASPAMINOTRANS-RXN	-0.000172279	-0.000172279	-0.000172279	-0.000172279	-0.000172279	-0.000172279	-0.0957246	-0.000172279	-0.0524773	-0.000172279
ASPARTATE-SEMIALDEHYDE-DEHYDROGENASE-RXN	-4.93783e-05	-4.93783e-05	-4.93783e-05	-4.93783e-05	-4.93783e-05	-4.93783e-05	-4.93783e-05	-4.93783e-05	-4.93783e-05	-4.93783e-05
ASPARTATEKIN-RXN	4.93783e-05	4.93783e-05	4.93783e-05	4.93783e-05	4.93783e-05	4.93783e-05	4.93783e-05	4.93783e-05	4.93783e-05	4.93783e-05
ASPCARBTRANS-RXN	1.56719e-05	1.56719e-05	1.56719e-05	1.56719e-05	1.56719e-05	1.56719e-05	1.56719e-05	1.56719e-05	1.56719e-05	1.56719e-05
ATP-CITRATE-PRO-S--LYASE-RXN	0.000347252	0.000347252	0.000347252	0.000347252	0.000347252	0.000347252	0.000347252	0.000347252	0.000347252	0.000347252
ATPase	0.1	0.1	0.1	0.1	0.1	0.1	0.1	0.1	0.1	0.1
ATPPHOSPHORIBOSYLTRANS-RXN	-5.44606e-06	-5.44606e-06	-5.44606e-06	-5.44606e-06	-5.44606e-06	-5.44606e-06	-5.44606e-06	-5.44606e-06	-5.44606e-06	-5.44606e-06
B_ALA_tx	-5.61205e-06	-5.61205e-06	-5.61205e-06	-5.61205e-06	-5.61205e-06	-5.61205e-06	-5.61205e-06	-5.61205e-06	-5.61205e-06	-5.61205e-06
BRANCHED-CHAINAMINOTRANSFERILEU-RXN	-1.33601e-05	-1.33601e-05	-1.33601e-05	-1.33601e-05	-1.33601e-05	-1.33601e-05	-1.33601e-05	-1.33601e-05	-1.33601e-05	-1.33601e-05
BRANCHED-CHAINAMINOTRANSFERLEU-RXN	-2.63391e-05	-2.63391e-05	-2.63391e-05	-2.63391e-05	-2.63391e-05	-2.63391e-05	-2.63391e-05	-2.63391e-05	-2.63391e-05	-2.63391e-05
BRANCHED-CHAINAMINOTRANSFERVAL-RXN	-8.8692e-06	-8.8692e-06	-8.8692e-06	-8.8692e-06	-8.8692e-06	-8.8692e-06	-8.8692e-06	-8.8692e-06	-8.8692e-06	-8.8692e-06
CAFFEOYL-COA-O-METHYLTRANSFERASE-RXN	0.000171595	0.000171595	0.000171595	0.000171595	0.000171595	0.000171595	0.000171595	0.000171595	0.000171595	0.000171595
CARBOXYCYCLOHEXADIENYL-DEHYDRATASE-RXN	0.000292456	0.000292456	0.000292456	0.000292456	0.000292456	0.000292456	0.000292456	0.458208	0.000292456	0.237145
CARBPSYN-RXN	2.40271e-05	2.40271e-05	2.40271e-05	2.40271e-05	2.40271e-05	2.40271e-05	2.40271e-05	0.0441757	2.40271e-05	0.0229732
CDPKIN-RXN	-1.18161e-05	-1.18161e-05	-1.18161e-05	-1.18161e-05	-1.18161e-05	-1.18161e-05	-1.18161e-05	-1.18161e-05	-1.18161e-05	-1.18161e-05
CDPREDUCT-RXN	-7.94846e-06	-7.94846e-06	-7.94846e-06	-7.94846e-06	-7.94846e-06	-7.94846e-06	-0.457924	-7.94846e-06	-0.236861	-7.94846e-06
CEL_tx	-0.00305289	-0.00305289	-0.00305289	-0.00305289	-0.00305289	-0.00305289	-0.00305289	-0.00305289	-0.00305289	-0.00305289
CELLULOSE-SYNTHASE-UDP-FORMING-RXN	0.00305289	0.00305289	0.00305289	0.00305289	0.00305289	0.00305289	0.00305289	0.00305289	0.00305289	0.00305289
chl_271148RXN	5.576e-06	5.576e-06	5.576e-06	5.576e-06	5.576e-06	5.576e-06	5.576e-06	5.576e-06	5.576e-06	5.576e-06
chl_27760RXN	5.576e-06	5.576e-06	5.576e-06	5.576e-06	5.576e-06	5.576e-06	5.576e-06	5.576e-06	5.576e-06	5.576e-06
chl_61118RXN	1.1152e-05	1.1152e-05	1.1152e-05	1.1152e-05	1.1152e-05	1.1152e-05	1.1152e-05	1.1152e-05	1.1152e-05	1.1152e-05
CHL_A_tx	-1.394e-06	-1.394e-06	-1.394e-06	-1.394e-06	-1.394e-06	-1.394e-06	-1.394e-06	-1.394e-06	-1.394e-06	-1.394e-06
chl_Add	0.0514869	0.0514869	0.0514869	0.0102974	0.0102974	0.0102974	0.0514869	0.0851879	0.0102974	0.0220942
chl_ADENYLKINRXN	1.1152e-05	1.1152e-05	1.1152e-05	1.1152e-05	1.1152e-05	1.1152e-05	1.1152e-05	1.1152e-05	1.1152e-05	1.1152e-05
chl_Ald1	0.0377379	0.0377379	0.0377379	0.0171431	0.0171431	0.0171431	0	0.175992	0	0.0891566
chl_Ald2	0.0342361	0.0342361	0.0342361	0.0136413	0.0136413	0.0136413	-2.30486e-17	0.147773	0	0.070883
chl_AMMONA_tx	0.0261727	0.0261727	0.0261727	0.00557799	0.00557799	0.00557799	-0.000653291	0.308515	-0.000653291	0.153782
chl_ammonia_tx	0.000647715	0	0.000647715	0.000647715	0.000647715	0.000647715	0	0.000647715	0	0.000647715
chl_CDPKINRXN	5.576e-06	5.576e-06	5.576e-06	5.576e-06	5.576e-06	5.576e-06	5.576e-06	5.576e-06	5.576e-06	5.576e-06
chl_CMPKIRXN	5.576e-06	5.576e-06	5.576e-06	5.576e-06	5.576e-06	5.576e-06	5.576e-06	5.576e-06	5.576e-06	5.576e-06
chl_CO2_tx	0.0514841	0.0514841	0.0514841	0.0308893	0.0308893	0.0308893	0.0514841	0.0851851	0.0308893	0.0662799
chl_DHAP_tx	-2.75227e-05	-2.75227e-05	7.81705e-15	-2.75227e-05	-2.75227e-05	1.27994e-16	-0.489215	0.493908	-0.261432	0.252251
chl_DXPREDISOMRXN	-5.576e-06	-5.576e-06	-5.576e-06	-5.576e-06	-5.576e-06	-5.576e-06	-5.576e-06	-5.576e-06	-5.576e-06	-5.576e-06
chl_DXSRXN	5.576e-06	5.576e-06	5.576e-06	5.576e-06	5.576e-06	5.576e-06	5.576e-06	5.576e-06	5.576e-06	5.576e-06
chl_E4P_tx	-0.000302115	-0.000302115	-0.000302115	-0.000302115	-0.000302115	-0.000302115	-0.227579	0.23459	-0.114793	0.116111
chl_FARNESYLTRANSTRANSFERASERXN	1.394e-06	1.394e-06	1.394e-06	1.394e-06	1.394e-06	1.394e-06	1.394e-06	1.394e-06	1.394e-06	1.394e-06
chl_FBPase	0.0377379	0.0377379	0.0377379	0.0171431	0.0171431	0.0171431	0	0.175992	0	0.0891566
chl_FPPSYNRXN	1.394e-06	1.394e-06	1.394e-06	1.394e-06	1.394e-06	1.394e-06	1.394e-06	1.394e-06	1.394e-06	1.394e-06
chl_G1P_ADPTrans	0.000124891	0.000124891	0.000124891	0.000124891	0.000124891	0.000124891	0.000111014	0.281919	0.000111014	0.147781
chl_G3Pdh	0.18059	0.18059	0.18059	0.0960159	0.0960159	0.0960159	0.18059	0.381881	0.0776165	0.216499
chl_G6P_tx	-0.0030748	-0.0030748	-0.0030748	-0.0030748	-0.0030748	-0.0030748	-0.194749	0.221157	-0.0993358	0.112116
chl_GAP_tx	-0.002071	-0.002071	-0.002071	-0.0204704	-0.0204704	-0.0204704	-0.55681	0.456891	-0.298871	0.226629
chl_Gln_Glt_tx	0.000152509	0.000152509	0.000152509	0.000152509	0.000152509	0.000152509	-0.0926766	0.281947	-0.0401798	0.147809
chl_GLUTAMATESYN	0.0266735	0.0266735	0.0266735	0.00607877	0.00607877	0.00607877	0	0.122226	0	0.0583838
chl_GLUTAMINESYN	0.026826	0.026826	0.026826	0.00623128	0.00623128	0.00623128	0	0.30862	0	0.153888
chl_GLUTRNAREDUCTRXN	-1.1152e-05	-1.1152e-05	-1.1152e-05	-1.1152e-05	-1.1152e-05	-1.1152e-05	-1.1152e-05	-1.1152e-05	-1.1152e-05	-1.1152e-05
chl_GLY3KINRXN	0.0257434	0.0257434	0.0257434	0.00514869	0.00514869	0.00514869	0.0257434	0.0425939	0.00514869	0.0110471
chl_GPPSYNRXN	1.394e-06	1.394e-06	1.394e-06	1.394e-06	1.394e-06	1.394e-06	1.394e-06	1.394e-06	1.394e-06	1.394e-06
chl_GSAAMINOTRANSRXN	1.1152e-05	1.1152e-05	1.1152e-05	1.1152e-05	1.1152e-05	1.1152e-05	1.1152e-05	1.1152e-05	1.1152e-05	1.1152e-05
chl_ISPH2RXNNADP	4.182e-06	4.182e-06	4.182e-06	4.182e-06	4.182e-06	4.182e-06	-0.610553	0.61056	-0.315803	0.315809
chl_LightCyc	0.00364328	0.00364328	0.00364328	0	0	0	0	0.0590404	0	0
chl_LightNonCyc	0.0698753	0.0698753	0.0698753	0.0330557	0.0330557	0.0330557	0.0590198	0.111996	0.0237145	0.0541125
chl_Mal2OG_tx	0.0266735	0.0266735	0.0266735	0.00607877	0.00607877	0.00607877	0.0266735	0.122226	0.00607877	0.0583838
chl_MalDH	0.0372498	0.0372498	0.0372498	0.0135501	0.0135501	0.0135501	-0.205183	0.154549	-0.140818	0.0871919
chl_MalGLT_tx	-0.0266624	-0.0266624	-0.0266624	-0.00606762	-0.00606762	-0.00606762	-0.122215	-0.0266624	-0.0583726	-0.00606762
chl_MalOxAc_tx	0.0372498	0.0372498	0.0372498	0.0135501	0.0135501	0.0135501	-0.205183	0.154549	-0.140818	0.0871919
chl_O2_tx	-0.0707873	-0.0707873	-0.0707873	-0.0475424	-0.0475424	-0.0475424	-0.135525	-0.0517901	-0.0796024	-0.0311953
chl_OHMETHYLBILANESYNRXN	1.394e-06	1.394e-06	1.394e-06	1.394e-06	1.394e-06	1.394e-06	1.394e-06	1.394e-06	1.394e-06	1.394e-06
chl_PG_rxn	0.0514869	0.0514869	0.0514869	0.0102974	0.0102974	0.0102974	0.0514869	0.0851879	0.0102974	0.0220942
chl_PGA_tx	0.000386185	0.000386185	0.000386185	0.0187856	0.0187856	0.0187856	-0.30502	0.330259	-0.145378	0.186249
chl_PGI	0.00319969	0.00319969	0.00319969	0.00319969	0.00319969	0.00319969	-0.221034	0.19486	-0.111993	0.099448
chl_PGK	0.18059	0.18059	0.18059	0.0960159	0.0960159	0.0960159	0.18059	0.381881	0.0776165	0.216499
chl_PGM	0.000124891	0.000111014	0.000124891	0.000124891	0.000111014	0.000124891	0.000111014	0.100398	0.000111014	0.0527718
chl_Photon_tx	1.02926	1.02926	1.02926	0.46278	0.46278	0.46278	1.00134	1.73182	0.462765	0.821456
chl_PORPHOBILSYNTHRXN	5.576e-06	5.576e-06	5.576e-06	5.576e-06	5.576e-06	5.576e-06	5.576e-06	5.576e-06	5.576e-06	5.576e-06
chl_PPase	0.000147195	0.000147195	0.000147195	0.000147195	0.000147195	0.000147195	0.000133318	0.281942	0.000133318	0.147803
chl_PROTOPORGENOXIRXN	6.97e-07	6.97e-07	6.97e-07	6.97e-07	6.97e-07	6.97e-07	6.97e-07	6.97e-07	6.97e-07	6.97e-07
chl_PYR_tx	1.6728e-05	1.6728e-05	1.6728e-05	1.6728e-05	1.6728e-05	1.6728e-05	-0.159308	1.6728e-05	-0.0770329	1.6728e-05
chl_PyrNADPH	1.1152e-05	1.1152e-05	1.1152e-05	1.1152e-05	1.1152e-05	1.1152e-05	1.1152e-05	1.1152e-05	1.1152e-05	1.1152e-05
chl_R5Piso	0.0341995	0.0341995	0.0341995	0.0136047	0.0136047	0.0136047	-0.143273	0.232334	-0.0810378	0.112631
chl_Ru5P_tx	-3.66105e-05	-3.66105e-05	-3.66105e-05	-3.66105e-05	-3.66105e-05	-3.66105e-05	-0.221198	0.232334	-0.115719	0.112631
chl_Ru5Pk	0.102974	0.102974	0.102974	0.0411895	0.0411895	0.0411895	0.102974	0.170376	0.0411895	0.0883769
chl_RXN01461	1.394e-06	1.394e-06	1.394e-06	1.394e-06	1.394e-06	1.394e-06	1.394e-06	1.394e-06	1.394e-06	1.394e-06
chl_RXN0302	5.576e-06	5.576e-06	5.576e-06	5.576e-06	5.576e-06	5.576e-06	5.576e-06	5.576e-06	5.576e-06	5.576e-06
chl_RXN0882	-5.576e-06	-5.576e-06	-5.576e-06	-5.576e-06	-5.576e-06	-5.576e-06	-5.576e-06	-5.576e-06	-5.576e-06	-5.576e-06
chl_RXN0884NADP	1.394e-06	1.394e-06	1.394e-06	1.394e-06	1.394e-06	1.394e-06	-0.610554	0.610559	-0.315803	0.315808
chl_RXN1F10	1.394e-06	1.394e-06	1.394e-06	1.394e-06	1.394e-06	1.394e-06	1.394e-06	1.394e-06	1.394e-06	1.394e-06
chl_RXN1F20	1.394e-06	1.394e-06	1.394e-06	1.394e-06	1.394e-06	1.394e-06	1.394e-06	1.394e-06	1.394e-06	1.394e-06
chl_RXN1F66	1.394e-06	1.394e-06	1.394e-06	1.394e-06	1.394e-06	1.394e-06	1.394e-06	1.394e-06	1.394e-06	1.394e-06
chl_RXN1F72	1.394e-06	1.394e-06	1.394e-06	1.394e-06	1.394e-06	1.394e-06	1.394e-06	1.394e-06	1.394e-06	1.394e-06
chl_RXN5282	1.394e-06	1.394e-06	1.394e-06	1.394e-06	1.394e-06	1.394e-06	1.394e-06	1.394e-06	1.394e-06	1.394e-06
chl_RXN5283	1.394e-06	1.394e-06	1.394e-06	1.394e-06	1.394e-06	1.394e-06	1.394e-06	1.394e-06	1.394e-06	1.394e-06
chl_RXN5284	1.394e-06	1.394e-06	1.394e-06	1.394e-06	1.394e-06	1.394e-06	1.394e-06	1.394e-06	1.394e-06	1.394e-06
chl_RXN7658	1.394e-06	1.394e-06	1.394e-06	1.394e-06	1.394e-06	1.394e-06	1.394e-06	1.394e-06	1.394e-06	1.394e-06
chl_RXN7659	1.394e-06	1.394e-06	1.394e-06	1.394e-06	1.394e-06	1.394e-06	1.394e-06	1.394e-06	1.394e-06	1.394e-06
chl_RXN7660	1.394e-06	1.394e-06	1.394e-06	1.394e-06	1.394e-06	1.394e-06	1.394e-06	1.394e-06	1.394e-06	1.394e-06
chl_RXNMGPROTOPORPHYRINMETHYLESTERSYN	1.394e-06	1.394e-06	1.394e-06	1.394e-06	1.394e-06	1.394e-06	1.394e-06	1.394e-06	1.394e-06	1.394e-06
chl_S1_tx	1.394e-06	1.394e-06	1.394e-06	1.394e-06	1.394e-06	1.394e-06	1.394e-06	1.394e-06	1.394e-06	1.394e-06
chl_S2_tx	1.394e-06	1.394e-06	1.394e-06	1.394e-06	1.394e-06	1.394e-06	1.394e-06	1.394e-06	1.394e-06	1.394e-06
chl_SBPase	0.0342361	0.0342361	0.0342361	0.0136413	0.0136413	0.0136413	0	0.147773	0	0.070883
chl_Star_tx	0.000124891	0.000111014	0.000124891	0.000124891	0.000111014	0.000124891	0.000111014	0.100398	0.000111014	0.0527718
chl_StSynth	0.000124891	0.000111014	0.000124891	0.000124891	0.000111014	0.000124891	0.000111014	0.281919	0.000111014	0.147781
chl_TKL1	0.0345382	0.0345382	0.0345382	0.0139434	0.0139434	0.0139434	-0.161118	0.227579	-0.0844765	0.114793
chl_TKL2	0.0342361	0.0342361	0.0342361	0.0136413	0.0136413	0.0136413	0	0.147773	0	0.070883
chl_TPI	0.0720015	0.0719739	0.0720015	0.030812	0.0307845	0.030812	-0.422699	0.540579	-0.22223	0.281904
chl_UROGENDECARBOXRXN	1.394e-06	1.394e-06	1.394e-06	1.394e-06	1.394e-06	1.394e-06	1.394e-06	1.394e-06	1.394e-06	1.394e-06
chl_UROGENIIISYNRXN	1.394e-06	1.394e-06	1.394e-06	1.394e-06	1.394e-06	1.394e-06	1.394e-06	1.394e-06	1.394e-06	1.394e-06
chl_X5Piso	0.0687743	0.0687743	0.0687743	0.0275848	0.0275848	0.0275848	-0.129361	0.246247	-0.0714412	0.122227
CHORISMATE-SYNTHASE-RXN	0.000302115	0.000302115	0.000302115	0.000302115	0.000302115	0.000302115	0.000302115	0.000302115	0.000302115	0.000302115
CHORISMATEMUT-RXN	0.000301038	0.000301038	0.000301038	0.000301038	0.000301038	0.000301038	0.000301038	0.000301038	0.000301038	0.000301038
CMP_tx	-3.86759e-06	-3.86759e-06	-3.86759e-06	-3.86759e-06	-3.86759e-06	-3.86759e-06	-3.86759e-06	-3.86759e-06	-3.86759e-06	-3.86759e-06
CMPKI-RXN	-3.86759e-06	-3.86759e-06	-3.86759e-06	-3.86759e-06	-3.86759e-06	-3.86759e-06	-3.86759e-06	-3.86759e-06	-3.86759e-06	-3.86759e-06
CO2_tx	0.0249306	0.0249306	0.0249306	0.0249306	0.0249306	0.0249306	0.0249306	0.0249306	0.0249306	0.0249306
Conol_tx	-9.23958e-05	-9.23958e-05	-9.23958e-05	-9.23958e-05	-9.23958e-05	-9.23958e-05	-9.23958e-05	-9.23958e-05	-9.23958e-05	-9.23958e-05
Coumol_tx	-0.000110869	-0.000110869	-0.000110869	-0.000110869	-0.000110869	-0.000110869	-0.000110869	-0.000110869	-0.000110869	-0.000110869
CTPSYN-RXN	1.18161e-05	1.18161e-05	1.18161e-05	1.18161e-05	1.18161e-05	1.18161e-05	1.18161e-05	1.18161e-05	1.18161e-05	1.18161e-05
CYS_tx	-7.90316e-06	-7.90316e-06	-7.90316e-06	-7.90316e-06	-7.90316e-06	-7.90316e-06	-7.90316e-06	-7.90316e-06	-7.90316e-06	-7.90316e-06
CYSPH-RXN	1.47446e-06	1.47446e-06	1.47446e-06	1.47446e-06	1.47446e-06	1.47446e-06	1.47446e-06	1.47446e-06	1.47446e-06	1.47446e-06
CYSTATHIONINE-BETA-LYASE-RXN	1.47446e-06	1.47446e-06	1.47446e-06	1.47446e-06	1.47446e-06	1.47446e-06	1.47446e-06	1.47446e-06	1.47446e-06	1.47446e-06
DADPKIN-RXN	3.77388e-06	3.77388e-06	3.77388e-06	3.77388e-06	3.77388e-06	3.77388e-06	3.77388e-06	3.77388e-06	3.77388e-06	3.77388e-06
DAHPSYN-RXN	0.000302115	0.000302115	0.000302115	0.000302115	0.000302115	0.000302115	0.000302115	0.000302115	0.000302115	0.000302115
dAMP_tx	-3.77388e-06	-3.77388e-06	-3.77388e-06	-3.77388e-06	-3.77388e-06	-3.77388e-06	-3.77388e-06	-3.77388e-06	-3.77388e-06	-3.77388e-06
dCMP_tx	-4.06902e-06	-4.06902e-06	-4.06902e-06	-4.06902e-06	-4.06902e-06	-4.06902e-06	-4.06902e-06	-4.06902e-06	-4.06902e-06	-4.06902e-06
DCMP-DEAMINASE-RXN	3.87945e-06	3.87945e-06	3.87945e-06	3.87945e-06	3.87945e-06	3.87945e-06	3.87945e-06	3.87945e-06	3.87945e-06	3.87945e-06
DGDPKIN-RXN	-1.53223e-05	-1.53223e-05	-1.53223e-05	-1.53223e-05	-1.53223e-05	-1.53223e-05	-1.53223e-05	0.104038	-1.53223e-05	0.0534008
dGMP_tx	-3.59998e-06	-3.59998e-06	-3.59998e-06	-3.59998e-06	-3.59998e-06	-3.59998e-06	-3.59998e-06	-3.59998e-06	-3.59998e-06	-3.59998e-06
DIAMINOPIMDECARB-RXN	5.69468e-06	5.69468e-06	5.69468e-06	5.69468e-06	5.69468e-06	5.69468e-06	5.69468e-06	5.69468e-06	5.69468e-06	5.69468e-06
DIAMINOPIMEPIM-RXN	5.69468e-06	5.69468e-06	5.69468e-06	5.69468e-06	5.69468e-06	5.69468e-06	5.69468e-06	5.69468e-06	5.69468e-06	5.69468e-06
DIHYDRODIPICSYN-RXN	5.69468e-06	5.69468e-06	5.69468e-06	5.69468e-06	5.69468e-06	5.69468e-06	5.69468e-06	5.69468e-06	5.69468e-06	5.69468e-06
DIHYDROFOLATEREDUCT-RXN	-3.87945e-06	-3.87945e-06	-3.87945e-06	-3.87945e-06	-3.87945e-06	-3.87945e-06	-3.87945e-06	-3.87945e-06	-3.87945e-06	-3.87945e-06
DIHYDROOROT-RXN	-1.56719e-05	-1.56719e-05	-1.56719e-05	-1.56719e-05	-1.56719e-05	-1.56719e-05	-1.56719e-05	-1.56719e-05	-1.56719e-05	-1.56719e-05
DIHYDROOROTATE-DEHYDROGENASE-RXN	1.56719e-05	1.56719e-05	1.56719e-05	1.56719e-05	1.56719e-05	1.56719e-05	1.56719e-05	1.56719e-05	1.56719e-05	1.56719e-05
DIHYDROPICRED-RXN-(NADP)	-5.69468e-06	-5.69468e-06	-5.69468e-06	-5.69468e-06	-5.69468e-06	-5.69468e-06	-5.69468e-06	-5.69468e-06	-5.69468e-06	-5.69468e-06
DIHYDROXYISOVALDEHYDRAT-RXN	3.52083e-05	3.52083e-05	3.52083e-05	3.52083e-05	3.52083e-05	3.52083e-05	3.52083e-05	3.52083e-05	3.52083e-05	3.52083e-05
DIHYDROXYMETVALDEHYDRAT-RXN	1.33601e-05	1.33601e-05	1.33601e-05	1.33601e-05	1.33601e-05	1.33601e-05	1.33601e-05	1.33601e-05	1.33601e-05	1.33601e-05
F16ALDOLASE-RXN	-2.19107e-05	-2.19107e-05	-2.19107e-05	-2.19107e-05	-2.19107e-05	-2.19107e-05	-0.103551	0.121715	-0.054857	0.0654047
F16BDEPHOS-RXN	2.19107e-05	2.19107e-05	2.19107e-05	2.19107e-05	0	2.19107e-05	0	0.230478	0	0.11787
FA_Synth	3.5657e-05	3.5657e-05	3.5657e-05	3.5657e-05	3.5657e-05	3.5657e-05	3.5657e-05	3.5657e-05	3.5657e-05	3.5657e-05
FGAMSYN-RXN	1.44153e-05	1.44153e-05	1.44153e-05	1.44153e-05	1.44153e-05	1.44153e-05	1.44153e-05	1.44153e-05	1.44153e-05	1.44153e-05
FUMHYDR-RXN	0	0	0	-3.55904e-05	-3.55904e-05	1.35832e-15	0	0	-0.236889	0.25027
GAPOXNPHOSPHN-RXN	0	0	0	0.0183994	0.0183994	0.0183994	0	0	0	0.138875
GART-RXN	1.44153e-05	1.44153e-05	1.44153e-05	1.44153e-05	1.44153e-05	1.44153e-05	1.44153e-05	1.44153e-05	1.44153e-05	1.44153e-05
GDPKIN-RXN	2.81423e-05	2.81423e-05	2.81423e-05	2.81423e-05	0	2.81423e-05	0	0.610583	0	0.315832
GDPREDUCT-RXN	1.17224e-05	1.17224e-05	1.17224e-05	1.17224e-05	1.17224e-05	1.17224e-05	0	0.457928	0	0.236865
GLC_tx	-1.38768e-05	-1.38768e-05	-1.38768e-05	-1.38768e-05	-1.38768e-05	-1.38768e-05	-1.38768e-05	-1.38768e-05	-1.38768e-05	-1.38768e-05
GLN_tx	-3.83178e-05	-3.83178e-05	-3.83178e-05	-3.83178e-05	-3.83178e-05	-3.83178e-05	-3.83178e-05	-3.83178e-05	-3.83178e-05	-3.83178e-05
GLT_tx	-3.80616e-05	-3.80616e-05	-3.80616e-05	-3.80616e-05	-3.80616e-05	-3.80616e-05	-3.80616e-05	-3.80616e-05	-3.80616e-05	-3.80616e-05
GLUC1PURIDYLTRANS-RXN	0.0030748	0.0030748	0.0030748	0.0030748	0.0030748	0.0030748	0.0030748	0.117779	0.0030748	0.0621047
GLUTAMIDOTRANS-RXN	5.44606e-06	5.44606e-06	5.44606e-06	5.44606e-06	5.44606e-06	5.44606e-06	5.44606e-06	5.44606e-06	5.44606e-06	5.44606e-06
GLUTATHIONE-REDUCT-NADPH-RXN	9.37763e-06	9.37763e-06	9.37763e-06	9.37763e-06	9.37763e-06	9.37763e-06	9.37763e-06	9.37763e-06	9.37763e-06	9.37763e-06
GLUTKIN-RXN	1.26981e-05	1.26981e-05	1.26981e-05	1.26981e-05	1.26981e-05	1.26981e-05	1.26981e-05	1.26981e-05	1.26981e-05	1.26981e-05
GLUTSEMIALDEHYDROG-RXN	1.26981e-05	1.26981e-05	1.26981e-05	1.26981e-05	1.26981e-05	1.26981e-05	1.26981e-05	1.26981e-05	1.26981e-05	1.26981e-05
GLY_tx	-2.11611e-05	-2.11611e-05	-2.11611e-05	-2.11611e-05	-2.11611e-05	-2.11611e-05	-2.11611e-05	-2.11611e-05	-2.11611e-05	-2.11611e-05
GLYOHMETRANS-RXN	-0.000291819	-0.000291819	-0.000291819	-0.000291819	-0.000291819	-0.000291819	-0.0110678	-0.000291819	-0.016778	-0.000291819
GLYOXI-RXN	-5.61205e-06	-5.61205e-06	-5.61205e-06	-5.61205e-06	-5.61205e-06	-5.61205e-06	-5.61205e-06	-5.61205e-06	-5.61205e-06	-5.61205e-06
GLYOXII-RXN	5.61205e-06	5.61205e-06	5.61205e-06	5.61205e-06	5.61205e-06	5.61205e-06	5.61205e-06	5.61205e-06	5.61205e-06	5.61205e-06
GLYRIBONUCSYN-RXN	1.44153e-05	1.44153e-05	1.44153e-05	1.44153e-05	1.44153e-05	1.44153e-05	1.44153e-05	1.44153e-05	1.44153e-05	1.44153e-05
GMKALT-RXN	-3.59998e-06	-3.59998e-06	-3.59998e-06	-3.59998e-06	-3.59998e-06	-3.59998e-06	-3.59998e-06	-3.59998e-06	-3.59998e-06	-3.59998e-06
GMP_tx	-3.44141e-06	-3.44141e-06	-3.44141e-06	-3.44141e-06	-3.44141e-06	-3.44141e-06	-3.44141e-06	-3.44141e-06	-3.44141e-06	-3.44141e-06
GMP-SYN-GLUT-RXN	7.04139e-06	7.04139e-06	7.04139e-06	7.04139e-06	7.04139e-06	7.04139e-06	7.04139e-06	7.04139e-06	7.04139e-06	7.04139e-06
GUANYL-KIN-RXN	3.59998e-06	3.59998e-06	3.59998e-06	3.59998e-06	3.59998e-06	3.59998e-06	3.59998e-06	3.59998e-06	3.59998e-06	3.59998e-06
HIS_tx	-5.44606e-06	-5.44606e-06	-5.44606e-06	-5.44606e-06	-5.44606e-06	-5.44606e-06	-5.44606e-06	-5.44606e-06	-5.44606e-06	-5.44606e-06
HISTALDEHYD-RXN	5.44606e-06	5.44606e-06	5.44606e-06	5.44606e-06	5.44606e-06	5.44606e-06	5.44606e-06	5.44606e-06	5.44606e-06	5.44606e-06
HISTAMINOTRANS-RXN	5.44606e-06	5.44606e-06	5.44606e-06	5.44606e-06	5.44606e-06	5.44606e-06	5.44606e-06	5.44606e-06	5.44606e-06	5.44606e-06
HISTCYCLOHYD-RXN	5.44606e-06	5.44606e-06	5.44606e-06	5.44606e-06	5.44606e-06	5.44606e-06	5.44606e-06	5.44606e-06	5.44606e-06	5.44606e-06
HISTIDPHOS-RXN	5.44606e-06	5.44606e-06	5.44606e-06	5.44606e-06	5.44606e-06	5.44606e-06	5.44606e-06	5.44606e-06	5.44606e-06	5.44606e-06
HISTOLDEHYD-RXN	5.44606e-06	5.44606e-06	5.44606e-06	5.44606e-06	5.44606e-06	5.44606e-06	5.44606e-06	5.44606e-06	5.44606e-06	5.44606e-06
HISTPRATPHYD-RXN	5.44606e-06	5.44606e-06	5.44606e-06	5.44606e-06	5.44606e-06	5.44606e-06	5.44606e-06	5.44606e-06	5.44606e-06	5.44606e-06
HOMOCYSMETB12-RXN	0.000253663	0.000253663	0.000253663	0.000253663	0.000253663	0.000253663	0.000253663	0.000253663	0.000253663	0.000253663
HOMOSERDEHYDROG-RXN-(NADP)	-4.36836e-05	-4.36836e-05	-4.36836e-05	-4.36836e-05	-4.36836e-05	-4.36836e-05	-4.36836e-05	-4.36836e-05	-4.36836e-05	-4.36836e-05
HOMOSERKIN-RXN	4.36836e-05	4.36836e-05	4.36836e-05	4.36836e-05	4.36836e-05	4.36836e-05	4.36836e-05	4.36836e-05	4.36836e-05	4.36836e-05
IGPSYN-RXN	1.07723e-06	1.07723e-06	1.07723e-06	1.07723e-06	1.07723e-06	1.07723e-06	1.07723e-06	1.07723e-06	1.07723e-06	1.07723e-06
ILE_tx	-1.33601e-05	-1.33601e-05	-1.33601e-05	-1.33601e-05	-1.33601e-05	-1.33601e-05	-1.33601e-05	-1.33601e-05	-1.33601e-05	-1.33601e-05
IMIDPHOSDEHYD-RXN	5.44606e-06	5.44606e-06	5.44606e-06	5.44606e-06	5.44606e-06	5.44606e-06	5.44606e-06	5.44606e-06	5.44606e-06	5.44606e-06
IMP-DEHYDROG-RXN	7.04139e-06	7.04139e-06	7.04139e-06	7.04139e-06	7.04139e-06	7.04139e-06	7.04139e-06	7.04139e-06	7.04139e-06	7.04139e-06
IMPCYCLOHYDROLASE-RXN	-1.98613e-05	-1.98613e-05	-1.98613e-05	-1.98613e-05	-1.98613e-05	-1.98613e-05	-1.98613e-05	-1.98613e-05	-1.98613e-05	-1.98613e-05
LACCOA-RXN	5.61205e-06	5.61205e-06	5.61205e-06	5.61205e-06	5.61205e-06	5.61205e-06	5.61205e-06	5.61205e-06	5.61205e-06	5.61205e-06
LACTOYL-COA-DEHYDRATASE-RXN	5.61205e-06	5.61205e-06	5.61205e-06	5.61205e-06	5.61205e-06	5.61205e-06	5.61205e-06	5.61205e-06	5.61205e-06	5.61205e-06
LEU_tx	-2.63391e-05	-2.63391e-05	-2.63391e-05	-2.63391e-05	-2.63391e-05	-2.63391e-05	-2.63391e-05	-2.63391e-05	-2.63391e-05	-2.63391e-05
LINO_tx	-3.5657e-05	-3.5657e-05	-3.5657e-05	-3.5657e-05	-3.5657e-05	-3.5657e-05	-3.5657e-05	-3.5657e-05	-3.5657e-05	-3.5657e-05
LYS_tx	-5.69468e-06	-5.69468e-06	-5.69468e-06	-5.69468e-06	-5.69468e-06	-5.69468e-06	-5.69468e-06	-5.69468e-06	-5.69468e-06	-5.69468e-06
MALATE-DEH-RXN	-2.21103e-05	-2.21103e-05	-2.21103e-05	-0.0184215	-0.0184215	-0.0184215	-0.201305	-2.21103e-05	-0.138897	-2.21103e-05
MET_tx	-1.47446e-06	-1.47446e-06	-1.47446e-06	-1.47446e-06	-1.47446e-06	-1.47446e-06	-1.47446e-06	-1.47446e-06	-1.47446e-06	-1.47446e-06
METHENYLTHFCYCLOHYDRO-RXN	3.42766e-05	3.42766e-05	3.42766e-05	3.42766e-05	3.42766e-05	3.42766e-05	3.42766e-05	0.0108102	3.42766e-05	0.0165205
METHGLYSYN-RXN	5.61205e-06	5.61205e-06	5.61205e-06	5.61205e-06	5.61205e-06	5.61205e-06	5.61205e-06	5.61205e-06	5.61205e-06	5.61205e-06
METHYLENETHFDEHYDROG-NADP-RXN	3.42766e-05	3.42766e-05	3.42766e-05	3.42766e-05	3.42766e-05	3.42766e-05	3.42766e-05	0.0108102	3.42766e-05	0.0165205
mit_AconDHatase	0.00010023	0.00010023	0.00010023	0.00010023	0.00010023	0.00010023	0.00010023	0.00569094	0.00010023	0.00983809
mit_AconHydr	0.00010023	0.00010023	0.00010023	0.00010023	0.00010023	0.00010023	0.00010023	0.00569094	0.00010023	0.00983809
mit_AKG_tx	-0.00010023	-0.00010023	-0.00010023	-0.00010023	-0.00010023	-0.00010023	-0.00010023	-0.00010023	-0.00010023	-0.00010023
mit_am_tx	0.0258715	0.0258715	0.0258715	0.00527681	0.00527681	0.00527681	0.0258715	0.0474234	0.00527681	0.0184658
mit_ATP_tx	0.101454	0.101454	0.101454	0.0830547	0.0830547	0.0830547	0.00646789	0.27896	0.0013192	0.171983
mit_Cit_tx	-0.000347252	-0.000347252	-0.000347252	-0.000347252	-0.000347252	-0.000347252	-0.000347252	-0.000347252	-0.000347252	-0.000347252
mit_CitSynth	0.000447481	0.000447481	0.000447481	0.000447481	0.000447481	0.000447481	0.000447481	0.00603819	0.000447481	0.0101853
mit_CO2_tx	-0.0264193	-0.0264193	-0.0264193	-0.00582452	-0.00582452	-0.00582452	-0.0599635	-0.0264193	-0.0408808	-0.00582452
mit_Complex_I	0.0379945	0.0379945	0.0379945	0.0326942	0.0326942	0.0326942	0	0.145453	0	0.0898173
mit_Complex_III	0.0379945	0.0379945	0.0379945	0.0326942	0.0326942	0.0326942	0	0.108997	0	0.0682655
mit_Complex_IV	0.0189972	0.0189972	0.0189972	0.0163471	0.0163471	0.0163471	6.16298e-33	0.0544984	0	0.0341327
mit_Complex_V	0.101454	0.101454	0.101454	0.0830547	0.0830547	0.0830547	0.00646789	0.27896	0.0009347	0.171983
mit_Fum_tx	3.55904e-05	-7.10033e-15	3.55904e-05	0	0	0	-0.457916	0.463721	0	0
mit_Fumarase	3.55904e-05	-7.10033e-15	3.55904e-05	0	0	0	-0.457916	0.463721	0	0
mit_GCVMULTI	0.0258715	0.0258715	0.0258715	0.00527681	0.00527681	0.00527681	0.0258715	0.0474234	0.00527681	0.0184658
mit_GLY_tx	0.0517431	0.0517431	0.0517431	0.0105536	0.0105536	0.0105536	0.0517431	0.0948469	0.0105536	0.0369315
mit_GLYOHMETRANS	0.0258715	0.0258715	0.0258715	0.00527681	0.00527681	0.00527681	0.0258715	0.0474234	0.00527681	0.0184658
mit_IsoCitDH	0.00010023	0.00010023	0.00010023	0.00010023	0.00010023	0.00010023	0.00010023	0.00569094	0.00010023	0.00983809
mit_Mal_tx	0.0115396	0.0115396	0.0115752	0.0268697	0.0268341	0.0268697	-0.453001	0.469491	-0.223747	0.263723
mit_MalDH	0.0115752	0.0115752	0.0115752	0.0268697	0.0268697	0.0268697	-0.0490306	0.119034	-0.0211763	0.0839928
mit_O2_tx	0.0189972	0.0189972	0.0189972	0.0163471	0.0163471	0.0163471	0	0.0727266	0	0.0449087
mit_OAA_tx	-0.0111277	-0.0111277	-0.0111277	-0.0264222	-0.0264222	-0.0264222	-0.118586	0.0532466	-0.0835453	0.0258882
mit_Proton_Pi_tx	0.101454	0.101454	0.101454	0.0830547	0.0830547	0.0830547	0.00646789	0.27896	0.0013192	0.171983
mit_Pyr_tx	0.000447481	0.000447481	0.000447481	0.000447481	0.000447481	0.000447481	0.000447481	0.00603819	0.000447481	0.0101853
mit_PyrDH	0.000447481	0.000447481	0.000447481	0.000447481	0.000447481	0.000447481	0.000447481	0.00603819	0.000447481	0.0101853
mit_SER_tx	-0.0258715	-0.0258715	-0.0258715	-0.00527681	-0.00527681	-0.00527681	-0.0474234	-0.0258715	-0.0184658	-0.00527681
O2_tx	-0.0255926	-0.0255926	-0.0255926	-0.0255926	-0.0255926	-0.0255926	-0.0891687	-0.0255926	-0.0579503	-0.0255926
ORNCARBAMTRANSFER-RXN	8.35524e-06	8.35524e-06	8.35524e-06	8.35524e-06	8.35524e-06	8.35524e-06	8.35524e-06	0.04416	8.35524e-06	0.0229575
ORNITHINE-GLU-AMINOTRANSFORASE-RXN	-8.35524e-06	-8.35524e-06	-8.35524e-06	-8.35524e-06	-8.35524e-06	-8.35524e-06	-8.35524e-06	-8.35524e-06	-8.35524e-06	-8.35524e-06
OROPRIBTRANS-RXN	-1.56719e-05	-1.56719e-05	-1.56719e-05	-1.56719e-05	-1.56719e-05	-1.56719e-05	-1.56719e-05	-1.56719e-05	-1.56719e-05	-1.56719e-05
OROTPDECARB-RXN	1.56719e-05	1.56719e-05	1.56719e-05	1.56719e-05	1.56719e-05	1.56719e-05	1.56719e-05	1.56719e-05	1.56719e-05	1.56719e-05
PEPCARBOX-RXN	-0.000225767	-0.000225767	-0.000225767	-0.000225767	-0.000225767	-0.000225767	-0.203542	-0.000225767	-0.104836	-0.000225767
PEPDEPHOS-RXN	0.0031022	0.0031022	0.0031022	0.0031022	0.0031022	0.0031022	-0.165227	0.178559	-0.0843751	0.0902148
per_2KETOGLUTARATE_tx	0.0257434	0.0257434	0.0257434	0.00514869	0.00514869	0.00514869	-0.300987	0.331045	-0.157044	0.163075
per_CATRXN	0.0257434	0.0257434	0.0257434	0.00514869	0.00514869	0.00514869	0	0.0425939	0	0.0110471
per_GLT_tx	-0.0257434	-0.0257434	-0.0257434	-0.00514869	-0.00514869	-0.00514869	-0.331045	0.300987	-0.163075	0.157044
per_GLY_SER_tx	0.0257434	0.0257434	0.0257434	0.00514869	0.00514869	0.00514869	0.0257434	0.0425939	0.00514869	0.0110471
per_GLYCERATE_tx	0.0257434	0.0257434	0.0257434	0.00514869	0.00514869	0.00514869	0.0257434	0.0425939	0.00514869	0.0110471
per_GLYCERATEDEHYDROGENASERXN	0.0257434	0.0257434	0.0257434	0.00514869	0.00514869	0.00514869	0.0257434	0.0425939	0.00514869	0.0110471
per_GLYCINEAMINOTRANSFERASERXN	0.0257434	0.0257434	0.0257434	0.00514869	0.00514869	0.00514869	0	0.0425939	0	0.0110471
per_GLYCOLLATE_tx	0.0514869	0.0514869	0.0514869	0.0102974	0.0102974	0.0102974	0.0514869	0.0851879	0.0102974	0.0220942
per_Mal_tx	-0.0257434	-0.0257434	-0.0257434	-0.00514869	-0.00514869	-0.00514869	-0.110557	-0.0257434	-0.0307942	-0.00514869
per_MALATEDEHRXN	0.0257434	0.0257434	0.0257434	0.00514869	0.00514869	0.00514869	0.0257434	0.110557	0.00514869	0.0307942
per_OAA_tx	0.0257434	0.0257434	0.0257434	0.00514869	0.00514869	0.00514869	0.0257434	0.110557	0.00514869	0.0307942
per_OXYGENMOLECULE_tx	-0.0257434	-0.0257434	-0.0257434	-0.00514869	-0.00514869	-0.00514869	-0.0737044	-0.0257434	-0.0205294	-0.00514869
per_RXN969	0.0514869	0.0514869	0.0514869	0.0102974	0.0102974	0.0102974	0.0514869	0.0851879	0.0102974	0.0220942
per_SERINEGLYOXYLATEAMINOTRANSFERASERXN	0.0257434	0.0257434	0.0257434	0.00514869	0.00514869	0.00514869	0.0257434	0.0425939	0.00514869	0.0110471
PGLYCDEHYDROG-RXN	0.00021456	0.00021456	0.00021456	0.00021456	0.00021456	0.00021456	0.00021456	0.00560253	0.00021456	0.00845766
PHE_tx	-9.99146e-06	-9.99146e-06	-9.99146e-06	-9.99146e-06	-9.99146e-06	-9.99146e-06	-9.99146e-06	-9.99146e-06	-9.99146e-06	-9.99146e-06
PHENYLALANINE-AMMONIA-LYASE-RXN	0.000282464	0.000282464	0.000282464	0.000282464	0.000282464	0.000282464	0.000282464	0.000282464	0.000282464	0.000282464
PHOSGLYPHOS-RXN	0	0	0	0.0183994	0.0183994	0.0183994	0	0	5.77779e-34	0.138875
PHOSPHATE_tx	2.44751e-05	2.44751e-05	2.44751e-05	2.44751e-05	2.44751e-05	2.44751e-05	2.44751e-05	2.44751e-05	2.44751e-05	2.44751e-05
PHOSPHOGLUCMUT-RXN	-0.0030748	-0.0030748	-0.0030748	-0.0030748	-0.0030748	-0.0030748	-0.117779	-0.0030748	-0.0621047	-0.0030748
PRAISOM-RXN	1.07723e-06	1.07723e-06	1.07723e-06	1.07723e-06	1.07723e-06	1.07723e-06	1.07723e-06	1.07723e-06	1.07723e-06	1.07723e-06
PREPHENATE-TRANSAMINE-RXN	0.000301038	0.000301038	0.000301038	0.000301038	0.000301038	0.000301038	0.000301038	0.458217	0.000301038	0.237154
PRIBFAICARPISOM-RXN	5.44606e-06	5.44606e-06	5.44606e-06	5.44606e-06	5.44606e-06	5.44606e-06	5.44606e-06	5.44606e-06	5.44606e-06	5.44606e-06
PRO_tx	-4.34284e-06	-4.34284e-06	-4.34284e-06	-4.34284e-06	-4.34284e-06	-4.34284e-06	-4.34284e-06	-4.34284e-06	-4.34284e-06	-4.34284e-06
PROPIONATE-COA-LIGASE	5.61205e-06	5.61205e-06	5.61205e-06	5.61205e-06	5.61205e-06	5.61205e-06	5.61205e-06	5.61205e-06	5.61205e-06	5.61205e-06
PRPPAMIDOTRANS-RXN	-1.44153e-05	-1.44153e-05	-1.44153e-05	-1.44153e-05	-1.44153e-05	-1.44153e-05	-1.44153e-05	-1.44153e-05	-1.44153e-05	-1.44153e-05
PRPPSYN-RXN	3.66105e-05	3.66105e-05	3.66105e-05	3.66105e-05	3.66105e-05	3.66105e-05	3.66105e-05	3.66105e-05	3.66105e-05	3.66105e-05
PRTRANS-RXN	-1.07723e-06	-1.07723e-06	-1.07723e-06	-1.07723e-06	-1.07723e-06	-1.07723e-06	-1.07723e-06	-1.07723e-06	-1.07723e-06	-1.07723e-06
PSERTRANSAM-RXN	-0.00021456	-0.00021456	-0.00021456	-0.00021456	-0.00021456	-0.00021456	-0.00560253	-0.00021456	-0.00845766	-0.00021456
PYRROLINECARBREDUCT-RXN-(NAD)	-4.34284e-06	-4.34284e-06	-4.34284e-06	-4.34284e-06	-4.34284e-06	-4.34284e-06	-4.34284e-06	-4.34284e-06	-4.34284e-06	-4.34284e-06
PYRUVATEORTHOPHOSPHATE-DIKINASE-RXN	-0.00372163	-0.00372163	-0.00372163	-0.00372163	-0.00372163	-0.00372163	-0.170281	0.164607	-0.0894298	0.0837556
RIB5PISOM-RXN	-3.66105e-05	-3.66105e-05	-3.66105e-05	-3.66105e-05	-3.66105e-05	-3.66105e-05	-0.113574	0.0525683	-0.0572783	0.0270547
RXN-1101	0.000110869	0.000110869	0.000110869	0.000110869	0.000110869	0.000110869	0.000110869	0.000110869	0.000110869	0.000110869
RXN-1102	0.000110869	0.000110869	0.000110869	0.000110869	0.000110869	0.000110869	0.000110869	0.000110869	0.000110869	0.000110869
RXN-1103	0.000171595	0.000171595	0.000171595	0.000171595	0.000171595	0.000171595	0.000171595	0.000171595	0.000171595	0.000171595
RXN-1106	0.000171595	0.000171595	0.000171595	0.000171595	0.000171595	0.000171595	0.000171595	0.000171595	0.000171595	0.000171595
RXN-1125	7.91993e-05	7.91993e-05	7.91993e-05	7.91993e-05	7.91993e-05	7.91993e-05	7.91993e-05	7.91993e-05	7.91993e-05	7.91993e-05
RXN-1126	0.000171595	0.000171595	0.000171595	0.000171595	0.000171595	0.000171595	0.000171595	0.000171595	0.000171595	0.000171595
RXN-1143	7.91993e-05	7.91993e-05	7.91993e-05	7.91993e-05	7.91993e-05	7.91993e-05	7.91993e-05	7.91993e-05	7.91993e-05	7.91993e-05
RXN-11654	9.23958e-05	9.23958e-05	9.23958e-05	9.23958e-05	9.23958e-05	9.23958e-05	9.23958e-05	9.23958e-05	9.23958e-05	9.23958e-05
RXN-1827	6.93839e-06	0	6.93839e-06	6.93839e-06	0	6.93839e-06	0	0.0501433	0	0.0263304
RXN-2141	6.93839e-06	0	6.93839e-06	6.93839e-06	0	6.93839e-06	0	0.0501433	0	0.0263304
RXN-6383	5.61205e-06	5.61205e-06	5.61205e-06	5.61205e-06	5.61205e-06	5.61205e-06	5.61205e-06	5.61205e-06	5.61205e-06	5.61205e-06
RXN-6384	5.61205e-06	5.61205e-06	5.61205e-06	5.61205e-06	5.61205e-06	5.61205e-06	5.61205e-06	5.61205e-06	5.61205e-06	5.61205e-06
RXN-7737	5.69468e-06	5.69468e-06	5.69468e-06	5.69468e-06	5.69468e-06	5.69468e-06	5.69468e-06	5.69468e-06	5.69468e-06	5.69468e-06
RXN-7800	2.63391e-05	2.63391e-05	2.63391e-05	2.63391e-05	2.63391e-05	2.63391e-05	2.63391e-05	2.63391e-05	2.63391e-05	2.63391e-05
RXN-7913	-7.94847e-06	-7.94847e-06	-7.94847e-06	-7.94847e-06	-7.94847e-06	-7.94847e-06	-7.94847e-06	-7.94847e-06	-7.94847e-06	-7.94847e-06
RXN-8991	-2.63391e-05	-2.63391e-05	-2.63391e-05	-2.63391e-05	-2.63391e-05	-2.63391e-05	-2.63391e-05	-2.63391e-05	-2.63391e-05	-2.63391e-05
RXN0-384	3.77388e-06	3.77388e-06	3.77388e-06	3.77388e-06	3.77388e-06	3.77388e-06	3.77388e-06	3.77388e-06	3.77388e-06	3.77388e-06
RXN0-5114	0.00021456	0.00021456	0.00021456	0.00021456	0.00021456	0.00021456	0.00021456	0.00560253	0.00021456	0.00845766
RXN0-746	1.53223e-05	1.53223e-05	1.53223e-05	1.53223e-05	1.53223e-05	1.53223e-05	-0.104038	1.53223e-05	-0.0534008	1.53223e-05
S-ADENMETSYN-RXN	0.000252188	0.000252188	0.000252188	0.000252188	0.000252188	0.000252188	0.000252188	0.0918018	0.000252188	0.0473562
SAICARSYN-RXN	1.44153e-05	1.44153e-05	1.44153e-05	1.44153e-05	1.44153e-05	1.44153e-05	1.44153e-05	1.44153e-05	1.44153e-05	1.44153e-05
SER_tx	-4.04071e-05	-4.04071e-05	-4.04071e-05	-4.04071e-05	-4.04071e-05	-4.04071e-05	-4.04071e-05	-4.04071e-05	-4.04071e-05	-4.04071e-05
SERINE-O-ACETTRAN-RXN	9.37763e-06	9.37763e-06	9.37763e-06	9.37763e-06	9.37763e-06	9.37763e-06	9.37763e-06	9.37763e-06	9.37763e-06	9.37763e-06
SHIKIMATE-5-DEHYDROGENASE-RXN	-0.000302115	-0.000302115	-0.000302115	-0.000302115	-0.000302115	-0.000302115	-0.000302115	-0.000302115	-0.000302115	-0.000302115
SHIKIMATE-KINASE-RXN	0.000302115	0.000302115	0.000302115	0.000302115	0.000302115	0.000302115	0.000302115	0.000302115	0.000302115	0.000302115
Sinap_tx	-7.91993e-05	-7.91993e-05	-7.91993e-05	-7.91993e-05	-7.91993e-05	-7.91993e-05	-7.91993e-05	-7.91993e-05	-7.91993e-05	-7.91993e-05
SO4_tx	9.37763e-06	9.37763e-06	9.37763e-06	9.37763e-06	9.37763e-06	9.37763e-06	9.37763e-06	9.37763e-06	9.37763e-06	9.37763e-06
SPONTPRO-RXN	4.34284e-06	4.34284e-06	4.34284e-06	4.34284e-06	4.34284e-06	4.34284e-06	4.34284e-06	4.34284e-06	4.34284e-06	4.34284e-06
STARCH_tx	-0.000111014	-0.000111014	-0.000111014	-0.000111014	-0.000111014	-0.000111014	-0.000111014	-0.000111014	-0.000111014	-0.000111014
SUC_tx	-2.19107e-05	-2.19107e-05	-2.19107e-05	-2.19107e-05	-2.19107e-05	-2.19107e-05	-2.19107e-05	-2.19107e-05	-2.19107e-05	-2.19107e-05
SUCROSE-PHOSPHATASE-RXN	2.19107e-05	2.19107e-05	2.19107e-05	2.19107e-05	2.19107e-05	2.19107e-05	0	0.166562	0	0.0857107
SUCROSE-PHOSPHATE-SYNTHASE-RXN	2.19107e-05	2.19107e-05	2.19107e-05	2.19107e-05	2.19107e-05	2.19107e-05	2.19107e-05	0.166562	2.19107e-05	0.0857107
SULFATE-ADENYLYLTRANSFERASE-ADP-RXN	9.37763e-06	9.37763e-06	9.37763e-06	9.37763e-06	9.37763e-06	9.37763e-06	9.37763e-06	9.37763e-06	9.37763e-06	9.37763e-06
SULFITE-REDUCTASE-(FERREDOXIN)-RXN	9.37763e-06	9.37763e-06	9.37763e-06	9.37763e-06	9.37763e-06	9.37763e-06	9.37763e-06	9.37763e-06	9.37763e-06	9.37763e-06
THR_tx	-2.88491e-05	-2.88491e-05	-2.88491e-05	-2.88491e-05	-2.88491e-05	-2.88491e-05	-2.88491e-05	-2.88491e-05	-2.88491e-05	-2.88491e-05
THR-DEAMINASE-RXN	1.33601e-05	1.33601e-05	1.33601e-05	1.33601e-05	1.33601e-05	1.33601e-05	1.33601e-05	1.33601e-05	1.33601e-05	1.33601e-05
THRESYN-RXN	4.22092e-05	4.22092e-05	4.22092e-05	4.22092e-05	4.22092e-05	4.22092e-05	4.22092e-05	4.22092e-05	4.22092e-05	4.22092e-05
THYMIDYLATESYN-RXN	3.87945e-06	3.87945e-06	3.87945e-06	3.87945e-06	3.87945e-06	3.87945e-06	3.87945e-06	3.87945e-06	3.87945e-06	3.87945e-06
TMP_tx	-3.87945e-06	-3.87945e-06	-3.87945e-06	-3.87945e-06	-3.87945e-06	-3.87945e-06	-3.87945e-06	-3.87945e-06	-3.87945e-06	-3.87945e-06
TRANS-CINNAMATE-4-MONOOXYGENASE-RXN	0.000282464	0.000282464	0.000282464	0.000282464	0.000282464	0.000282464	0.000282464	0.000282464	0.000282464	0.000282464
TRP_tx	-1.07723e-06	-1.07723e-06	-1.07723e-06	-1.07723e-06	-1.07723e-06	-1.07723e-06	-1.07723e-06	-1.07723e-06	-1.07723e-06	-1.07723e-06
TRYPSYN-RXN	1.07723e-06	1.07723e-06	1.07723e-06	1.07723e-06	1.07723e-06	1.07723e-06	1.07723e-06	1.07723e-06	1.07723e-06	1.07723e-06
TYR_tx	-8.5821e-06	-8.5821e-06	-8.5821e-06	-8.5821e-06	-8.5821e-06	-8.5821e-06	-8.5821e-06	-8.5821e-06	-8.5821e-06	-8.5821e-06
UDPKIN-RXN	0.00308662	0.00308662	0.00308662	0.00308662	0.00308662	0.00308662	0.00308662	0.117791	0.00308662	0.0621165
UMP_tx	-3.85585e-06	-3.85585e-06	-3.85585e-06	-3.85585e-06	-3.85585e-06	-3.85585e-06	-3.85585e-06	-3.85585e-06	-3.85585e-06	-3.85585e-06
UMPKI-RXN	1.18161e-05	1.18161e-05	1.18161e-05	1.18161e-05	1.18161e-05	1.18161e-05	1.18161e-05	1.18161e-05	1.18161e-05	1.18161e-05
VAL_tx	-8.8692e-06	-8.8692e-06	-8.8692e-06	-8.8692e-06	-8.8692e-06	-8.8692e-06	-8.8692e-06	-8.8692e-06	-8.8692e-06	-8.8692e-06
